1 **Mitochondria-ER contacts in reactive astrocytes coordinate local perivascular domains to**  
2 **promote vascular remodelling**

3  
4 Jana Gabel<sup>1</sup>, Esther Engelhardt<sup>1</sup>, Patric Pelzer<sup>1</sup>, Vignesh Sakthivelu<sup>1</sup>, Hannah M. Jahn<sup>1</sup>, Milica  
5 Jevtic<sup>1</sup>, Kat Folz-Donahue<sup>2</sup>, Christian Kukat<sup>2</sup>, Astrid Schauss<sup>1</sup>, Christian K. Frese<sup>1</sup>, Patrick  
6 Giavalisco<sup>2</sup>, Alexander Ghanem<sup>3</sup>, Karl-Klaus Conzelmann<sup>3</sup>, Elisa Motori<sup>2,\*,#</sup> and Matteo  
7 Bergami<sup>1,4,5,\*,#</sup>

8  
9 <sup>1</sup>Cologne Excellence Cluster on Cellular Stress Responses in Aging-Associated Diseases

10 (CECAD), University Hospital Cologne, Joseph-Stelzmann-Str. 26, D-50931 Cologne, Germany.

11 <sup>2</sup>Max Planck Institute for Biology of Ageing, Joseph-Stelzmann-Str. 9b, D-50931 Cologne,  
12 Germany.

13 <sup>3</sup>Max von Pettenkofer-Institute Virology, Faculty of Medicine and Gene Center, Ludwig Maximilians  
14 University Munich, Feodor-Lynen-Str. 25, D-81377 Munich, Germany.

15 <sup>4</sup>Institute of Genetics, Zùlpicher Str. 47a, D-50674, University of Cologne, Germany

16 <sup>5</sup>Center for Molecular Medicine, Robert-Koch-Str. 21, 50931 Cologne, Germany

17 \*Equal contribution

18 #Correspondence to: Elisa Motori

19 Max Planck Institute for Biology of Ageing, Germany

20 Email: [elisa.motori@age.mpg.de](mailto:elisa.motori@age.mpg.de)

21 Phone: +49 (0)221 37970 766

22  
23 Matteo Bergami

24 CECAD-University Hospital of Cologne, Germany

25 Email: [matteo.bergami@uk-koeln.de](mailto:matteo.bergami@uk-koeln.de)

26 Phone: +49 (0)221 478 84250

27

## 28 **Summary**

29 Astrocytes have emerged for playing important roles in brain tissue repair, however the underlying  
30 mechanisms remain poorly understood. We show that acute injury and blood-brain barrier  
31 disruption trigger the formation of a prominent mitochondrial-enriched compartment in astrocytic  
32 end-feet which enables vascular remodeling. Integrated imaging approaches revealed that this  
33 mitochondrial clustering is part of an adaptive response regulated by fusion dynamics. Astrocyte-  
34 specific conditional deletion of Mitofusin 2 (*Mfn2*) suppressed perivascular mitochondrial clustering  
35 and disrupted mitochondria-ER contact sites. Functionally, two-photon imaging experiments  
36 showed that these structural changes were mirrored by impaired mitochondrial  $\text{Ca}^{2+}$  uptake leading  
37 to abnormal cytosolic transients within end-feet *in vivo*. At the tissue level, a compromised vascular  
38 complexity in the lesioned area was restored by boosting mitochondrial-ER perivascular tethering  
39 in MFN2-deficient astrocytes. These data unmask a crucial role for mitochondrial dynamics in  
40 coordinating astrocytic local domains and have important implications for repairing the injured  
41 brain.

42

43

44

45

46

47

48

49

50

51

52

53

## 54 **Introduction**

55           Astrocytes regulate essential aspects of brain energy metabolism (Belanger et al., 2011)  
56 but also play important roles in the progression and possible resolution of numerous brain  
57 pathologies, including traumatic brain injury and stroke (Sofroniew, 2015). These types of injury  
58 often result in significant damage to the cerebrovasculature and are usually accompanied by  
59 blood-brain barrier breakdown, intracerebral hemorrhage, hypoxia, secondary inflammation and  
60 neurodegeneration (Prakash and Carmichael, 2015; Salehi et al., 2017). While a number of factors  
61 concerning the severity of the primary insult contribute to the extent of tissue damage and thus  
62 influence the subsequent attempt to repair, our understanding of the mechanisms underlying  
63 neovascularization in the injured area and which exact cellular components are recruited is still  
64 rudimentary.

65           Besides endothelial cells and pericytes, which constitute the actual blood-brain-barrier,  
66 astrocytic end-feet functionally ensheath most of the cerebrovascular network and serve as  
67 specialized dynamic exchange sites for ions, water and energy substrates with brain parenchyma  
68 (Iadecola, 2017). While maintenance of this tight coupling ensures the supply of metabolites across  
69 the gliovascular interface, thereby contributing to neurovascular coupling (Iadecola, 2017), the  
70 structural and functional changes experienced by astrocytic perivascular end-feet following injury  
71 and the ensuing vascular damage are much less understood. In these settings, astrocytes are  
72 known to acquire a reactivity cellular state which may underlie both beneficial and deleterious  
73 functions (Khakh and Sofroniew, 2015; Liddel and Barres, 2017). Interestingly, some of these  
74 functions have been described for regulating angiogenesis via the secretion of trophic factors and  
75 molecules which can ultimately lead to vascular remodeling (Salehi et al., 2017). Furthermore,  
76 evidence for a prominent physical association between perivascular astrocytes and vessels in the  
77 peri-lesioned area has been reported following acute injury, particularly at a time matching with the  
78 formation of new vessels (Hornig et al., 2017; Villapol et al., 2014), thus suggesting that structural  
79 changes at the gliovascular interface may be critical in regulating vascular remodeling after injury.  
80 Importantly, while emerging evidence indicates that the contribution of astrocytes to disease  
81 progression depends on the specific type of reactivity state acquired (Anderson et al., 2016;

82 Liddel et al., 2017), it is becoming clear that these states underlie not only major changes in  
83 morphology and gene expression but also a significant extent of metabolic plasticity (Chao et al.,  
84 2019; Polyzos et al., 2019). Supporting this notion, astrocytes can utilize oxidative phosphorylation  
85 (OXPHOS) for their energy metabolism (Ignatenko et al., 2018; Lovatt et al., 2007), yet they  
86 efficiently sustain for long periods of time glycolytic fluxes (Supplie et al., 2017), underscoring the  
87 capability of these cells to accommodate a significant metabolic rewiring depending on substrate  
88 availability and local energy needs (Hertz et al., 2007). This important form of plasticity is  
89 emphasized by the fact that astrocytes reacting to injury *in vivo* can adjust their metabolic signature  
90 by efficiently and reversibly modifying the architecture of their mitochondrial network (Motori et al.,  
91 2013; Owens et al., 2015), i.e. the central hub for cellular energy metabolism and metabolic  
92 signaling, thus suggesting that these mitochondrial responses may also represent an important  
93 mechanism whereby astrocytes actively contribute to tissue remodeling.

94 The architecture of the mitochondrial network in cells is usually very dynamic and its  
95 maintenance depends upon regulated fusion-fission events as well as on abundant contact sites  
96 with the ER and other organelles (Labbe et al., 2014). In mammalian cells, the main drivers of  
97 mitochondrial membrane dynamics are mitofusins (MFN1 and MFN2) (Chen et al., 2003) and optic  
98 atrophy-1 (OPA1) (Cipolat et al., 2004) for mitochondrial fusion, while dynamin-related protein-1  
99 (DRP1) is the key player in outer mitochondrial fission (Ishihara et al., 2009). Together, the  
100 coordinated action of these molecules shapes mitochondria towards more fragmented or elongated  
101 morphologies to match precise cellular metabolic needs (Dietrich et al., 2013; Gomes et al., 2011;  
102 Rambold et al., 2011). Functionally, this mitochondrial remodeling is also regulated by a physical  
103 tethering with ER membranes to form specialized contact sites (so-called mitochondria-associated  
104 membranes or MAMs) that control important metabolic signaling functions (Scorrano et al., 2019),  
105 including lipid trafficking as well as the formation of  $\text{Ca}^{2+}$  and ROS microdomains (Csordas et al.,  
106 2018). Intriguingly, evidence exists for complex mitochondrial and ER morphologies in astrocytes  
107 *in situ*, where these organelles have been found to reach fine perisynaptic processes and end-feet  
108 (Gobel et al., 2018; Jackson and Robinson, 2018; Lovatt et al., 2007; Mathiisen et al., 2010; Motori  
109 et al., 2013). While this spatial distribution suggests the direct contribution of MAMs to specific

110 astrocytic functions, whether and to which extent a dynamic remodeling of these two organelles  
111 may effectively couple the acquisition of a reactive state with functional metabolic changes is  
112 unclear.

113 Here, we provide evidence that acute brain injury triggers a distinctive clustering of  
114 mitochondria in perivascular astrocytic end-feet, where they form extensive contact sites with the  
115 ER. Our data indicate that this clustering is coordinated by mitochondrial fusion dynamics and  
116 generates a local mitochondrial-enriched domain surrounding microvessels. *Mfn2* deficiency in  
117 reactive astrocytes prevented injury-induced perivascular accumulation of mitochondria, altered the  
118 extent of mitochondria-ER tethering leading to disrupted  $\text{Ca}^{2+}$  dynamics in astrocyte end-feet, and  
119 ultimately impaired angiogenesis and vascular remodeling in the injured area. Importantly, our data  
120 indicate that vascular remodeling can be restored in absence of mitochondrial fusion by forcefully  
121 enhancing perivascular mitochondria-ER contact sites. These results establish a mechanism for  
122 mitochondrial fusion in orchestrating local functional domains in astrocytes *in vivo* and unravel a  
123 key role for astrocytic mitochondria-ER contact sites in sustaining microvasculature remodeling  
124 during repair.

125

## 126 **Results**

### 127 **Astrocyte end-feet are naturally enriched in mitochondria-ER contact sites**

128 In order to investigate how the architecture of mitochondrial and ER networks may match  
129 the morphological complexity of astrocytes we utilized a virus-based strategy to label specifically  
130 these organelles *in vivo* (Figure 1A). Minimal amounts of either hGFAP promotor-driven adeno-  
131 associated viruses (AAV) or modified EnvA-pseudotyped rabies viruses (RABV) were  
132 stereotactically injected into the cortex of wild-type or hGFAP-TVA mice, respectively, to drive the  
133 expression of mitochondrial- or ER-targeted fluorophores (i.e. mitoRFP and ER-GFP). Both viral-  
134 based approaches have been previously shown to efficiently restrict the expression of transgenes  
135 to astrocytes in the adult brain (Motori et al., 2013; Shigetomi et al., 2013). Single-astrocyte  
136 analysis one week after virus delivery revealed a complex morphology of these organelles, which  
137 were found decorating the most peripheral astrocytic processes, including fine branchlets (Figure

138 1B). Interestingly, besides few primary branches originating from the soma, structures identified as  
139 perivascular end-feet (i.e., possessing a tube-like morphology and surrounding CD31+ vessels)  
140 were often enriched in ER and mitochondria (Figure 1C and S1A-B). In these regions, the ER  
141 appeared to virtually delineate the shape of vessels, while mitochondria often formed a dense  
142 meshwork that was much similar to the one observed within primary branches rather than distally-  
143 located fine perisynaptic processes (branchlets) (Figure 1C and S1A-B). Experiments conducted  
144 by labelling the microvasculature via systemic dextran injection prior to sacrifice revealed that  
145 astrocytic ER and mitochondrial networks outlined the labelled vessels to the extent that often  
146 whole sections of the microvasculature appeared wrapped by a thin but discernible layer of  
147 astrocytic organelles (Figure 1D-E). In contrast, virus-mediated labelling of other organelles  
148 including peroxisomes and lysosomes yielded a much different distribution, being largely confined  
149 to the cell body and major branches (Figure S1C-F).

150 At the ultrastructural level, astrocytic end-feet appeared enriched with ER membranes  
151 surrounding not only the basal lamina but also most of mitochondria located within the perivascular  
152 process (Figure 1F and Figure S1G-H). In particular, substantial portions of the mitochondrial  
153 perimeter were bordered by ER membranes and, at these contact sites, the two organelles  
154 maintained an average reciprocal distance of  $18.9 \pm 5.0$  nm (Figure 1F). By comparison, both the  
155 size of mitochondria and the extent of ER membranes were smaller in perisynaptic astrocytic  
156 processes, resulting in visibly fewer contact sites, despite a similar mitochondria-ER average  
157 distance of  $20.4 \pm 7.0$  nm (Figure 1G). Accordingly, morphological quantification revealed a net  
158 enrichment in mitochondrial area and mitochondria-ER tethering domains within the end-feet  
159 (Figure 1H), suggestive of key metabolic functions being regulated by these two organelles at  
160 perivascular sites.

161

## 162 **Marked remodelling of astrocyte mitochondrial networks following cortical injury**

163 Astrocyte reactivity states are characterized by prominent changes in energy metabolism  
164 and mitochondrial network morphology (Castejon, 2015; Hamby et al., 2012; Motori et al., 2013;  
165 Zamanian et al., 2012), raising the question of whether perivascular organelle distribution may

166 become affected during the acquisition of a reactive cellular state. To answer this question, we  
167 utilized a genetic approach to conditionally express mitoYFP in adult astrocytes and investigate in  
168 detail mitochondrial morphology after cortical stab-wound (SW)-injury *in vivo* (Figure 2A). Human-  
169 GFAP-CreER mice (Chow et al., 2008) were crossed with mitoYFP floxed-stop mice (Sterky et al.,  
170 2011) and the resulting line was induced with tamoxifen at the age of 6-8 weeks. With this  
171 approach, about 88% of cortical astrocytes (S100 $\beta$ +) underwent recombination (Figure S2A),  
172 allowing for a systematic analysis of the changes in the mitochondrial network of cells located in  
173 the vicinity of the lesion track (i.e. the area mostly enriched in extravasating pro-inflammatory  
174 CD45+ leukocytes) (Figure 2B and S2B). In particular, by one week following SW, astrocytes  
175 reacted by overt mitochondrial fragmentation throughout all their cellular territories (Figure 2C and  
176 S2B) despite no major changes in the overall expression levels of mitochondrial fission-fusion  
177 proteins detected at this time (Figure S2F-G), suggesting the occurrence of post-translational  
178 modifications of the existing fission-fusion protein machinery (Anton et al., 2013; Motori et al.,  
179 2013). Yet, detailed morphometric analysis of reconstructed whole mitoYFP+ astrocytes revealed  
180 that, irrespective of their “metabolic” state (i.e., whether resting or reactive), the mitochondrial  
181 network in these cells was usually composed by highly heterogeneous morphologies, with both  
182 tubular and very long (up 8-10  $\mu$ m) as well as much shorter organelles (less than 0.5  $\mu$ m) (Figure  
183 2C). This morphological diversity became apparent when plotting the length versus sphericity of  
184 the whole mitochondrial population of several reconstructed astrocytes selected for their close  
185 proximity to the lesion track (Figure 2D): by 7 days post-SW the mitochondrial network displayed a  
186 significant shift towards fragmentation with over 60% of the whole mitochondrial population being  
187 <1  $\mu$ m in length, in contrast to a 43.5% in control astrocytes (Figure 2D). Whole-cell, time-course  
188 analysis during a period ranging from 3 days to 2 months after SW-injury revealed that while the  
189 fraction of fragmented mitochondria sharply increased during the first week, the network was  
190 restored to levels comparable to control astrocytes by the third week (Figure 2E). This trend was  
191 mirrored by opposite changes in the proportion of tubular mitochondria, confirming that the  
192 evolving reactive state of astrocytes proximal to the lesion is accompanied by a time-dependent

193 remodelling of the whole mitochondrial network over the course of several weeks after injury  
194 (Motori et al., 2013).

195 Interestingly, inspection of microvessels proximal to the lesion (labelled via either dextran  
196 injection or CD31 immunostaining) revealed a conspicuous accumulation of astrocytic  
197 mitochondria in perivascular end-feet (Figure 2F and S2C). In particular, analysis of vessel cross-  
198 sections disclosed that the extent of mitochondria surrounding the vessels markedly increased by 7  
199 and 28 days after SW (Figure 2G-H), the latter being a time when mitochondrial network  
200 morphology astrocyte-wide had already normalized back to control levels (Figure 2E). In contrast,  
201 mitochondrial density in peripheral branches and total mitochondrial mass in astrocytes (the latter  
202 examined both via microscopic mitoYFP quantification and label-free proteomic analysis of  
203 markers associated with mitochondrial biogenesis and mass in sorted astrocytes) appeared only  
204 mildly affected (Figure S2D-E and S2H). We next assessed whether the ER may also undergo a  
205 similar extent of remodelling in response to injury. Reactive astrocytes expressing ER-GFP  
206 appeared to retain a significant amount of ER at perivascular end-feet surrounding CD31+ vessels  
207 (Figure S2C). Three-dimensional reconstruction of individual ER-GFP-expressing astrocytes in  
208 conjunction with dextran-labelling revealed the whole distribution of the ER network across distinct  
209 astrocytic territories in uninjured hemispheres (Figure 2J and Figure S2I). In these control samples,  
210 the GFP signal allowed for the assessment of a perivascular ER-GFP “g-ratio” to investigate  
211 changes in perivascular ER dynamics and normalize these to putative variations in microvessel  
212 diameter (Figure 2K and S2J). This analysis disclosed a time-dependent increase in the thickness  
213 of perivascular ER-GFP signal, which peaked by 7 days post-SW but reverted to near-basal  
214 conditions by 28 days (Figure 2K). These results were corroborated relative volume distribution  
215 analysis of the ER-GFP signal (i.e. signal density) across astrocytic compartments (Figure S2I). In  
216 control astrocytes, perivascular end-feet accounted for 19.2% of all ER-GFP signal in individual  
217 cells (Figure S2L). In contrast, in injury-induced reactive astrocytes an accumulation of ER-GFP  
218 signal was observed in the end-feet (35.9%) at the expenses of main branches (where the relative  
219 ER-GFP proportion decreased from 39.1% in controls to 25.2% in injured samples) (Figure S2K  
220 and S2L-M). Interestingly, by 28 days after SW the relative distribution of ER-GFP signal mostly



221 normalized (Figure S2K and S2L-M), suggesting that in contrast to the enduring response of the  
222 mitochondrial network in perivascular end-feet (Figure 2H), remodelling of the ER compartment  
223 may only be temporary. Together, these data reveal that mitochondrial and ER networks undergo a  
224 regionalized morphological rearrangement in perivascular end-feet of astrocytes reacting to acute  
225 injury.

226

### 227 **Conditional deletion of *Mfn2* disrupts perivascular mitochondria-ER contact sites in** 228 **astrocytes**

229 The reversible transition of the mitochondrial network from fragmentation at 7 days post-SW  
230 to a tubular network by 21 days (Figure 2E), together with the peculiar remodelling of mitochondria  
231 within the end-feet of reactive astrocytes (Figure 2G-H), argues in favour of regulatory mechanisms  
232 playing a role in adjusting the mitochondrial network to match evolving metabolic needs in  
233 response to injury. We reasoned that interfering with these mechanisms by preventing  
234 mitochondrial re-tubulation may provide a valid approach to dissect the specific role of this network  
235 remodelling for astrocyte physiology (Figure 3A). We opted for the conditional deletion of the  
236 GTPase protein MFN2, which is a key effector of mitochondrial outer membrane fusion dynamics  
237 but also plays a role in maintaining mitochondria-ER tethering domains (de Brito and Scorrano,  
238 2008). Specific deletion in astrocytes was achieved by crossing *Mfn2* floxed mice (Lee et al., 2012)  
239 with the inducible hGFAP-CreER x mitoYFP floxed-stop mouse line (hereafter defined as *Mfn2*<sup>ckO</sup>  
240 mice). Few weeks after tamoxifen-mediated recombination induced in 2-month old mice, *Mfn2*  
241 gene knock-out was assessed by genotyping of isolated brain cortices (Figure S3A-B) and protein  
242 depletion was validated via mass spectrometry analysis of astrocytes acutely sorted from brain  
243 cortex via magnetic cell separation (MACS) (Figure 3B). In contrast to classic astrocytic markers  
244 (i.e., GLAST, GLT-1, ALDH1L1 and AQP4) or other reference mitochondrial proteins (OPA1 and  
245 TOMM40), MFN2 was specifically and markedly downregulated (more than 9 folds, Figure 3B).  
246 Analysis of transmission electron microscopic (TEM) pictures revealed fewer and circular  
247 mitochondria of significant size within the end-feet of *Mfn2*<sup>ckO</sup> astrocytes, in net contrast to *Mfn2*<sup>WT</sup>  
248 samples, in which elongated and branched morphologies were observed lining the basal lamina of

249 microvasculature cross-sections (i.e., having an average vessel diameter of  $3.5 \pm 0.6 \mu\text{m}$  in  $Mfn2^{\text{WT}}$   
250 and  $3.6 \pm 0.6 \mu\text{m}$  in  $Mfn2^{\text{ckO}}$ ) (Figure 3C and 3E). Close inspection of perivascular end-feet  
251 revealed however that the overall distribution of the ER was not overtly affected in  $Mfn2^{\text{ckO}}$   
252 astrocytes, with long stretches of ER tubule surrounding the basal lamina as in  $Mfn2^{\text{WT}}$  astrocytes  
253 (Figure 3D). Interestingly,  $Mfn2^{\text{ckO}}$  mitochondria were less enriched in ER contact sites despite the  
254 nearby presence of abundant ER membranes (Figure 3C-E). Notably, deletion of *Mfn2* in  
255 astrocytes did not visibly affect mitochondrial cristae morphology within the examined time frame (4  
256 weeks post-tamoxifen treatment) (Figure 3C). Together, these results indicate that conditional  
257 deletion of *Mfn2* in adult astrocytes *in vivo* leads to ultrastructural morphological changes of their  
258 mitochondria and a concomitant reduction in the extent of mitochondria-ER contact sites within  
259 end-feet.

260

### 261 **Astrocyte-specific *Mfn2* deletion abrogates perivascular remodelling of still functional** 262 **mitochondria**

263 We next asked the question whether *Mfn2* deletion would be sufficient to prevent astrocyte  
264 mitochondrial network remodelling in response to acute injury. Histological and protein examination  
265 of astrocytes (i.e., via label-free proteomic analysis of sorted reactive astrocytes at 4 weeks post-  
266 SW) derived from lesioned  $Mfn2^{\text{ckO}}$  animals revealed no overt abnormalities in the extent of GFAP  
267 or Vimentin expression (i.e., classic markers of reactivity) within the area surrounding the lesion  
268 track at 7 days post-SW (Figure 4A and S3C-D). Analysis of recently annotated additional markers  
269 of astrocytic reactivity (Liddelow et al., 2017) detected in our proteomic dataset revealed variable  
270 changes in their expression levels, with no obvious trend towards a higher or lower reactivity state  
271 (Figure S3D). At the single-cell level, however, mitochondrial network morphology in  $Mfn2^{\text{ckO}}$   
272 astrocytes appeared significantly affected even in uninjured conditions when compared to control  
273 astrocytes (Figure S4A). In particular, mitochondria appeared fragmented throughout astrocytic  
274 territories, confirming loss of MFN2 and the consequent lack of mitochondrial fusion dynamics  
275 starting as soon as one week after tamoxifen-induced recombination. In contrast, the ER network  
276 retained an overall intact morphology in the absence of MFN2 (Figure S4B). Interestingly,

277 conditional deletion of *Mfn1* resulted in somewhat heterogeneous and less pronounced  
278 morphological changes (Figure S4A), suggesting either differences in the relative expression levels  
279 of the two mitofusins or potential compensatory effects in the expression levels of MFN2 following  
280 *Mfn1* deletion (Figure S3E), as previously reported for other tissues (Kulkarni et al., 2016). Single-  
281 cell, time-course analysis of mitochondrial morphology revealed that both *Mfn2*<sup>ckO</sup> and *Mfn1*<sup>ckO</sup>  
282 astrocytes retained the capability to undergo further fragmentation following SW (Figure 4B). In  
283 particular, by 7 days post-SW, i.e. at the peak of fragmentation in control astrocytes, the overall  
284 proportion of fragmented versus tubular mitochondria appeared almost indistinguishable between  
285 examined groups (Figure 4B). However, while control and *Mfn1*<sup>ckO</sup> astrocytes gradually and  
286 efficiently reformed a tubular network by 28 days post-SW, *Mfn2*<sup>ckO</sup> astrocytes lacked this ability  
287 and were left with visibly fragmented mitochondria (Figure 4B-C). Importantly, perivascular  
288 mitochondrial clustering induced by injury was significantly impaired in *Mfn2*<sup>ckO</sup> astrocytes proximal  
289 to the lesion site, in contrast to wild-type (control) and *Mfn1*<sup>ckO</sup> astrocytes, in which the extent of  
290 mitoYFP signal essentially doubled (Figure 4D-E and S4C). Conspicuously, TEM analysis of  
291 *Mfn2*<sup>ckO</sup> astrocytes confirmed a marked reduction in mitochondrial density and mitochondria-ER  
292 contact sites in perivascular end-feet despite intact mitochondrial cristae and presence of abundant  
293 ER tubules (Figure S4D-F).

294 The presence of intact cristae structure in reactive *Mfn2*<sup>ckO</sup> astrocytes raised the question of  
295 whether these mitochondria were still metabolically competent. We thus further examined our  
296 proteomic dataset of acutely sorted *Mfn2*<sup>ckO</sup> astrocytes at 4 weeks post-SW (Figure 4F and S3C).  
297 Ingenuity Pathway Analysis (IPA) of our dataset disclosed the Oxidative Phosphorylation pathway  
298 among the *Mfn2*<sup>ckO</sup>-specific, down-regulated hits in our samples (Figure S3F), yet detailed  
299 inspection of mitochondrial respiratory chain complexes indicated that only a few of the detected  
300 subunits in complexes I, III, IV and V were significantly down-regulated (Figure S3G). Likewise,  
301 proteins associated with mitochondrial stress responses revealed that only few of them were  
302 significantly up-regulated in *Mfn2*<sup>ckO</sup> astrocytes (Figure S3H), suggesting that absence of MFN2  
303 brings about only a modest mitochondrial dysfunction on top of potential changes induced by injury  
304 itself. Interestingly, we observed a general up-regulation in the protein expression levels of

305 enzymes associated to the tricarboxylic acid (TCA) cycle (Figure 4G) and the catabolism of amino  
306 acids and their derivatives (Figure S3F), which have emerged as hallmarks of mitochondrial  
307 metabolic rewiring in multiple cell types (Chen et al., 2018). Of note, a similar upregulation was  
308 found in *Mfn1*<sup>ckO</sup> astrocytes (Figure 4G and S3F). However, targeted metabolomics of sorted  
309 astrocytes following systemic infusion of <sup>13</sup>C<sub>6</sub>-Glucose (Figure 4F) revealed no changes in the  
310 incorporation of glucose-derived carbon into TCA cycle intermediates or amino acids between  
311 control, *Mfn2*<sup>ckO</sup> and *Mfn1*<sup>ckO</sup> astrocytes (Figure 4H-J), indicating that mitochondrial bioenergetics  
312 are not overtly compromised in reactive *Mfn2*<sup>ckO</sup> astrocytes up to 4 weeks post-SW.

313 Altogether, these results indicate that while conditional *Mfn2* deletion in reactive astrocytes  
314 prevents perivascular enrichment of mitochondria and mitochondria-ER contact sites,  
315 mitochondrial cristae structure and function remain to large degree unaffected after injury.

316

### 317 **Lack of MFN2 dampens astrocytic mitochondrial Ca<sup>2+</sup> uptake and leads to abnormal** 318 **perivascular Ca<sup>2+</sup> transients after SW-injury *in vivo***

319 The absence of a clear perivascular mitochondrial clustering together with the marked  
320 reduction in mitochondria-ER contact sites in reactive *Mfn2*<sup>ckO</sup> astrocytes provides an opportunity  
321 for investigating potential functional consequences confined to this cellular compartment.  
322 Interestingly, protein expression levels belonging to a Calcium Transport pathway in our IPA  
323 analysis were selectively upregulated in *Mfn2*<sup>ckO</sup> astrocytes (Figure S3F). In particular, analysis of  
324 proteins known to regulate Ca<sup>2+</sup> influx/efflux through the mitochondrial, ER and plasma membranes  
325 revealed differential yet pronounced changes, with a clear trend towards elevated expression of  
326 Ca<sup>2+</sup> channels and transporters in mitochondrial as well as plasma membranes specifically in  
327 *Mfn2*<sup>ckO</sup> astrocytes (Figure 4K). We thus focused our analysis on local astrocytic Ca<sup>2+</sup> dynamics  
328 (Volterra et al., 2014), as mitochondria-ER tethering domains are known to play a major role in  
329 mediating mitochondrial Ca<sup>2+</sup> uptake and by consequence in regulating cytosolic Ca<sup>2+</sup> handling  
330 mechanisms (Csordas et al., 2018; Rizzuto et al., 2012).

331 We first evaluated the extent of mitochondrial Ca<sup>2+</sup> uptake by stereotactically delivering an  
332 astrocyte-specific AAV expressing the calcium indicator GCaMP6f targeted to the mitochondrial

333 matrix (mitoGCaMP6) into the cerebral cortex of Mfn2<sup>ckO</sup> or control littermates, and concurrently  
334 inflicted a unilateral SW lesion in the injected area (Figure 5A). We then conducted 2-photon laser  
335 scanning microscopy (2PLSM) at 7 or 28 days after SW in freshly prepared brain slices. Imaging  
336 was carried out in sessions of 3 minutes each, which corresponded to a time window during which  
337 mitochondrial movement or fusion-fission dynamics - as examined via photoactivatable mito-GFP  
338 experiments in comparable settings - were negligible (Figure S5A-C), thus allowing a reliable  
339 quantification of local relative changes in mitoGCaMP6 signal. We also developed a dedicated  
340 algorithm (which we termed AstroSparks, see methods) permitting a semi-automated identification  
341 and quantification of spontaneous mitochondrial Ca<sup>2+</sup> transients, including their activity, frequency,  
342 amplitude and duration (Figure 5B). This allowed us to reveal that, in resting astrocytes,  
343 perivascular mitochondria are intrinsically more active but display a lower amplitude in their Ca<sup>2+</sup>  
344 transients than mitochondria localized in branches and branchlets (Figure 5C-D). Analysis of  
345 Mfn2<sup>ckO</sup> astrocytes under uninjured conditions (Figure 5E) disclosed an intrinsically lower  
346 mitochondrial Ca<sup>2+</sup> activity within their end-feet (46.6% active ROIs of all ROIs per cell) as  
347 compared to Mfn2<sup>WT</sup> astrocytes (68.2 % active ROIs of all ROIs per cell) (Figure 5F). Interestingly,  
348 following SW-injury Mfn2<sup>WT</sup> astrocytes displayed a peculiar pattern in their mitochondrial Ca<sup>2+</sup>  
349 uptake dynamics that mirrored the morphological changes in mitochondrial network architecture  
350 described in Figure 2E: by 7 days (i.e. the peak of mitochondrial fragmentation) the extent of active  
351 mitochondria was visibly reduced (55.3 % of all ROIs per cell), whereas by 28 days (the time when  
352 mitochondrial tubular morphology had been re-established) this percentage had reverted to levels  
353 comparable to uninjured conditions (62.8 %) (Figure 5F). Likewise, most of the other parameters  
354 pertaining to Ca<sup>2+</sup> uptake dynamics, particularly the frequency and duration of Ca<sup>2+</sup> events per  
355 mitochondrion, also followed a reversible pattern over time in Mfn2<sup>WT</sup> astrocytes (Figure 5G). In  
356 contrast, analysis of Mfn2<sup>ckO</sup> astrocytes revealed that mitochondria in these cells are virtually  
357 unresponsive to injury-induced changes of mitochondrial Ca<sup>2+</sup> uptake all through the analysed  
358 times (Figure 5F-G). In particular, the values of frequency, amplitude and duration of Ca<sup>2+</sup>  
359 transients were not only already affected in absence of any SW-injury, but also compared rather  
360 well with the 7-day time-point of the Mfn2<sup>WT</sup> group (Figure 5G), suggesting that primary alterations

361 in mitochondrial network morphology (i.e., towards fragmentation) and mitochondria-ER tethering  
362 *per se* are, at least in part, responsible for the changes in mitochondrial  $\text{Ca}^{2+}$  uptake observed  
363 here.

364 Analysis of slices containing cytoGCaMP6-expressing astrocytes revealed plain differences  
365 with regard to  $\text{Ca}^{2+}$  transients taking place in the cytosol as compared to mitochondria (Figure 5H  
366 and S5D-E). In particular, cytosolic transients in uninjured  $\text{Mfn2}^{\text{WT}}$  astrocytes were markedly  
367 shorter in duration and, on average, higher in frequency than mitochondrial ones (Figure 5H and  
368 S5E-F), consistent with a role played by mitochondria in rapidly buffering  $\text{Ca}^{2+}$  ions following  
369 cytosolic influx (Rizzuto et al., 2012). SW-injury in cytoGCaMP6-expressing  $\text{Mfn2}^{\text{WT}}$  astrocytes  
370 significantly modified perivascular cytosolic transients at 7 days (Figure S5F), yet these changes  
371 were not fully reversed by 28 days post-SW, suggesting the emergence of long-lasting alterations  
372 in the expression of membrane  $\text{Ca}^{2+}$  transporters and/or handling mechanisms that may persist up  
373 to 1 month after injury. Notably, the frequency of cytosolic transients was significantly altered in  
374 resting astrocytes upon conditional deletion of *Mfn2*, but not *Mfn1* (Figure S5E-F), and culminated  
375 in an exaggerated  $\text{Ca}^{2+}$  activity (i.e., frequency and amplitude of events) by 28 days post-SW  
376 (Figure S5F), thus validating our  $\text{Mfn2}^{\text{cKO}}$  proteomic dataset (Figure 4C). Interestingly, similar  
377 changes in  $\text{Ca}^{2+}$  activity were also observed in astrocyte branches (Figure S5G), suggesting that  
378 lack of MFN2 affected mitochondrial and cytosolic  $\text{Ca}^{2+}$  frequency dynamics to an overall  
379 comparable extent in all astrocytic territories.

380 While slice imaging allowed us to identify the overall changes in astrocytic mitochondrial  
381 and cytosolic  $\text{Ca}^{2+}$  activity following SW-injury, it precluded the possibility to examine in detail the  
382 regionalized  $\text{Ca}^{2+}$  dynamics within an intact neurovascular unit. To circumvent this caveat, we  
383 performed 2PLSM of  $\text{Mfn2}^{\text{cKO}}$  astrocytes in anesthetized animals *in vivo* following cranial window  
384 implantation and concurrent vasculature labelling with dextran-red (Figure 5I). For these  
385 experiments we introduced the inducible reporter line GCaMP3 floxed-stop (Zariwala et al., 2012)  
386 in our  $\text{Mfn2}^{\text{cKO}}$  mice, thus allowing for a systematic analysis of subcellular changes in cytosolic  
387  $\text{Ca}^{2+}$  activity without the need to inject any AAV. In particular, dextran labelling allowed us to  
388 unambiguously identify perivascular end-feet in GCaMP3-expressing astrocytes *in vivo*, and by

389 exclusion the main branches and branchlets (Figure 5J). Analysis of  $\text{Ca}^{2+}$  frequency in this setting  
390 confirmed that  $\text{Mfn2}^{\text{WT}}$  astrocytes undergo substantial alterations in response to SW-injury peaking  
391 at 7 days and persisting up to 28 days (Figure 5L and S5G). Importantly, by this time *Mfn2* deletion  
392 led to an abnormal frequency of  $\text{Ca}^{2+}$  events which resulted in significantly higher rates of  
393 perivascular transients ( $0.64 \pm 0.03$  events/min/domain in  $\text{Mfn2}^{\text{cKO}}$  astrocytes vs  $0.46 \pm 0.01$   
394 events/min/domain in controls) (Figure 5K-L). While this phenotype was present both in end-feet  
395 and branches (Figure S5G), analysis of the spatial spreading of  $\text{Ca}^{2+}$  transients within astrocytic  
396 territories revealed that prominent and enduring changes (i.e. broader transients) up to 28 days  
397 post-SW were a unique feature of perivascular compartments in astrocytes lacking MFN2 (average  
398 transient size of  $4.98 \pm 0.67 \mu\text{m}^2$  in  $\text{Mfn2}^{\text{cKO}}$  vs  $3.25 \pm 0.33 \mu\text{m}^2$  in  $\text{Mfn2}^{\text{WT}}$ ) (Figure 5M). This hallmark  
399 was masked at 7 days post-SW, when control astrocytes also showed broader transients  
400 presumably due to their conspicuous mitochondrial fragmentation and reduced mitochondrial  $\text{Ca}^{2+}$   
401 uptake (Figure 5G), yet this specificity for the end-feet indicates that injury-induced accumulation of  
402 mitochondria-ER contact sites at this location helps to demarcate a region of distinctive  $\text{Ca}^{2+}$   
403 signalling and, supposedly, metabolic supply which may potentially contribute to vascular  
404 remodelling following injury.

405

#### 406 **Astrocyte mitochondrial fusion dynamics are required for vascular remodeling following** 407 **injury**

408 In order to understand if the observed structural and functional changes in perivascular  
409 mitochondrial-ER contact sites exhibited by  $\text{Mfn2}^{\text{cKO}}$  astrocytes may have any direct consequence  
410 for vascular remodelling, we performed a systematic analysis of the vascular plexus following  
411 cortical injury. SW-injured mice were intravenously infused with dextran-red shortly before sacrifice  
412 and their cortices processed for clearing and 2PLSM to obtain a complete overview of the vascular  
413 network architecture (Figure 6A). Top views of the first  $600 \mu\text{m}$  deep into the cortex revealed that  
414 uninjured hemispheres were virtually undistinguishable among  $\text{Mfn2}^{\text{cKO}}$  and  $\text{Mfn2}^{\text{WT}}$  mice, showing  
415 comparable density and integrity of the labelled vasculature (Figure 6B). By 7 days post-SW,  
416 however, a clear lesion track and a reduction in vascular density became visible in  $\text{Mfn2}^{\text{WT}}$  mice,

417 yet Mfn2<sup>ckO</sup> cortices showed a much prominent rarefication of the vasculature within the lesion  
418 core (Figure 6B). By 28 days, the observed rarefication in control mice appeared virtually resolved  
419 at the location where the previous injury had been inflicted. In contrast, the lesion core in Mfn2<sup>ckO</sup>  
420 mice retained much of the alterations identified at 7 days, suggesting an impairment in vascular  
421 remodelling following injury (Figure 6B). To quantify the extent of vascularization in the injured  
422 area, we optimized a filament tracing analysis utilizing dextran labelling as a mask signal for our  
423 volumetric reconstructions (Figure 6C and S6A; see methods) and performed a post-SW time-  
424 course analysis in Mfn2<sup>WT</sup> and Mfn2<sup>ckO</sup> mice. At the earliest analysed time (3 days), we identified a  
425 similar reduction in the density of branch points as well as total length and fractional vascular  
426 volume of the network immediately surrounding the injury track (i.e., within a fixed total volume of  
427 about 0.2 mm<sup>3</sup>) as compared to uninjured conditions (Figure 6D). Yet, while by 7 days the Mfn2<sup>WT</sup>  
428 group started showing a progressive recovery of these parameters (in particular branch points)  
429 which became conspicuous by 28 days, Mfn2<sup>ckO</sup> injured cortices failed in undergoing significant  
430 improvements (Figure 6D). Interestingly, analysis of injured Mfn1<sup>ckO</sup> mice did not reveal striking  
431 dissimilarities compared to wild-type injured mice for any of the examined parameters (Figure S6B-  
432 C), in line with the fact that disruption of MFN1 expression alone did not prevent perivascular  
433 clustering of mitochondria (Figure 4K-L).

434 To gain insights into the mechanisms underlying the impaired vascular remodelling of  
435 Mfn2<sup>ckO</sup> mice, we examined their angiogenic response to injury by 7 days post-SW. Proliferating  
436 cells were quantified by supplying EdU to mice during the last 3 days before sacrifice (Figure 6E),  
437 and labelled cells examined for their positivity to the ETS-transcription factor ERG, an endothelial  
438 marker known to promote angiogenesis (Birdsey et al., 2008). Inspection of brain sections in  
439 proximity to the lesion track in Mfn2<sup>WT</sup> mice revealed a number of EdU+/ERG+ cells along CD31+  
440 vessels, indicative of neofomed vessels containing endothelial cells that did proliferate during this  
441 time (Figure 6F). Importantly, in Mfn2<sup>ckO</sup> mice the overall extent of CD31+ vessels alongside the  
442 density of EdU+/ERG+ cells appeared markedly reduced (Figure 6E and G), despite comparable  
443 numbers of total proliferating EdU+ cells as well as SOX2+ astrocytes to Mfn2<sup>WT</sup> mice (Figure S6D-  
444 F). These data were corroborated by examining the total density of astrocytes in brain sections



445 derived from injured  $Mfn2^{cKO}$  mice and control littermates expressing a Cre-dependent cytosolic  
446 tdTomato reporter (Figure S7A). Importantly, quantification of astrocyte numbers and inspection of  
447 perivascular end-feet in these tdTomato-expressing  $Mfn2^{cKO}$  mice revealed no overt changes as  
448 compared to  $Mfn2^{WT}$  mice (Figure S7A-C), ruling out possible effects due to astrocyte degeneration  
449 or prominent changes in their proliferative capacity.

450 Together, these results indicate that lack of MFN2 in reactive astrocytes compromises  
451 vascular remodelling after injury by limiting angiogenesis, while astrocyte proliferation as well as  
452 general morphology appear preserved.

453

#### 454 **Forced enrichment of mitochondria-ER contact sites in perivascular end-feet rescues** 455 **vasculature remodeling in absence of mitochondrial fusion**

456 While lack of MFN2 in reactive astrocytes is sufficient to impair the formation of new  
457 vessels after SW-injury, it still remains unclear whether this effect is mediated by defective  
458 mitochondrial fusion *per se* rather than by disrupted mitochondria-ER tethering. We thus asked  
459 whether perivascular enrichment of mitochondria-ER contact sites may be sufficient to re-establish  
460 vascular remodeling after injury. To address this question, we took advantage of a previously  
461 validated strategy to forcefully anchor mitochondria to ER membranes using a genetically-encoded  
462 synthetic linker (Csordas et al., 2006) that we expressed in  $Mfn2^{cKO}$  mice via an astrocyte-specific  
463 AAV (pAAV-hGfaABC<sub>1</sub>D-OMM-mRFP-ER) (Figure 7A). We reasoned that, since the overall extent  
464 of perivascular ER tubules appeared to large degree conserved in absence of MFN2 prior and after  
465 injury (Figure 3C-D and S4D-E), anchoring mitochondria to ER tubules before tamoxifen treatment  
466 (and *Mfn2* deletion) by means of this irreversible linker may enhance the extent of contact sites  
467 irrespective of subsequent changes in morphology and fission-fusion dynamics. The construct  
468 encoding for this linker contains a monomeric RFP fused on one side to the outer mitochondrial  
469 membrane (OMM)-targeting sequence of mAKAP1 and on the other to the ER membrane-targeting  
470 sequence of  $\gamma$ UBC6 (Figure 7A) (Csordas et al., 2006). Its expression in different cellular systems  
471 markedly expands the interface area between mitochondria and ER, resulting in mRFP labelling of  
472 the OMM (Arruda et al., 2014; Csordas et al., 2006; Csordas et al., 2010). Few weeks after

473 intracortical delivery of this AAV-linker (or its AAV control lacking the ER targeting sequence), mice  
474 were treated with tamoxifen to induce *Mfn2* deletion (Figure 7A) followed by SW-injury and  
475 mitochondrial network analysis. At the single-astrocyte level, the overall morphology of the  
476 mitochondrial network was not significantly rescued, with most mitochondria still appearing visibly  
477 fragmented even in absence of injury (Figure 7B), as expected in astrocytes lacking mitochondrial  
478 fusion. However, we noticed that the amount of mRFP+ mitochondria decorating vessel cross-  
479 sections was visibly increased in astrocytes transduced with the AAV-linker as compared to  
480 controls in both resting and injured conditions (Figure 7B-D). Importantly, this effect was  
481 independent of mitochondrial morphological changes within the end-feet, as AAV-linker expression  
482 was not able to restore tubular mitochondria (Figure S7D). To understand if this manipulation also  
483 functionally modified the microenvironment of perivascular end-feet, we introduced a cassette  
484 encoding for mitoGCamp6f in the OMM-mRFP-ER construct and performed  $Ca^{2+}$  imaging in brain  
485 slices following AAV cortical delivery *in vivo* (Figure S7E-F). Analysis of mitoGCamp6f in resting  
486 *Mfn2*<sup>ckO</sup> astrocytes revealed that AAV-linker transduction modified the extent of mitochondrial  $Ca^{2+}$   
487 uptake by increasing both the percentage of active mitochondria and their frequency dynamics  
488 (Figure 7E and Figure S7G-H) to levels almost comparable to *Mfn2*<sup>WT</sup> astrocytes (Figure 5F-G),  
489 indicating that this forced tethering was sufficient to enhance mitochondrial  $Ca^{2+}$  uptake in absence  
490 of MFN2.

491 We next analysed the extent of vasculature remodelling induced by SW-injury in the area  
492 subjected to AAV transduction. Visual inspection of CD31 immunoreactivity confirmed that non-  
493 transduced *Mfn2*<sup>ckO</sup> cortices were characterized by a less elaborated vascular network in the  
494 injured area as compared to *Mfn2*<sup>WT</sup> cortices (Figure 7F and H). Importantly, while injection of the  
495 AAV-ctrl did not overtly change the extent of CD31+ vessels by 7 days post-SW in *Mfn2*<sup>ckO</sup> mice,  
496 AAV-linker expression significantly enhanced vascular complexity to levels almost indistinguishable  
497 from those of *Mfn2*<sup>WT</sup> mice (Figure 7G and H). Accordingly, AAV-linker expression increased the  
498 number of branch points and total vascular length in *Mfn2*<sup>ckO</sup> cortices as compared to AAV-ctrl  
499 expression (Figure S7I). Together, these results indicate that, within the examined time frames,

500 forced enrichment of mitochondrial-ER tethering in *Mfn2*<sup>ckO</sup> astrocytic perivascular end-feet is  
501 sufficient to restore vascular remodelling following injury.

502

### 503 **Discussion**

504 We have shown that a profound reorganization of the mitochondrial network in astrocytes  
505 responding to acute injury underlies their ability to create a spatially defined mitochondrial-enriched  
506 domain in perivascular end-feet. Astroglial end-feet appear to be naturally enriched in elaborated  
507 mitochondrial morphologies and bundles of ER tubules, which is in line with recent observations  
508 (Mathiisen et al., 2010; Moss et al., 2016), yet during the first week that follows injury these cellular  
509 sites experience a further accumulation of mitochondria as a result of coordinated fusion-fission  
510 dynamics. While mitochondrial biogenesis or trafficking are also likely to contribute in this process,  
511 mitochondrial fusion in particular was required to promote the formation of this localized clustering  
512 as deletion of *Mfn2* not only prevented this response, but also significantly altered the extent of  
513 contact sites with the ER, thus affecting local Ca<sup>2+</sup> dynamics. Importantly, the extent of  
514 mitochondrial accumulation and ER tethering in astrocytic end-feet had direct consequences for  
515 microvasculature remodeling: while depletion of mitochondrial-ER contact sites impaired  
516 angiogenesis and vascular complexity in lesioned cortices, mitochondrial and ER-tether  
517 enrichment had opposite results and rescued vascular density even in absence of mitochondrial  
518 fusion. This finding is reminiscent of an equally enhanced accumulation of mitochondria to new  
519 axonal sprouts following axotomy experiments, a process which has implications for axon  
520 regeneration (Han et al., 2016; Mar et al., 2014; Misgeld et al., 2007). Along this line, our data  
521 support the notion that enrichment of mitochondria and mitochondria-ER contact sites in astrocytic  
522 end-feet does not simply identify a general trait of cellular reactivity but rather a mechanism that is  
523 triggered to ensure the formation of an active metabolic compartment with direct implications for  
524 vascular remodelling.

525 Our experiments performed on astrocyte-specific *Mfn2*<sup>ckO</sup> mice were specifically designed  
526 to manipulate the mitochondrial network shortly (~2 weeks) before inflicting the SW-injury, thereby  
527 allowing mice to develop and reach adulthood with normal MFN2 expression until the first day of

528 tamoxifen treatment. This time was sufficient to elicit a significant drop in MFN2 protein expression  
529 *in vivo*, which was mirrored by evident changes in mitochondrial morphology and ultrastructure.  
530 This indicates that mitofusins have a relatively rapid turnover in astrocytes and allowed us to focus  
531 on the acute effects resulting from lack of mitochondrial fusion. While this may explain the  
532 seemingly intact cristae morphology observed in *Mfn2<sup>ckO</sup>* astrocytes, in contrast to developmental  
533 knockout studies (Chen et al., 2007; Lee et al., 2012), it is of particular interest the fact that  
534 morphological changes towards circular and fragmented mitochondria were accompanied by a  
535 clear reduction in the extent of MAM domains with the ER in astrocytic end-feet. In cell lines, MFN2  
536 has been repeatedly reported to regulate the extent of tethering between these two organelles,  
537 with a pro-tethering (de Brito and Scorrano, 2008; Naon et al., 2016) rather than an anti-tethering  
538 activity (Filadi et al., 2015) being validated also in other *in vivo* studies (Luchsinger et al., 2016;  
539 Schneeberger et al., 2013). Here, a reduction in MAMs and an increased mitochondria-ER  
540 distance in astrocytes supports a similar pro-tethering role of MFN2. However, we cannot entirely  
541 exclude that these may partly develop as secondary effects due to morphological changes of the  
542 mitochondrial network in perivascular end-feet.

543         One of the key findings of our study is the observation that the enrichment of mitochondria-  
544 ER tethering within end-feet contributes to regulate the local environment surrounding  
545 microvessels *in vivo* and *ex vivo*, as revealed by  $Ca^{2+}$ -imaging experiments performed with the  
546 GCamp6f sensor. Interestingly, our analysis revealed that the end-foot is characterized by  
547 distinctive mitochondrial  $Ca^{2+}$  uptake dynamics when compared to peripheral branches of the same  
548 cell, which may be justified by the enrichment in mitochondria-ER contact sites precisely in  
549 perivascular processes. Astrocytes possess a remarkably complex  $Ca^{2+}$  activity on account of their  
550 highly ramified morphology (Bindocci et al., 2017; Shigetomi et al., 2016) and changes in the  
551 pattern of spontaneous and stimulus-induced  $Ca^{2+}$  transients have been shown to associate with  
552 synaptic transmission and vascular tone (Bindocci et al., 2017; Tran et al., 2018; Wang et al.,  
553 2006). Besides the ER, mitochondria are also well known for being integral components of  $Ca^{2+}$   
554 signalling in cells given their significant  $Ca^{2+}$  buffering capacity which is primarily regulated by the  
555 mitochondrial calcium uniporter (MCU) complex (Baughman et al., 2011; De Stefani et al., 2011).

556 Calcium uptake can potentially modify mitochondrial bioenergetics (Giorgi et al., 2018), but also the  
557 magnitude and spread of cytosolic  $\text{Ca}^{2+}$  transients and thus have important effects on key  
558 signalling events in cells, including astrocytes *in vitro* (Jackson and Robinson, 2015; Li et al., 2014;  
559 O'Donnell et al., 2016; Parnis et al., 2013; Parpura et al., 2011; Reyes and Parpura, 2008; Stephen  
560 et al., 2015) and *in vivo* (Agarwal et al., 2017). As MCU exhibits low  $\text{Ca}^{2+}$  affinity, mitochondrial  $\text{Ca}^{2+}$   
561 influx predominantly occurs at sites of elevated  $\text{Ca}^{2+}$  concentrations, i.e. mitochondria-plasma  
562 membrane and mitochondria-ER tethering domains (Hayashi et al., 2009; Rizzuto et al., 2012).  
563 Intriguingly, manipulation of MFN2 expression levels has been shown to alter mitochondrial  $\text{Ca}^{2+}$   
564 buffering capacity in cells as a consequence of its regulatory role on mitochondria-ER tethering  
565 domains (de Brito and Scorrano, 2008; Filadi et al., 2015; Luchsinger et al., 2016; Naon et al.,  
566 2016). Consistent with these earlier reports, here we find that a marked dampening of  
567 mitochondrial  $\text{Ca}^{2+}$  activity in *Mfn2<sup>ckO</sup>* astrocytes *in situ* renders these cells virtually insensitive to  
568 the changes in  $\text{Ca}^{2+}$  dynamics induced by injury, while forced expression of a mitochondria-ER  
569 synthetic linker alone is sufficient to restore  $\text{Ca}^{2+}$  uptake even in absence of mitochondrial fusion,  
570 thus indicating that tethering domains play a major role in astrocyte  $\text{Ca}^{2+}$  handling mechanisms.  
571 Importantly, while this impaired mitochondrial  $\text{Ca}^{2+}$  uptake is likely to impact local perivascular  
572 bioenergetics in *Mfn2<sup>ckO</sup>* astrocytes, it certainly translates into long-term alterations in cytosolic  
573  $\text{Ca}^{2+}$  activity which, at the level of the end-feet, manifest as  $\text{Ca}^{2+}$  transients wider and more frequent  
574 than those observed in control end-feet. It is thus tempting to speculate that these abnormal  $\text{Ca}^{2+}$   
575 transients may affect astrocytic perivascular function, including secretion of vasoactive or pro-  
576 angiogenic molecules, yet the exact consequences of this altered  $\text{Ca}^{2+}$  activity for vascular  
577 remodelling remains to be clarified. In future studies, it will thus be interesting to assess if  
578 mitochondrial  $\text{Ca}^{2+}$  uptake blockade, for instance via astrocyte-specific genetic manipulation of  
579 MCU, may also affect vascular remodelling in injury settings.

580 Unexpectedly, we found that abrogation of astrocyte MFN2 and the ensuing disruption of  
581 mitochondria-ER contact sites was sufficient to impair angiogenesis and vascular remodeling after  
582 injury. While we propose this effect to be primarily mediated by a faulty metabolic domain at the  
583 gliovascular interface, at this stage we can only argue what the exact signalling might be that

584 facilitates a vascular response in physiological conditions. Interestingly, MFN2-mediated signalling  
585 has been implicated in regulating cell proliferation cell-autonomously in vascular smooth muscle  
586 cells (Chen et al., 2004), however here we did not find overt changes in astrocyte proliferation or  
587 survival in our system. Also, the fact that astrocytes can sustain a glycolytic metabolism for  
588 extended periods of time (Supplie et al., 2017) argues against a primary role of OXPHOS in this  
589 regard. In line with this notion, and despite a partial alteration on OXPHOS components identified  
590 in our proteomics of Mfn2<sup>ckO</sup> astrocytes, we were unable to reveal major changes in TCA cycle  
591 metabolites or amino acid biosynthesis following <sup>13</sup>C<sub>6</sub>-Glucose administration *in vivo*. While these  
592 data do not completely rule out potential local changes in energy metabolism restricted to the  
593 perivascular end-feet, mitochondrial cristae ultrastructure appeared intact in Mfn2<sup>ckO</sup> reactive  
594 astrocytes even at late time points after injury, thus indicating that mitochondrial metabolism *per se*  
595 may not be strongly affected in our model. Moreover, forced induction of mitochondria-ER tethering  
596 domains via AAV-linker expression alone in Mfn2<sup>ckO</sup> mice was sufficient to restore vascular  
597 remodelling, providing additional evidence for the presence of still functional mitochondria. Thus,  
598 one intriguing possibility is that this close apposition of a dense supply of mitochondria-ER contact  
599 sites at the vascular interface may favour either the local accumulation of specific signalling  
600 molecules or contribute to generate locally a chronic metabolic environment (Al-Mehdi et al., 2012;  
601 Booth et al., 2016; Lopez-Fabuel et al., 2016), which may act non cell-autonomously in assisting  
602 the angiogenic response during the days that follow the initial insult (Wong et al., 2017).  
603 Alternatively, a steady and local supply of key astrocytic biosynthetic intermediates, as those  
604 generated by the TCA cycle (Lovatt et al., 2007), or ATP itself may contribute to keep fuelling the  
605 remodelling of the gliovascular interface (Boulay et al., 2017; Rangaraju et al., 2019) as well as  
606 restore perivascular barrier (Voskuhl et al., 2009) or clearance functions, in particular of toxic  
607 metabolic by-products (Iliff et al., 2012). Ultimately, a combination of multiple factors, possibly  
608 converging onto the localized release of pro-angiogenic signalling molecules (Sweeney et al.,  
609 2016), are likely to participate in regulating astrocyte-mediated vascular remodelling following  
610 injury.

611 In conclusion, our study provides insights into the changes in mitochondrial structure and  
612 function experienced by astrocytes during their response to cerebrovascular damage, but also it  
613 identifies an important mechanism through which these cells directly contribute to vascular  
614 remodelling in the injured brain. Successful molecular dissection of the precise metabolic pathways  
615 playing a role in this process may therefore hold promise for therapeutic interventions to ameliorate  
616 tissue repair.

617

618

619

620

621

622

623

624

625

626

627

628

629

630

631

632

633

634

635

636

637

638

639

640

641

642

643

644

645

646 **Author Contributions**

647 J.G. performed and analysed most of the experiments. E.E. contributed to MACS and FACS  
648 experiments. P.P. developed the custom algorithm for Ca<sup>2+</sup> analysis. V.S. and M.J. generated and  
649 validated AAVs. H.M.J. and A.S. contributed to experiments. K.F.D. and C.K. supported with cell  
650 sorting. A.G. and K.K.C. provided reagents. C.F. performed mass-spec and initial analysis. P.G.  
651 performed metabolomics and initial analysis. E.M. contributed to proteomic and metabolomics  
652 analysis. J.G., E.M. and M.B. prepared figures. E.M. and M.B. developed the concept, designed  
653 experiments, analysed data and wrote the paper. All authors revised the manuscript.

654

655 **Acknowledgements**

656 We thank N.G. Larsson for providing mitoYFP floxed-stop, Mfn1 floxed and Mfn2 floxed mice. M.  
657 Götz and F. Kirchhoff for Glax::CreERT2 mice. L. Uhrbom and E. Holland for hGFAP-TVA mice. T.  
658 Langer for insightful comments. E.L. Snapp for ER-targeted probes. G. Hajnoczky for synthetic  
659 linkers. N. Toni for advices on EM. I. Atanassov for support with IPA analysis. B. Fernando, T.  
660 Öztürk and S. Perin for excellent technical assistance. J. Matutat, G. Piper, D. Schneider and the  
661 other members of the CECAD in vivo facility for excellent assistance. G. Wani, S. Wendler, K.  
662 Ndoci and T. Eriksson for general lab support and discussions. All members of the CECAD  
663 imaging facility for assistance with microscopes and software. S. Müller and the team of the  
664 CECAD proteomics core facility for technical assistance. This work was supported by the Deutsche  
665 Forschungsgemeinschaft (SFB1218 A07), European Research Council (ERC-StG-2015, grant  
666 number 67844), Köln Fortune and UoC Advanced Postdoc Grant to M.B; the Deutsche  
667 Forschungsgemeinschaft (SFB1218 Z03) to A.S.; and the Deutsche Forschungsgemeinschaft  
668 (SFB870) to K.K.C. E.M. is recipient of an Advanced Postdoc Grant (Deutsche  
669 Forschungsgemeinschaft, SFB1218). C.K. acknowledges the ISAC SRL Emerging Leaders  
670 Program.

671

672 **Author Information**

673 The authors declare no competing financial interests.

674



675 **Figure legends**

676 **Figure 1. Astrocytic end-feet are enriched in mitochondria-ER contact sites. (A)** Experimental  
677 design used to express organelle-targeted fluorescent sensors in astrocytes *in vivo*. **(B)** Example  
678 of a cortical astrocyte co-transduced with ER-GFP and mitoRFP viruses. Yellow arrowheads point  
679 to the end-feet. Bar, 10  $\mu\text{m}$ . **(C)** Magnifications of the astrocyte shown in B. Yellow arrowheads  
680 point to bundles of elongated mitochondria. Bar, 5  $\mu\text{m}$ . **(D-E)** Examples of astrocytes transduced  
681 with ER-GFP (D) or mitoYFP (E) wrapping around dextran-labeled vessels. Insets show zooms of  
682 the perivascular end-foot. Side panels show a 3D rendering of the same astrocytes. Bars, 10 and  
683 25  $\mu\text{m}$ . **(F)** EM picture of a vessel cross-section showing the astrocytic end-foot (segmented black  
684 line) and its organelles (mitochondria: yellow; ER: red; contact sites: blue). The inset shows  
685 mitochondria-ER contact sites lining the basal lamina. Bars, 2 and 1  $\mu\text{m}$ . **(G)** EM picture of  
686 perisynaptic astrocytic processes and their organelles. Bar, 2  $\mu\text{m}$ . **(H)** Quantification of  
687 mitochondrial parameters in branches ( $n=21$  vessel cross-sections from 3 mice) and end-feet  
688 ( $n=32$  vessel cross-sections from 3 mice; nonparametric Mann-Whitney t-test). \*\*\*,  $p < 0.001$ . PC:  
689 pericyte; EC: endothelial cell; BL: basal lamina. See also Figure S1.

690

691 **Figure 2. Dynamic remodelling of astrocyte mitochondrial and ER networks following injury.**  
692 **(A)** Experimental design for examining the mitochondrial network in astrocytes *in vivo*. **(B)** Example  
693 of an hGFAP::CreER x R26<sup>LSL-mitoYFP</sup> mouse at 7 days after cortical SW-injury. The inset shows  
694 extravasating CD45<sup>+</sup> leukocytes in the lesion core. Bar, 150  $\mu\text{m}$ . **(C)** Surface rendering of  
695 mitochondrial networks in control astrocytes (uninjured animals) or in reactive astrocytes proximal  
696 to the lesion track. Yellow arrowheads point to the soma. Zooms depict the predominant network  
697 morphology in peripheral branches. Bar, 15  $\mu\text{m}$ . **(D)** Density plots depicting the morphological  
698 heterogeneity of the mitochondrial population in individual astrocytes under resting (Ctrl, uninjured  
699 animals) or reactive conditions (SW 7days). The proportion of fragmented mitochondria based on  
700 threshold values for mitochondrial sphericity (0.8) and length (1  $\mu\text{m}$ ) is shown. **(E)** Time-course  
701 analysis of mitochondrial fragmentation quantified as in D ( $n \geq 3$  mice/time point, with 8-15  
702 astrocytes/mouse; one-way ANOVA followed by Dunnett's post-hoc test). **(F)** Volume

703 reconstruction of mitoYFP+ astrocytes (arrowheads) surrounding dextran-labelled vessels at 7  
704 days post-SW. A single-stack is shown. Bar, 25  $\mu\text{m}$ . **(G)** Examples of vessel cross-sections  
705 showing perivascular astrocytic mitoYFP in control (uninjured animals) and injured conditions. Bar,  
706 10  $\mu\text{m}$ . **(H)** Quantification of perivascular mitoYFP density displayed as area fraction ( $n \geq 30$   
707 vessels/time-point; nonparametric Kruskal-Wallis test). **(I)** Experimental design for analyzing the  
708 astrocytic ER. **(J)** 3D example of an astrocyte expressing ER-GFP (signal density shown in  
709 pseudocolors). Bars, 10 and 5  $\mu\text{m}$ . **(K)** Quantification of the ER-GFP perivascular *g-ratio* at the  
710 indicated time-points ( $n \geq 35$  vessels/time-point; nonparametric Kruskal-Wallis test). \*\*,  $p < 0.01$ ,  
711 \*\*\*,  $p < 0.001$ . See also Figure S2.

712

713 **Figure 3. *Mfn2* deletion affects astrocytic mitochondria-ER tethering domains.** **(A)** Proposed  
714 model showing the extent of mitochondrial remodeling taking place in astrocytic end-feet during  
715 injury and the expected phenotype following *Mfn2* deletion. **(B)** Experimental design for validating  
716 *Mfn2* knock-out in astrocytes by MACS enrichment and proteomic analysis. The plot shows MFN2  
717 protein abundance in *Mfn2*<sup>ckO</sup> samples compared to other mitochondrial and classic astrocytic  
718 markers ( $n = 4$  *Mfn2*<sup>ckO</sup> mice and 3 *Mfn2*<sup>WT</sup> mice). **(C)** EM pictures of astrocytic end-feet in *Mfn2*<sup>WT</sup>  
719 and *Mfn2*<sup>ckO</sup> mice at 4 weeks post-tamoxifen treatment. Mitochondria and ER contact sites are  
720 highlighted in different colors. Right panels depict zooms of mitochondrial cristae. EC: endothelial  
721 cell; BL: basal lamina. Bars, 1  $\mu\text{m}$  and 200 nm. **(D)** Details of astrocytic end-feet showing the  
722 perivascular distribution of ER tubules and their contact sites with mitochondria in *Mfn2*<sup>WT</sup> and  
723 *Mfn2*<sup>ckO</sup> mice. Bars, 250 nm. **(E)** Quantification of the indicated ultrastructural parameters in  
724 *Mfn2*<sup>WT</sup> ( $n = 85$  vessel cross-sections from 4 mice) and *Mfn2*<sup>ckO</sup> perivascular end-feet ( $n = 145$   
725 vessel cross-sections from 3 mice; non-parametric Mann-Whitney t-test). \*\*\*,  $p < 0.001$ . See also  
726 Figure S3.

727

728 **Figure 4. *Mfn2* deletion in adult reactive astrocytes prevents perivascular clustering of still**  
729 **functional mitochondria.** **(A)** Example of cortical SW-injury in *Mfn2*<sup>ckO</sup> mice at 7 days. The inset  
730 shows CD45+ leukocytes within the lesion core. Bar, 100  $\mu\text{m}$ . **(B)** Time-course analysis of

731 mitochondrial fragmentation in Mfn2<sup>ckO</sup> and Mfn1<sup>ckO</sup> astrocytes ( $n \geq 3$  mice/time point, 8-15  
732 astrocytes/mouse; two-way ANOVA followed by Tukey's post-hoc test). **(C)** Examples of  
733 mitochondrial morphologies in astrocytes (arrowheads point to soma) proximal to the lesion site at  
734 28 days post-SW. Zooms on the right depict peripheral branches. Insets show immunoreactivity for  
735 GFAP. Bar, 20  $\mu\text{m}$ . **(D)** Top view projections (100  $\mu\text{m}$  deep) of Mfn2<sup>ckO</sup> and Mfn1<sup>ckO</sup> whole-mount  
736 injured cortices (7 days) following tissue clearing. The penetrating SW-injury site (perpendicular to  
737 the view) is indicated by a yellow dashed line on top of each panel. Middle panels depict a  
738 mitoYFP-expressing astrocyte proximal to the lesion track and nearby vessels. Right panels depict  
739 a vessel cross-section. Bars, 50, 10 and 10  $\mu\text{m}$ . **(E)** Quantification of astrocytic mitoYFP  
740 perivascular density ( $n = 3$  mice/condition, with a total of at least 80 vessel sections quantified; the  
741 contralateral uninjured sides were utilized as internal controls; one-way ANOVA followed by Holm-  
742 Sidak's post-hoc test). **(F)** Schematic illustrating the experimental protocol used for astrocyte  
743 isolation via anti-ACSA staining and cell sorting followed either by proteomic analysis. A similar  
744 approach was used to perform targeted metabolomics of mice supplied with <sup>13</sup>C<sub>6</sub>-Glucose. **(G)**  
745 Heat maps of normalized LFQ intensities of TCA cycle and associated enzymes in reactive  
746 astrocytes of Mfn2<sup>ckO</sup> and Mfn1<sup>ckO</sup> mice. Values are color-coded according to their z-score.  
747 Significant protein changes ( $-\log_{10}$  of the  $p$ -value  $\geq 1.3$ ) are indicated with an asterisk ( $n = 4$  Mfn2<sup>ckO</sup>  
748 mice, 4 Mfn1<sup>ckO</sup> mice and 3 Ctrl mice). **(H)** Atom-resolved map of the expected main isotope  
749 distribution after <sup>13</sup>C labeling (red dots indicate <sup>13</sup>C atoms) in intermediates of the TCA cycle  
750 following supplementation of <sup>13</sup>C<sub>6</sub>-Glucose (delivered by systemic injection into mice 30 minutes  
751 before sacrifice). **(I)** Relative enrichment (M.P.E) in <sup>13</sup>C-labeled species for each of the indicated  
752 TCA cycle intermediates at 4 weeks after SW ( $n = 5$  Mfn2<sup>ckO</sup> mice, 6 Mfn1<sup>ckO</sup> mice and 5 Ctrl mice;  
753 two-way ANOVA followed by Dunnett's test). **(J)** Relative enrichment in <sup>13</sup>C-labeled species for  
754 each of the indicated amino acids at 4 weeks after SW ( $n = 5$  Mfn2<sup>ckO</sup> mice, 6 Mfn1<sup>ckO</sup> mice and 5  
755 Ctrl mice; two-way ANOVA followed by Dunnett's test). **(K)** Heat maps of normalized LFQ  
756 intensities of proteins regulating Ca<sup>2+</sup> transport across the indicated organelles in reactive  
757 astrocytes of Mfn2<sup>ckO</sup> and Mfn1<sup>ckO</sup> mice. Values are color-coded according to their z-score.  
758 Significant protein changes ( $-\log_{10}$  of the  $p$ -value  $\geq 1.3$ ) are indicated with an asterisk ( $n = 4$  Mfn2<sup>ckO</sup>

759 mice, 4 Mfn1<sup>ckO</sup> mice and 3 Ctrl mice). \*,  $p < 0.05$ , \*\*,  $p < 0.01$ , \*\*\*,  $p < 0.001$ . See also Figure S3  
760 and S4.

761

762 **Figure 5. Compromised mitochondrial Ca<sup>2+</sup> uptake dynamics and abnormal cytosolic Ca<sup>2+</sup>**  
763 **activity in Mfn2<sup>ckO</sup> astrocytic end-feet. (A)** Schematic showing mitoGCaMP6f expression in  
764 astrocytes followed by 2PLSM and subsequent AstroSparks analysis. **(B)** Example of a  
765 mitoGCaMP6-expressing Mfn2<sup>WT</sup> astrocyte in brain slice following AstroSparks processing and  
766 ROI detection (ROIs in end-feet are depicted in white, branches are in red; soma was excluded).  
767 Inset displays cytosolic mCherry (co-expressed with mitoGCaMP6), utilized to identify the end-feet.  
768 Bar, 10  $\mu\text{m}$ . Right panels depicts individual ROI traces and the corresponding raster plot. **(C-D)**  
769 Quantification of mitochondrial Ca<sup>2+</sup> transients in branches and end-feet of uninjured Mfn2<sup>WT</sup>  
770 astrocytes (n= 41-53 cells collected from 3 mice). **(E)** Example of a mitoGCaMP6-expressing  
771 Mfn2<sup>ckO</sup> astrocyte with corresponding ROI traces and raster plot. Bar, 10  $\mu\text{m}$ . **(F)** Quantification of  
772 active mitochondria in Mfn2<sup>WT</sup> (n= 40-56 cells, 3 mice/condition) and Mfn2<sup>ckO</sup> (n= 36-73 cells, 2-  
773 3 mice/condition) astrocytic end-feet. **(G)** Quantification of frequency, amplitude and duration of  
774 mitochondrial Ca<sup>2+</sup> transients of the astrocytes shown in **F**. **(H)** Example of mitochondrial and  
775 cytosolic Ca<sup>2+</sup> traces. **(I)** Experimental setting utilized for Ca<sup>2+</sup> imaging of Mfn2<sup>ckO</sup> astrocytes *in*  
776 *vivo*. **(J)** Example of a GCaMP3-expressing astrocyte imaged *in vivo* following ROIs detection  
777 (excluding the soma). Bar, 20  $\mu\text{m}$ . **(K)** Examples of ROI traces and corresponding raster plots in  
778 Mfn2<sup>WT</sup> and Mfn2<sup>ckO</sup> astrocytes at 28 days post-SW. **(L)** Average frequency (end-feet) and **(M)**  
779 area of Ca<sup>2+</sup> transients quantified in Mfn2<sup>WT</sup> (n= 35-111 cells, 2-3 mice/condition) and Mfn2<sup>ckO</sup>  
780 astrocytes (n= 51-73 cells, 2-3 mice/condition). \*,  $p < 0.05$ , \*\*,  $p < 0.01$ , \*\*\*,  $p < 0.001$   
781 (nonparametric Mann-Whitney t-test). See also Figure S5.

782

783 **Figure 6. Disruption of astrocyte mitochondrial fusion dynamics impairs injury-induced**  
784 **angiogenesis and vascular remodelling. (A)** Experimental protocol used for examining the  
785 vascular network following injury. **(B)** Top views of the vascular network in reconstructed portions  
786 of Mfn2<sup>WT</sup> and Mfn2<sup>ckO</sup> cortices. Arrowheads point to the lesion tracks (penetrating lesion

787 perpendicular to the field of view). Insets depict zooms of the lesioned core region (circled in  
788 white). Bar, 200  $\mu\text{m}$ . **(C)** Pipeline used for vasculature quantification via filament tracing of the  
789 dextran signal. Bar, 30  $\mu\text{m}$ . **(D)** Quantification of branch points, fractional volume and total length of  
790 the vascular network in  $\text{Mfn2}^{\text{WT}}$  and  $\text{Mfn2}^{\text{cKO}}$  cortices ( $n=3$  mice/condition; two-way ANOVA  
791 followed by Tukey's post-hoc test). **(E)** Scheme showing the experimental timeline used for EdU  
792 labeling of proliferating cells in SW-injured animals. Lower pictures depict large views of the injured  
793 cortex in  $\text{Mfn2}^{\text{WT}}$  and  $\text{Mfn2}^{\text{cKO}}$  mice at 7 days following immunostaining for CD31 as well as EdU.  
794 Bar, 200  $\mu\text{m}$ . **(F)** Magnification of a microvessel proximal to the lesion track showing the presence  
795 of endothelial cells (CD31+/ERG+) that have incorporated EdU during the previous 3 days. **(G)**  
796 Quantification of proliferating ERG+ cells within the area surrounding the lesion track in  $\text{Mfn2}^{\text{WT}}$   
797 and  $\text{Mfn2}^{\text{cKO}}$  mice at 7 days post-SW ( $n=4-5$  mice/condition; nonparametric Mann-Whitney t-test).  
798 \*,  $p < 0.05$ , \*\*,  $p < 0.01$ , \*\*\*,  $p < 0.001$ . See also Figure S6 and S7.

799

800 **Figure 7. Forced enrichment of mitochondria-ER tethers in perivascular end-feet rescues**  
801 **vascular remodeling in injured  $\text{Mfn2}^{\text{cKO}}$  mice.** **(A)** Experimental plan for expressing the artificial  
802 mitochondria-ER linker (OMM-mRFP-ER) in  $\text{Mfn2}^{\text{cKO}}$  astrocyte *in vivo*. **(B)** Example of an AAV-  
803 linker-expressing  $\text{Mfn2}^{\text{cKO}}$  astrocyte (arrowhead points to the soma) showing mRFP-labelled  
804 mitochondria and a nearby vessel. Zooms depict the vessel cross-section. Bar, 10  $\mu\text{m}$ . **(C)**  
805 Examples of vessel cross-sections following expression of the AAV-ctrl or AAV-linker in  $\text{Mfn2}^{\text{cKO}}$   
806 astrocytes. Bar, 5  $\mu\text{m}$ . **(D)** Quantification of perivascular mRFP+ mitochondrial density displayed as  
807 area fraction ( $n \geq 21$  vessel sections; one-way ANOVA followed by Tukey's post-hoc test). **(E)**  
808 Quantification of mitochondrial  $\text{Ca}^{2+}$  uptake in  $\text{Mfn2}^{\text{cKO}}$  astrocytes following expression of  
809 mitoGCaMP6f in the AAV-ctrl and AAV-linker ( $n \geq 30$  cells; nonparametric Mann-Whitney t-test). **(F)**  
810 Examples of vasculature density (CD31+) in  $\text{Mfn2}^{\text{WT}}$  and  $\text{Mfn2}^{\text{cKO}}$  sections at 7 days post-SW  
811 (dashed line points to the lesion track). Bar, 80  $\mu\text{m}$ . **(G)** Examples of vasculature density in injured  
812  $\text{Mfn2}^{\text{cKO}}$  cortices transduced with the AAV-Ctrl or AAV-linker. Bar, 80  $\mu\text{m}$ . **(H)** CD31 area fraction in  
813  $\text{Mfn2}^{\text{WT}}$  and  $\text{Mfn2}^{\text{cKO}}$  cortical sections under the indicated conditions ( $n \geq 3$  mice/condition; one-way

814 ANOVA followed by Tukey's post-hoc test). \*,  $p < 0.05$ , \*\*,  $p < 0.01$ , \*\*\*,  $p < 0.001$ . See also Figure

815 S7.

816

817

818

819

820

821

822

823

824

825

826

827

828

829

830

831

832

833

834

835

836

837

838

839

840

841

842 **Legends to Supplemental Figures**

843 **Figure S1. Related to Figure 1. Characterization of organelle distribution across astrocytic**  
844 **territories *in vivo*. (A)** Left panel: example (confocal z-projection) of a cortical astrocyte  
845 transduced with an astrocyte-specific virus encoding for mitoRFP. The location of one astrocytic  
846 end-foot and soma (S) are depicted. Right panel: rendered image of mitoRFP (following  
847 deconvolution) of a single stack and the corresponding immunoreactivity for CD31 of nearby  
848 microvessels. Low panels shows zooms of each respective yellow boxed region. Bars, 15  $\mu$ m. **(B)**  
849 Left panel: example (confocal z-projection) of a cortical astrocyte transduced with an astrocyte-  
850 specific virus encoding for ER-GFP. The location of astrocytic end-feet and soma (S) are depicted.  
851 Right panel: rendered image of ER-GFP (following deconvolution) of a single stack and the  
852 corresponding immunoreactivity for CD31 of nearby microvessels. Low panels shows zooms of  
853 each respective yellow boxed region. Bars, 15  $\mu$ m. **(C)** Example of a cortical astrocyte transduced  
854 with an astrocyte-specific AAV encoding for a lysosomal marker (Emerald-Lamp1) and cytosolic  
855 mCherry. The location of astrocytic territories including end-foot, branches/branchlets and soma  
856 (S) is depicted. Immunostaining for CD31 shows the presence of nearby microvessels. The right  
857 panel shows the Emerald-Lamp1 channel reporting on the distribution of lysosomes. Bar, 15  $\mu$ m.  
858 **(D)** Zooms (surface rendered) of the boxed areas shown in **C**. Bar, 5  $\mu$ m. **(E)** Example of a cortical  
859 astrocyte transduced with an astrocyte-specific AAV encoding for a peroxisomal marker (mCherry-  
860 Perox) and cytosolic BFP. The location of astrocytic territories including end-foot,  
861 branches/branchlets and soma (S) is depicted. Immunostaining for CD31 shows the presence of  
862 nearby microvessels. The right panel shows the mCherry-Perox channel reporting on the  
863 distribution of peroxisomes. Bar, 15  $\mu$ m. **(F)** Zooms (surface rendered) of the boxed areas shown  
864 in **E**. Bar, 5  $\mu$ m. **(G)** Example of a portion of cortex in a brain section from tamoxifen-induced  
865  $Glast::CreER^{T2} \times R26^{LSL-tdTomato}$  mice immunostained for the endothelial marker CD31, showing the  
866 extent of perivascular end-feet wrapping around the vasculature. Bar, 50  $\mu$ m. **(H)** EM picture of a  
867 similar specimen as in **G** following immuno-gold processing against RFP. A superimposed red  
868 shadow identifies the location of the perivascular end-foot enriched in gold particles. The zoom on

869 the right illustrates the localization of gold particles within the end-foot surrounding the basal  
870 lamina.

871

872 **Figure S2. Related to Figure 2. Remodeling of astrocyte mitochondrial and ER networks**

873 **following SW-injury. (A)** Example of brain section from tamoxifen-induced hGFAP::CreER<sup>TM</sup> x

874 R26<sup>LSL-mitoYFP</sup> mice immunostained for the astrocytic marker S100 $\beta$ . Left inset: zoom of a single

875 S100 $\beta$ +/mitoYFP+ astrocyte. Right inset: quantification of recombination efficiency in the cortex.

876 Bars, 20  $\mu$ m. **(B)** Examples of mitoYFP+ astrocytes in control (uninjured) and injured conditions

877 (SW 7 days, astrocyte proximal to the lesion track) showing the presence of CD45+ leukocytes

878 (labeled in cyan) after SW injury. Bars, 15  $\mu$ m. **(C)** Examples of a mitoYFP+ (left) and an ER-GFP+

879 (right) astrocyte following injury (SW 7 days) showing co-labeling for the endothelial marker CD31.

880 Zooms of the boxed regions depict the end-foot. Bar, 20  $\mu$ m. **(D)** Quantification of astrocytic

881 mitochondrial mass (total mitoYFP volume per astrocyte) in control (uninjured conditions, time 0) or

882 following stab-wound injury (SW) at 7 and 28 days. Mitochondrial mass was normalized to that of

883 control astrocytes at time 0. N= 22 (time 0), 32 (time 7 days) and 29 (time 28 days) astrocytes

884 obtained from 3 different mice for each time point (one-way ANOVA followed by Kruskal-Wallis

885 test). **(E)** Density of mitoYFP+ signal in peripheral branches of resting or reactive astrocyte at the

886 indicated conditions (n $\geq$  33 astrocytes obtained from 3 mice/condition) (one-way ANOVA followed

887 by Kruskal-Wallis test). **(F)** Scheme depicting the approach utilized for FACS and proteomic

888 analysis of astrocytes following SW-injury. **(G)** Heat maps of normalized LFQ (label-free

889 quantification) intensities of detected proteins regulating mitochondrial fission and fusion dynamics

890 at the indicated time points after injury and color-coded according to their z-score (n= 6 mice per

891 time point). **(H)** Heat maps of normalized LFQ (label-free quantification) intensities of detected

892 proteins associated to mitochondrial biogenesis (Tfam and Nrf1) as well as with mitochondrial

893 mass (Timm and Tomm proteins) (n= 6 mice per time point). Significant changes (-log<sub>10</sub> of the *p*-

894 value  $\geq$ 1.3) are indicated with an asterisk. **(I)** Examples of a reconstructed ER-GFP astrocyte

895 (same as Figure 2J) following volume masking, segmentation of the indicated compartments (end-

896 feet, soma and branches) and subsequent fractionation of the ER-GFP signal in each of these



897 compartments to obtain the signal densities displayed in panel L. Bar, 20  $\mu\text{m}$ . **(J)** Quantification of  
898 vessel diameter in the same dataset utilized to examine the ER-GFP perivascular g-ratio of Figure  
899 2K. The plot shows data collected during a time course ranging from time 0 (uninjured) to 28 days  
900 after injury ( $n \geq 35$  vessels/time-point; nonparametric Kruskal-Wallis test). **(K)** 3D examples of ER-  
901 GFP labelled reactive astrocytes at 7 and 28 days post-SW. Volume segmentation into end-feet  
902 (according to direct contact with the labelled vasculature), soma and branches is shown in different  
903 colors. Lower panels depict the ER-GFP signal density in pseudocolors. A zoom of a perivascular  
904 end-foot is shown. Bars, 10  $\mu\text{m}$ . **(L)** Quantification of the fractional ER-GFP signal density across  
905 the three indicated astrocytic compartments in uninjured ( $n = 15$  cells, 3 mice) or injured (7 days,  
906  $n = 13$  cells, 3 mice; 28 days,  $n = 22$  cells, 2 mice) astrocytes. **(M)** Quantification of ER-GFP total  
907 volume per astrocyte. Right graph: average number of end-feet for the analysed ER-GFP  
908 expressing astrocytes as in L (one-way ANOVA followed by Dunn's post-hoc test). \*,  $p < 0.05$ , \*\*,  $p$   
909  $< 0.01$ , \*\*\*,  $p < 0.001$ .

910

911 **Figure S3. Related to Figure 3 and 4. Label-free proteomic analysis of reactive *Mfn2*<sup>ckO</sup> and**  
912 ***Mfn1*<sup>ckO</sup> astrocytes responding to SW-injury. (A)** Scheme showing the genotyping approach  
913 used for validating the conditional knock-out of *Mfn1* and *Mfn2* in cortical astrocytes *in vivo*. **(B)**  
914 Genotyping of isolated cortices from tamoxifen-induced *Mfn1*<sup>ckO</sup>, *Mfn2*<sup>ckO</sup> and relative control  
915 littermates (*Mfn1*<sup>WT</sup> and *Mfn2*<sup>WT</sup>). The upper gels report on the genotyping protocol to detect wild-  
916 type and floxed alleles for each gene, while the lower gels report on the deletion (knock-out) band  
917 originating from recombined astrocytes. **(C)** Volcano plot of *Mfn2*<sup>ckO</sup> reactive astrocytes (~3280  
918 detected proteins, ~2500 quantified) showing their relative expression levels ( $\log_2$  fold change)  
919 compared to reactive *Mfn2*<sup>WT</sup> (Ctrl) astrocytes obtained from tamoxifen-induced littermates.  
920 Proteins with a  $p$ -value  $\leq 0.05$  (i.e.  $\geq 1.3$  on the  $-\log_{10}$  scale) are considered significant. Proteins  
921 annotated in the Mitocarta 2.0 are outlined in red ( $n = 4$  *Mfn2*<sup>ckO</sup> mice and 3 Ctrl mice). **(D)** Heat  
922 map of normalized LFQ intensities of astrocytic markers of reactivity identified in our proteomics  
923 dataset and color-coded according to their z-score. Significant changes ( $-\log_{10}$  of the  $p$ -value  $\geq 1.3$ )  
924 are indicated with an asterisk at the beginning of each row. **(E)** Plot showing the increased

925 expression of MFN2 in sorted *Mfn1*<sup>ckO</sup> astrocytes at 28 days following injury. The left column  
926 reports on the distribution of the whole proteome in *Mfn1*<sup>ckO</sup> astrocytes. MFN2 expression is  
927 significantly up-regulated under these conditions (\*\*, *p* value <0.01). **(F)** Ingenuity Pathway  
928 Analysis (IPA) of the proteome of *Mfn2*<sup>ckO</sup> and *Mfn1*<sup>ckO</sup> astrocytes disclosing significantly up- (red)  
929 and down-regulated (blue) pathways (bars indicate the  $-\log_{10}$  of the *p*-value starting with a  
930 minimum cut-off of 1.3). Besides several shared pathways, *Mfn2*<sup>ckO</sup>-specific up-regulated pathways  
931 included Wnt/ $\beta$ -catenin, Insulin Receptor Signaling, Methylmalonyl and 2-oxanobutanoate  
932 Degradation and Ca<sup>2+</sup> Transport. Of the down-regulated pathways, OXPHOS and Regulation of  
933 eIF4 and p70S6K Signaling appeared to be specific for *Mfn2*<sup>ckO</sup> astrocytes (*n*= 4 *Mfn2*<sup>ckO</sup> mice, 4  
934 *Mfn1*<sup>ckO</sup> mice and 3 Ctrl mice). **(G)** Heat maps of normalized LFQ (label-free quantification)  
935 intensities of detected OXPHOS complex subunits (complexes I to V) color-coded according to  
936 their *z*-score (*n*= 4 *Mfn2*<sup>ckO</sup> mice, 4 *Mfn1*<sup>ckO</sup> mice and 3 Ctrl mice). Significant changes ( $-\log_{10}$  of the  
937 *p*-value  $\geq 1.3$ ) are indicated with an asterisk at the beginning of each row. **(H)** Heat maps of  
938 normalized LFQ intensities of detected proteins associated to mitochondrial stress responses  
939 color-coded according to their *z*-score. Significant changes ( $-\log_{10}$  of the *p*-value  $\geq 1.3$ ) are  
940 indicated with an asterisk at the beginning of each row.

941

942 **Figure S4. Related to Figure 4. Mitochondrial network changes in astrocytes following**  
943 **deletion of *Mfn2* or *Mfn1*.** **(A)** Surface rendering examples of mitochondrial morphologies  
944 detected in Ctrl, *Mfn2*<sup>ckO</sup> and *Mfn1*<sup>ckO</sup> resting astrocytes (i.e., uninjured animals). Yellow  
945 arrowheads point to the soma. Zooms of the boxed areas depict the predominant network  
946 morphology in peripheral processes. Bar, 15  $\mu$ m. **(B)** Examples of ER-RFP+ resting astrocytes  
947 (i.e., in uninjured mice) showing the distribution of the ER in relation to CD31 immunostaining.  
948 Yellow arrowheads point to the soma. Zooms of the boxed regions depict the end-feet. Bar, 20  $\mu$ m.  
949 **(C)** Top panels: 3D volume reconstructions showing Ctrl, *Mfn2*<sup>ckO</sup> and *Mfn1*<sup>ckO</sup> astrocytes  
950 (arrowheads point to the soma) surrounding dextran-labelled vessels at 7 days post-SW. Bottom  
951 pictures show single-stack views highlighting the extent of perivascular mitochondria for each  
952 condition. Bar, 20  $\mu$ m. **(D)** EM pictures of astrocytic end-feet in *Mfn2*<sup>WT</sup> and *Mfn2*<sup>ckO</sup> mice at 4

953 weeks post-SW, showing the extent and morphology of perivascular mitochondria. Images were  
954 taken in proximity to the lesion track. Insets depict zooms of mitochondrial cristae. EC: endothelial  
955 cell; BL: basal lamina. Bars, 500 nm. **(E)** Details of astrocytic end-feet showing the morphology of  
956 ER tubules in Mfn2<sup>WT</sup> and Mfn2<sup>CKO</sup> mice. Bar, 500 nm. **(F)** Quantification of the indicated  
957 ultrastructural parameters in Mfn2<sup>WT</sup> (n= 18 vessel cross-sections from 3 mice) and Mfn2<sup>CKO</sup>  
958 perivascular end-feet (n= 24 vessel cross-sections from 3 mice; non-parametric Mann-Whitney t-  
959 test). \*\*\*, p < 0.001.

960

961

962 **Figure S5. Related to Figure 5. Mitochondrial and cytosolic Ca<sup>2+</sup> dynamics in Mfn2<sup>CKO</sup>**  
963 **astrocytes. (A)** Schematic illustrating the experimental protocol used to transduce astrocytes in  
964 hGFAP-TVA mice with an EnvA-RABV encoding for the photoactivatable mito-GFP sensor (mito-  
965 PA-GFP). Seven days after virus delivery, 2PLSM in fresh brain slices was utilized to assess  
966 mitochondrial fusion dynamics in transduced cortical astrocytes. ROI photoactivation in selected  
967 astrocytic processes was achieved by laser illumination in the UV range (840 nm at 10% of laser  
968 power for 10 seconds), which resulted in bright GFP emission. Time-lapse was performed to follow  
969 the fate of the photoactivated mitochondria, which in case of fusion occurring would lead to sudden  
970 appearance in the GFP channel of “new” (non-photoactivated) mitochondria, with concomitant  
971 dilution of GFP signal intensity in initially photoactivated mitochondria undergoing fusion. **(B)**  
972 Example of a mito-PA-GFP-expressing astrocyte surrounded by small and large vessels (indicated  
973 by yellow arrows) recognizable by the characteristic mitochondrial outlining into tube-like  
974 structures. The laser intensity utilized for GFP detection (920 nm) was slightly increased during  
975 preliminary acquisition to identify the morphological appearance of weak PA-GFP-expressing  
976 mitochondria along processes and putative end-feet. Boxed areas point to selected ROIs prior  
977 photoactivation. Panels on the right depict selected time points of the z-scan time-lapse which was  
978 carried out for at least 1 hour following initial photoactivation (for time-lapse, the laser was tuned  
979 back to 920 nm with intensity lower than 1%, one z-scan every 3 minutes). Following z-stack image  
980 registration, direct comparison of GFP signal between time points was examined manually.

981 Arrowheads point to fusion events, which are recognizable by the abrupt decrease in GFP intensity  
982 in photoactivated mitochondria due to GFP dilution into the newly appearing (fusing) mitochondria.  
983 Mitochondria that were identified for simply moving away from the photoactivated ROI and did not  
984 satisfy these parameters were not considered in our quantification. Bar, 20  $\mu\text{m}$ . **(C)** Quantification  
985 of fusion rates in astrocytic end-feet and branches over the course of 1 hour of imaging (n= 17  
986 astrocytes from 4 mice). Note the overall low fusion rate under resting conditions in both branches  
987 and end-feet. **(D)** Schematic showing AAV-mediated cytoGCaMP6f expression in astrocytes  
988 followed by 2PLSM in slices and subsequent AstroSparks analysis. **(E)** Example of cytoGCaMP6-  
989 expressing astrocytes in brain slice following AstroSparks processing and ROI detection (ROIs in  
990 end-feet are depicted in white). Right panels depict ROI traces and corresponding raster plots. Bar,  
991 20  $\mu\text{m}$ . **(F)** Quantification of cytosolic  $\text{Ca}^{2+}$  transients in astrocytic end-feet of wild-type (Ctrl),  
992  $\text{Mfn2}^{\text{cKO}}$  and  $\text{Mfn1}^{\text{cKO}}$  astrocytes under the indicated conditions (n $\geq$  20 cells from 2-3 different mice  
993 per time and condition). **(G)** Frequency of cytosolic and mitochondrial  $\text{Ca}^{2+}$  transients within  
994 branches of  $\text{Mfn2}^{\text{cKO}}$  astrocytes quantified utilizing the indicated sensors and under the specified  
995 conditions (n $\geq$  20 cells from 2-3 mice per time and condition). \*, p < 0.05, \*\*, p < 0.01, \*\*\*, p <  
996 0.001 (non-parametric Mann-Whitney t-test).

997

998 **Figure S6. Related to Figure 6. Assessment of cell proliferation in injured  $\text{Mfn2}^{\text{cKO}}$  mice. (A)**  
999 Example of reconstructed cortical vascular network following filament tracing (in white). Systematic  
1000 inspection of the traced network led to the identification of potential artifacts (false segments, in  
1001 yellow), which were corrected by manual selection and subsequent elimination. Bar, 100  $\mu\text{m}$ . **(B)**  
1002 Top views of control and  $\text{Mfn1}^{\text{cKO}}$  cleared cortices showing the extent of dextran-filled vasculature  
1003 at 7 days post-SW. Arrowheads point to the lesion track. Insets depict zooms of the lesioned core  
1004 region (circled in white). Bar, 200  $\mu\text{m}$ . **(C)** Quantification of branch points, fractional volume and  
1005 total length of the vascular network in  $\text{Mfn1}^{\text{WT}}$  and  $\text{Mfn1}^{\text{cKO}}$  cortices (n= 3-4 mice/condition; two-way  
1006 ANOVA followed by Tukey's post-hoc test). **(D)** Pictures depicting large views of the injured cortex  
1007 in  $\text{Mfn2}^{\text{WT}}$  and  $\text{Mfn2}^{\text{cKO}}$  mice at 7 days post-SW and following immunostaining for the nuclear  
1008 marker SOX2 (labeling astrocytes) as well as EdU. Insets show co-localization of EdU with SOX2

1009 (indicated by yellow arrowheads). Bar, 100  $\mu\text{m}$ . **(E)** Quantification of total proliferating cells (upper  
1010 graph) as well as proliferating astrocytes (SOX2+/EdU+) within the area surrounding the lesion  
1011 track in Mfn2<sup>WT</sup> and Mfn2<sup>ckO</sup> mice at 7 days post-SW (n= 4-5 mice/condition; nonparametric Mann-  
1012 Whitney t-test). **(F)** Fraction of endothelial (ERG+) as well as astrocytic (SOX2+) cells being double  
1013 positive for EdU within the area surrounding the lesion track in Mfn2<sup>WT</sup> and Mfn2<sup>ckO</sup> mice at 7 days  
1014 post-SW (n= 4-5 mice/condition; nonparametric Mann-Whitney t-test). \*, p < 0.05, \*\*, p < 0.01, \*\*\*,  
1015 p < 0.001.

1016

1017 **Figure S7. Related to Figure 6 and 7. Analysis of astrocytic mitochondrial morphology and**  
1018 **Ca<sup>2+</sup> dynamics following synthetic linker expression. (A)** Examples of Mfn2<sup>ckO</sup> brain sections  
1019 (obtained from Mfn2<sup>lox/lox</sup> x Glax::CreERT2 x R26<sup>LSL-tdTomato</sup>) and corresponding control samples  
1020 bearing tdTomato fluorescence in astrocytes. Brain sections were immunostained for the  
1021 endothelial marker CD31 in order to reveal the vascular network at 7 days following SW-injury. Bar,  
1022 100  $\mu\text{m}$ . **(B)** Zoom of reactive tdTomato+ astrocytes at 7 days post-SW in close proximity to the  
1023 lesion. Pictures depict the polarized morphology of Mfn2<sup>WT</sup> and Mfn2<sup>ckO</sup> reactive astrocytes and a  
1024 comparable extent of perivascular wrapping around the CD31+ vessels. Bar, 10  $\mu\text{m}$ . **(C)**  
1025 Quantification of astrocyte density within the injured cortices of Mfn2<sup>WT</sup> and Mfn2<sup>ckO</sup> tdTomato-  
1026 expressing mice (n= 4 mice per condition; nonparametric Mann-Whitney t-test). **(D)** Quantification  
1027 of perivascular mitochondrial fragmentation (i.e., fraction of perivascular fragmented mitochondria  
1028 as calculated in Figure 2D) in Mfn2<sup>ckO</sup> astrocytes following transduction with AAV-ctrl or AAV-linker  
1029 (n= 3 mice per condition; one-way Anova followed by Dunn's multiple comparison). **(E)** Scheme  
1030 showing the AAV constructs utilized to express mitoGCaMP6f in tandem with OMM-mRFP-ER (or  
1031 its control, OMM-mRFP) in astrocytes. **(F)** Experimental design showing AAV delivery followed by  
1032 2PLSM in slices and mitochondrial Ca<sup>2+</sup> uptake analysis via AstroSparks. **(G)** Example of  
1033 mitoGCaMP6-expressing Mfn2<sup>ckO</sup> astrocytes in brain slice transduced with either AAV-linker or  
1034 AAV-ctrl and following AstroSparks processing and ROI analysis (ROIs in the end-feet are  
1035 depicted in white, while the processes appear in red). Right panels depicts ROI traces and  
1036 corresponding raster plots. Bar, 20  $\mu\text{m}$ . **(H)** Quantification of the amplitude and duration of

1037 mitochondrial  $\text{Ca}^{2+}$  events in branches and end-feet of  $\text{Mfn2}^{\text{cKO}}$  astrocytes transduced with the  
1038 AAV-linker or AAV-ctrl ( $n \geq 29$  cells per time and condition). **(I)** Analysis of branching points and  
1039 total vessel length in CD31 immunostained brain sections obtained from  $\text{Mfn2}^{\text{WT}}$  and  $\text{Mfn2}^{\text{cKO}}$   
1040 injured mice ( $n = 3$  mice/condition; nonparametric Mann-Whitney t-test). \*,  $p < 0.05$ , ns, not  
1041 significant.

1042

1043

1044

1045

1046

1047

1048

1049

1050

1051

1052

1053

1054

1055

1056

1057

1058

1059

1060

1061

1062

1063

1064

1065 **Methods**

1066

1067 Animal subjects. Six to 8-week old C57BL/6 and transgenic mice of mixed genders were used for  
1068 stereotactic injections, SW-injury, tamoxifen treatments, slice and *in vivo* imaging. Mice were  
1069 housed in groups of up to 5 animals per cage supplied with standard pellet food and water *ad*  
1070 *libitum* with a 12 h light/dark cycle, while temperature was controlled to 21-22°C. Mice carrying the  
1071 loxP-flanked genes *Mfn1<sup>fl/fl</sup>* (Lee et al., 2012) and *Mfn2<sup>fl/fl</sup>* (Lee et al., 2012) were crossed with the  
1072 inducible hGFAP-Cre<sup>ERTM</sup> (Chow et al., 2008) line and subsequently to the Cre-dependent  
1073 mitochondrial-targeted mitoYFP (Sterky et al., 2011) or GCamp3 reporter (Zariwala et al., 2012).  
1074 For validation experiments, *Mfn2<sup>fl/fl</sup>* mice were crossed with the astrocyte-specific Glast-Cre<sup>ERT2</sup> line  
1075 (Mori et al., 2006) in combination with the inducible tdTomato reporter (Madisen et al., 2010). For  
1076 experiments involving the use of an EnvA-modified Rabies virus to express fluorescent indicators  
1077 specifically in astrocytes, hGFAP-TVA mice (Holland and Varmus, 1998) expressing the avian  
1078 membrane-bound TVA receptor under the control of human GFAP promoter were used. All  
1079 experimental procedures were performed in agreement with the European Union and German  
1080 guidelines and were approved by the State Government of North Rhine Westphalia.

1081

1082 Tamoxifen treatments. Mice were intraperitoneally injected with tamoxifen (40 mg/ml dissolved in  
1083 90% corn oil and 10% ethanol) once a day for a maximum of 5 consecutive days. All subsequent  
1084 experiments were performed at least one week after the last tamoxifen injection. The exact time  
1085 frames are indicated in the text for individual experiments.

1086

1087 Stereotactic procedures and viral injections. Mice were anesthetized by intraperitoneal injection of  
1088 a ketamine/xylazine mixture (130 mg/kg body weight ketamine, 10 mg/kg body weight xylazine),  
1089 treated subcutaneously with Carprofen (5 mg/kg) and fixed in a stereotactic frame provided with a  
1090 heating pad. A portion of the skull covering the somatosensory cortex (from Bregma: caudal: -2.0;  
1091 lateral: 1.8) was thinned with a dental drill avoiding to disturb the underlying vasculature. For  
1092 unilateral SW-injury, a stainless steel lancet was slowly inserted into the cortex to a depth of  
1093 0.8 mm, moved 1 mm caudally and then slowly removed. For virus injection a finely pulled glass

1094 capillary was inserted through the dura (-0.6 to -0.3 from Bregma) and a total of 200-300 nl of virus  
1095 were slowly infused via a manual syringe (Narishige) in multiple vertical steps spaced by 50-  
1096 100  $\mu\text{m}$  each during a time window of 10-20 minutes. After infusion, the capillary was left in place  
1097 for few additional minutes to allow complete diffusion of the virus. After capillary removal, the scalp  
1098 was sutured and mice were placed on a warm heating pad until full recovery. Physical conditions of  
1099 the animals were monitored daily to improve their welfare before euthanize them. For cranial  
1100 window implantation, anesthetized mice received a pre-emptive subcutaneous injection with  
1101 Carprofen (5 mg/kg) and dexamethasone (0.25 mg/kg). The scalp was removed and the underlying  
1102 connective tissue was cleared from the skull. A circular craniotomy (3 mm in diameter) was  
1103 performed over the posterior parietal cortex using a dental drill and avoiding to disturb the  
1104 underlying vasculature. During the whole procedure, a saline solution was flushed onto the area  
1105 exposed with the craniotomy. A sterile 3 mm circular glass coverslip (#1 thickness, Warner  
1106 Instruments) was gently implanted into the craniotomy site and sealed in place with a thin layer of  
1107 Sylgard (Sigma) before applying dental cement (Dentalon plus, Heraeus Kulzer GmbH) to fix the  
1108 coverslip and cover the surrounding exposed skull. An aluminium chamber plate (CP-1, Narishige)  
1109 was fixed with cement on top of the cover glass to facilitate mouse head immobilization at the 2-  
1110 photon microscope via a head holder (MAG-2, Narishige). A single tail vein injection of 50  $\mu\text{l}$   
1111 Dextran Texas Red (70 kDa, Thermo Fisher, D1864) in saline was used to label the brain  
1112 vasculature in anesthetized animals. The depth of anaesthesia was assessed throughout the  
1113 surgery and recording time (usually 1-2 hours) and eventually mice received one or more  
1114 additional boluses of anaesthetic each corresponding to one third of the initial dose.

1115

1116 *Viral production.* Construction of the glycoprotein (G protein) gene-deleted RABV (SAD $\Delta$ G-  
1117 mCherry) and virus rescue from pHH-SAD $\Delta$ G-mCherry SC has been described before (Ghanem et  
1118 al., 2012). cDNAs encoding organelle-targeted fluorescent protein genes were used replace the  
1119 mCherry ORF of using unique NheI/NotI restriction sites. RABV $\Delta$ G-mito-tagRFP and RABV $\Delta$ G-  
1120 mito-PA GFP contains the pre-peptide of human ornithine carbamoyltransferase fused to the N  
1121 terminus of tagRFP (Yi et al., 2017) or PA-GFP. ER-targeted GFP contains an N-terminal ER



1122 retention sequence (KDEL-GFP, kindly provided by E. Snapp). Viruses pseudotyped with the  
1123 homologous SAD G glycoprotein were amplified in BSR MG-on cells complementing the G  
1124 deficiency of the virus upon induction of G expression by doxycycline (Finke et al., 2003) and  
1125 viruses pseudotyped with the EnvA protein in BHK-EnvARGCD cells expressing an ASLV-A  
1126 envelope protein comprising the RABV G cytoplasmic tail (Wickersham et al., 2007). The G- or  
1127 EnvA-coated virus was concentrated by ultracentrifugation and used for *in vivo* injection. Plaque-  
1128 forming unit (pfu) number titration was performed by infecting BHK-wt cells and HEK293T-TVA  
1129 cells with G-coated virus and EnvA-coated virus, respectively. Helper-free AAV vectors were either  
1130 obtained from Vector Biolabs as custom projects or produced according to standard  
1131 manufacturer's instructions (Cell Biolabs). Briefly, 293AAV cells were transiently transfected with a  
1132 transfer plasmid carrying the desired transgenes along with a packaging plasmid encoding the AAV1  
1133 capsid proteins and a helper plasmid, using the calcium phosphate method. Crude viral  
1134 supernatants were obtained via lysing cells in PBS by freeze-thaw cycles in a dry ice/ethanol bath.  
1135 The AAV vectors were purified by discontinuous iodixanol gradient ultracentrifugation (24h at  
1136 32,000 rpm and 4°C) and concentrated using Amicon ultra-15 centrifugal filter units. Genomic  
1137 titres were determined by real-time qPCR.

1138

1139 *In vivo and ex vivo imaging.* Isolated brains were placed in ice-cold, carbogen-saturated (5% CO<sub>2</sub>,  
1140 95% O<sub>2</sub>, pH 7.4) artificial cerebrospinal fluid (ACSF) containing (in mM): 125 NaCl, 2.5 KCl, 1.25  
1141 NaH<sub>2</sub>PO<sub>4</sub>, 25 NaHCO<sub>3</sub>, 25 Glucose, 0.5 CaCl<sub>2</sub> and 3.5 MgCl<sub>2</sub> (osmolarity of 310-330). 270-300 µm  
1142 thick coronal slices were obtained using a vibratome (Micron, HM 650V) and transferred into a pre-  
1143 incubation chamber maintained at room temperature and containing ACSF supplemented with  
1144 1 mM CaCl<sub>2</sub> and 2 mM MgCl<sub>2</sub>. During imaging, slices were moved in a dedicated imaging chamber  
1145 and experiments were conducted under continuous ACSF perfusion at a constant temperature of  
1146 32-33°C. Imaging in slices and *in vivo* was performed using a multiphoton laser-scanning  
1147 microscope (TCS SP8 MP-OPO, Leica Microsystems) equipped with a Leica 25x objective  
1148 (NA 0.95, water) and a Ti:Sapphire laser (Chameleon Vision II, Coherent). For Calcium imaging,  
1149 detection of fluorescence changes of the GCaMP6f sensor in single astrocytes was achieved by

1150 tuning the laser to 920 nm. This wavelength also allowed simultaneous recording of Dextran Red  
1151 signal in experiments *in vivo*. Two internal HyD detectors (FITC: 500-550 nm, TRITC: 565-605 nm)  
1152 were utilized to monitor GCaMP6 and Dextran Red signals. Typical recording sessions consisted in  
1153 3-5 min of continuous imaging (resolution of 1024x1024 pixels and zoom of 1 or 5) with a frame  
1154 rate of 1.16 frames /s (0.86 s/frame). Analysis of Ca<sup>2+</sup> transients acquired with higher frame rates  
1155 (up to 10 Hz) yielded comparable results in terms of frequency, amplitude and duration of events,  
1156 but worsened the overall image quality. For mito-PA-GFP experiments, photoactivation of selected  
1157 ROIs of individual astrocytes was carried out by tuning the 2-photon laser to 840 nm (10% of laser  
1158 power for 10-20 seconds), while time-lapse imaging was performed utilizing GFP excitation  
1159 (920nm) and an internal HyD detector (FITC: 500-550 nm). Usually 2-3 ROIs of identical size per  
1160 astrocytes were selected in the end-feet and branches and, after photoactivation, the whole  
1161 astrocyte volume (inter-stack interval of 1 μm) was imaged over the course of at least 1h every 3  
1162 minutes. Only astrocytes located at least 20-30 μm below the slice surface, with a general healthy  
1163 appearance throughout the recording time (i.e., absence of visibly fragmented mitochondria) and  
1164 whose acquisitions displayed only no or a minor spatial drift in xyz during the whole imaging  
1165 session were included in subsequent analysis. Acquired time points were then merged in a 4D  
1166 hyperstack in ImageJ and the resulting 3D volumes registered utilizing the “Correct 3D drift” plugin  
1167 in ImageJ. Quantification of fusion events was performed manually by inspecting the volumes  
1168 including and surrounding the photoactivated ROIs. Fusion events were identified by the abrupt  
1169 decrease in GFP intensity in directly photoactivated mitochondria due to GFP dilution into the  
1170 newly appearing (fusing) mitochondria that were not initially photoactivated. In rare cases,  
1171 mitochondria that simply moved away or through the photoactivated ROIs and did not satisfy these  
1172 fusion parameters were not considered in our quantification.

1173

1174 Calcium imaging analysis via AstroSparks. Time-lapse image sequences were drift-corrected by  
1175 utilizing the “fast & rigid body” options of the TurboReg plugin  
1176 (<http://bigwww.epfl.ch/thevenaz/turboreg/>) in ImageJ, aligning each frame to a median projection of  
1177 eleven frames centered on the middle of the time series. In case of non-satisfactory results, the

1178 moco plugin (<https://github.com/NTCColumbia/moco>) was used alternatively. The image sequence  
1179 was then cropped to exclude border regions that were not acquired throughout the whole recording  
1180 period. The noise was reduced with an isotropic ( $\sigma = 2$  px, xyt) Gaussian Blur filter. Next, only  
1181 pixels with a median intensity or a peak intensity in a median filtered (radius: 5 px) and background  
1182 corrected (Subtract Background plugin, options: "rolling=500 sliding disable") image exceeding the  
1183 threshold of 5 (a.u.) were considered for further analysis. Based on a standard deviation (SD)  
1184 projection, the FindFoci plugin identified regions of interest (ROIs). The threshold was set to the  
1185 mean + 3x SD intensity of pixels identified as background by the "IsoData" auto-threshold. ROIs  
1186 included all neighboring pixels with an intensity higher than a per ROI threshold of: (maximum  
1187 intensity – background) x 0.4 + background, to compensate for the spreading of bright signals.  
1188 ROIs smaller than  $0.3 \mu\text{m}^2$  were excluded (in case of the mitoGCaMP6 script, the plugin was used  
1189 on a median projection to include high, yet stable signals, meaning all mitochondrial ROIs). Next  
1190 the  $\Delta F/F$  was calculated based on a median projection reference. ROIs with a high  $\Delta F/F$  were  
1191 additionally identified by the FindFoci plugin on a mean filter (radius: 5 px) smoothed maximum  
1192 projection. Finally, all ROIs were projected onto each other and overlapping ROIs were combined.  
1193 Once ROIs were identified, the area and average intensity per ROI and time point were handed to  
1194 IgorPro (v7.0.4.1, WaveMetrics, Inc., Lake Oswego, Oregon 97035, USA). Custom written routines  
1195 identified the duration, amplitude, and frequency of events deviating from baseline. In order to  
1196 correct for bleaching, all traces were averaged and fitted with an exponential decay function.  
1197 Based on this reference all traces were corrected. The baseline was identified as follows: the  
1198 average intensity per ROI was smoothed with a mean-sliding box algorithm (width: 3 time frames).  
1199 The obtained values were sorted in ascending order and for each rank the standard deviation  
1200 including all lower ranking values was calculated. To define the threshold at which the SD suddenly  
1201 increases, i.e. when values start to deviate from baseline and thus increase the SD, the difference  
1202 in SD (smoothed with a mean-sliding box algorithm (width: 3 frames)) between subsequent ranks  
1203 was calculated. The rank, at which half maximal difference was reached for the first time, marks  
1204 the threshold. If the threshold contained less than 15% of all values, the whole trace was defined  
1205 as baseline. Its mean was used to calculate  $\Delta F/F$ . In order to identify events, the 20% quantile (of 7

1206 sliding frames) needed to exceed the 80% quantile (of 11 sliding frames) with a time lag of 2.58 s  
1207 (3 frames) by 1.5 x the SD of the low-cut frequency-filtered (0.2 Hz)  $\Delta F/F$  trace. For all those  
1208 events, the end was defined as the earlier time point at which the  $\Delta F/F$  trace crossed zero or  
1209 crossed the  $\Delta F/F$  level just prior to the start of the event.

1210

1211 Tissue clearing. To assess the structure of the organelles and vasculature in intact cortices, the  
1212 tissue was cleared using the short *ScaleS* protocol described previously (Hama et al., 2011).  
1213 Following brain isolation and overnight post-fixation in 4% PFA at 4°C, the ventral portion of the  
1214 brain was removed and the remaining dorsal part (including the somatosensory cortex) was placed  
1215 in *ScaleSQ(5)* solution for 1 d at 37°C followed by incubation in *ScaleS4(0)* for another day at  
1216 37°C. *ScaleSQ(5)* was composed of 22.5% D-(-)-sorbitol (w/v), 9.1 M Urea, 5% Triton X-100 (w/v),  
1217 pH 8.2 and *ScaleS4(0)* of 40% D-(-)-sorbitol (w/v), 10% Glycerol (w/v), 4 M Urea, 15-25% DMSO  
1218 (v/v), pH 8.1. The next day, cleared cortices were placed in an imaging chamber filled with  
1219 *ScaleS4(0)*.

1220

1221 3D Reconstructions and analysis. For analysis of ER-GFP-expressing astrocytes and vascular  
1222 networks in 3D, 2PLSM (TCS SP8 MP-OPO, Leica Microsystems, 25x water immersion Objective,  
1223 resolution of 1024x1024 pixels, zoom factor of 2, frame average of 2 and 1  $\mu\text{m}$  inter-stack interval)  
1224 was utilized to acquire the desired volumes in cleared cortices and the resulting z-stacks were  
1225 imported into the Imaris software (version 8.3.1, Bitplane) to obtain a rendered 3D volume utilizing  
1226 the acquisition parameters. A surface mask was generated from the resulting volumes of the  
1227 desired fluorescent signal. To analyse the fractional ER-GFP signal density, the created mask was  
1228 then utilized to carefully segment the different cellular compartments, including the soma, end-feet  
1229 (corresponding to the portion of ER-GFP signal surrounding dextran-labelled vessels) and by  
1230 exclusion the branches. ER-GFP integrated signal density was then calculated for each of these  
1231 sub-volumes per cell and condition. For analysis of vasculature density in cleared control and  
1232 injured cortices as shown in Figure 6, z-stacks were acquired at a resolution of 1024x1024 pixels  
1233 (whole fields of view, 590 x 590  $\mu\text{m}$  scanning from surface of the cortex to the beginning of white

1234 matter) with a zoom factor 0.75 and 2  $\mu\text{m}$  inter-stack interval. Magnifications were acquired with a  
1235 zoom factor of 2, a frame average of 2 and a 1  $\mu\text{m}$  inter-stack interval. Large volume acquisitions  
1236 imported into Imaris were first cropped in xy on both sides of the lesion track in order to obtain a  
1237 narrower area of 590 x 350  $\mu\text{m}$  (175  $\mu\text{m}$  on each side of the lesion along the whole track utilizing  
1238 the dextran signal as reference), and then cropped in z to 600  $\mu\text{m}$  to obtain a final cortical block of  
1239 590 x 350 x 600  $\mu\text{m}$ . A surface mask was then generated from the dextran fluorescent signal and  
1240 utilized to trace the vascular network via a filament tracing algorithm embedded in Imaris.  
1241 Following filament tracing, volumes were thoroughly inspected for potential artifacts and eventually  
1242 corrected (see Figure S6A) before extracting vascular fractional volume, total length and branching  
1243 points. For quantifications of vascular network complexity following expression of AAVs as shown  
1244 in in Figure 7H and S7I, the AngioTool ImageJ plugin (Zudaire et al., 2011) was used.

1245

1246 *Immunostainings.* Following overnight post-fixation of isolated brains with PFA 4% in PBS, coronal  
1247 brain sections (40 to 70  $\mu\text{m}$  thick) were prepared using a vibratome (Leica, VT1000 S) and  
1248 permeabilized in 1% Triton X-100 in PBS for 10 min at RT, followed by brief incubation in 5% BSA  
1249 and 0.3% Triton X-100 in PBS before overnight immunodetection with primary antibodies diluted in  
1250 blocking buffer at 4°C on an orbital shaker. The next day, sections were rinsed in PBS 3x 10 min  
1251 and incubated for 2h at RT with the respective fluorophore-conjugated secondary antibodies  
1252 diluted in 3% BSA. After washing and nuclear counterstaining with 4',6-diamidino-2-phenylindole  
1253 (DAPI, ThermoFisher, 3  $\mu\text{M}$ ), sections were mounted on microscopic slides using Aqua Poly/Mount  
1254 (Polysciences). The following primary antibodies were used: chicken anti-GFP (1:500, Aves Labs,  
1255 GFP-1020), rabbit anti-RFP (1:500, Rockland, #600401379), rabbit anti-GFAP (1:500, Millipore,  
1256 ab5804), mouse anti-GFAP (1:500, Millipore, MAB360), rat anti-CD45 (1:500, BD, #550539), rat  
1257 anti-CD31 (1:50, BD, #550274), rabbit anti-S100 $\beta$  (1:500, Millipore, ab52642). The following  
1258 secondary antibodies were used (raised in donkey): Alexa Fluor 488-, Alexa Fluor 546-, Alexa  
1259 Fluor 647- conjugated secondary antibodies to rabbit, mouse, chicken and rat (1:1000, Jackson  
1260 ImmunoResearch). Images were acquired utilizing a SP8 Confocal microscope (Leica) equipped

1261 with a 20x (NA 0.75), 40x (NA 1.3), 63x (NA 1.4) or 100x (NA 1.3) oil immersion objective and  
1262 further processed with Fiji.

1263

1264 Isolation and enrichment of astrocytes via magnetic cell sorting (MACS). For astrocyte enrichment  
1265 the kit “Isolation and cultivation of astrocytes from adult mouse brain” (Miltenyi Biotec) was used  
1266 according to the manual instructions. In brief, cortical brain tissue was extracted and dissociated  
1267 enzymatically as well as mechanically. Myelin and cell debris were eliminated and in a subsequent  
1268 step erythrocytes were removed. Using the anti-ACSA-2 microbeads with the autoMACS Pro  
1269 Separator, astrocytes were magnetically separated from the suspension. Enriched astrocytes were  
1270 further processed by mass spectrometry.

1271

1272 Isolation and enrichment of astrocytes via fluorescence-activated cell sorting (FACS). The cortical  
1273 region exposed to SW-injury (typically 1 mm wide, 2 mm long and spanning the cortex depth but  
1274 excluding the white matter) was microdissected and dissociated using the “Adult Brain  
1275 Dissociation” kit from Miltenyi Biotec following the manufacturer’s instructions. Following astrocyte  
1276 staining with ACSA-2-APC (Clone IH3-18A3, 1:200, Miltenyi Biotec), Hoechst to discriminate  
1277 between cells and debris (10 µg/ml, Cell Signaling) and 7AAD for viability (2.5 µg, Affymetrix),  
1278 20.000 events of control samples were recorded to set appropriate gates and compensations. Cell  
1279 sorting was performed with a BD FACSAria Fusion equipped with a 100 µm nozzle (20 psi) and  
1280 five lasers (UV 355 nm, violet 405 nm, blue 488 nm, yellow 561 nm and red 640 nm). Sorted cells  
1281 were collected in PBS and processed for mass spectrometry analysis.

1282

1283 Transmission electron microscopy and image analysis. Anesthetized mice were transcardially  
1284 perfused with a fixative solution containing 4% formaldehyde and 2.5% glutaraldehyde in 0.1 M  
1285 cacodylate buffer. The brain was isolated, cut in 1 mm thick sagittal sections and small portions of  
1286 upper layers of the cortex were dissected for further processing (for injured cortices, the examined  
1287 area was dissected according to the location of the lesion track). For EPON embedding, the fixed  
1288 tissue was washed with 0.1 M sodium cacodylate buffer, incubated with 2% OsO<sub>4</sub> in 0.1 M  
1289 cacodylate buffer (Osmium, Science Services; Caco Applichem) for 2 h at 4°C and washed again

1290 three times with 0.1 M cacodylate buffer. Subsequently, tissue was dehydrated using an ascending  
1291 ethanol series with 15 min incubation at 4°C in each EtOH solution. Tissues were transferred to  
1292 propylene oxide and incubated in EPON (Sigma-Aldrich) overnight at 4°C. Tissues were placed in  
1293 fresh EPON at RT for 2 h, followed by embedding for 72 h at 62°C. Ultrathin sections of 70 nm  
1294 were cut using an ultramicrotome (Leica Microsystems, UC6) with a diamond knife (Diatome, Biel,  
1295 Switzerland) and stained with 1.5% uranyl acetate at 37°C for 15 min and lead citrate solution for  
1296 4 min. For immunogold staining (Tokuyasu technique), fixed tissue (4% PFA and 0.2% GA) was  
1297 infiltrated with 2.3 M sucrose in 0.1 M phosphate buffer overnight at 4°C, mounted on aluminium  
1298 pins for cryo-ultramicrotomy and snap-frozen in liquid nitrogen. Ultrathin cryo-sections of 70 nm  
1299 were cut with a diamond knife (Diatome, Biel, Switzerland) using a Leica UC6 with FC7 at -90°C.  
1300 Sections were picked up in a 1:1 mixture of 2% methylcellulose (Sigma-Aldrich) and 2.3 M  
1301 sucrose. After rinsing 3x in PBS and incubation in 0.05 M glycine (Sigma-Aldrich), sections were  
1302 blocked (2x3 min) with 1% BSA in PBS. For immuno-labelling, sections were incubated with  
1303 antiserum specific for RFP (Rockland) in blocking buffer, followed by rinsing of 6x in PBS and  
1304 90 min incubation with protein A-gold (12 nm, CMC-Utrecht) in blocking buffer. After fixation with  
1305 2% glutaraldehyde (3 min), sections were washed in PBS and H<sub>2</sub>O and contrasted (5 min) with  
1306 uranyl acetate (0.4% in 2% methylcellulose) on ice. Sections were picked up with a wire loop.  
1307 Excess fluid was drained from the loop by gentle tapping to Whatman filter paper, and sections  
1308 were embedded in the remaining thin film by air-drying. Electron micrographs were taken with a  
1309 JEM-2100 Plus Transmission Electron Microscope (JEOL), equipped with Camera OneView 4 K  
1310 16 bit (Gatan) and software DigitalMicrograph (Gatan). For analysis, electron micrographs were  
1311 acquired with a digital zoom of 5000x or 6000x. The area, perimeter and circularity of each  
1312 mitochondrion was determined in ImageJ follow manual drawing of single organelles. Mitochondrial  
1313 density was assessed by quantifying the absolute number of mitochondria per measured astrocytic  
1314 area or length of basal lamina. A similar approach was utilized to quantify the extent of  
1315 mitochondria-ER contact sites (defined as sites of contact within a reciprocal distance of 50 nm)  
1316 and minimal mitochondria-ER proximity. All parameters obtained from one field of view (usually  
1317 containing several mitochondria and multiple contact sites) were averaged together.

1318  
1319 Mass spectrometry (MS) and data analysis. For proteomic analysis, MACS-enriched or FACS  
1320 isolated astrocytes were lysed in SP3 lysis buffer (4% SDS in PBS) and chromatin was degraded  
1321 using a Bioruptor (10 min, cycle 30/30 s). Samples were reduced with 5 mM Dithiothreitol (DTT) at  
1322 55°C for 30 min, alkylated with 40 mM Chloroacetamide (CAA) at RT for 30 min and protein  
1323 amount was quantified using the Direct Detect Spectrometer from Merck. Protein digestion was  
1324 performed using the Single-Pot Solid-Phase-enhanced Sample Preparation approach SP3. In brief,  
1325 2  $\mu$ L of a 10 mg/mL mixture of hydrophilic and hydrophobic carboxylate coated paramagnetic  
1326 beads (SeraMag Speed Beads, #44152105050250 and #24152105050250, GE Healthcare) were  
1327 added to each sample. Acetonitrile was added to a final concentration of 50%. Bound proteins  
1328 were washed with 70% ethanol and 100% acetonitrile. Beads were re-suspended in 5  $\mu$ L 50 mM  
1329 Triethylammoniumbicarbonate buffer containing 0.1  $\mu$ g Trypsin (Sigma) and 0.1  $\mu$ g LysC (Wako).  
1330 Digestion was carried out at 37°C for 16 h in a PCR cycler. Recovered peptides were re-  
1331 suspended in 1% formic acid / 5% DMSO and stored at -20°C prior MS analysis. All samples were  
1332 analyzed on a Q-Exactive Plus (Thermo Scientific) mass spectrometer that was coupled to an  
1333 EASY nLC 1000 UPLC (Thermo Scientific). Peptides were loaded with solvent A (0.1% formic acid  
1334 in water) onto an in-house packed analytical column (50 cm  $\times$  75  $\mu$ m I.D., filled with 2.7  $\mu$ m  
1335 Poroshell EC120 C18, Agilent). Peptides were chromatographically separated at a constant flow  
1336 rate of 250 nL/min using the following gradient: 5-30% solvent B (0.1% formic acid in 80%  
1337 acetonitrile) within 65 min, 30-50% solvent B within 13 min, followed by washing and column  
1338 equilibration. The mass spectrometer was operated in data-dependent acquisition mode. The MS1  
1339 survey scan was acquired from 300-1750 m/z at a resolution of 70,000. The top 10 most abundant  
1340 peptides were isolated within a 2 Da window and subjected to HCD fragmentation at a normalized  
1341 collision energy of 27%. The AGC target was set to 5e5 charges, allowing a maximum injection  
1342 time of 110 ms. Product ions were detected in the Orbitrap at a resolution of 17,500. Precursors  
1343 were dynamically excluded for 20 s. All mass spectrometric raw data were processed with  
1344 Maxquant (version 1.5.3.8) using default parameters. Briefly, MS2 spectra were searched against  
1345 the Uniprot MOUSE.fasta database, including a list of common contaminants. False discovery  
1346 rates on protein and PSM level were estimated by the target-decoy approach to 0.01% (Protein



1347 FDR) and 0.01% (PSM FDR), respectively. The minimal peptide length was set to 7 amino acids  
1348 and carbamidomethylation at cysteine residues was considered as a fixed modification. Oxidation  
1349 (M) and Acetyl (Protein N-term) were included as variable modifications. The match-between runs  
1350 option was enabled. LFQ quantification was enabled using default settings. The Maxquant output  
1351 was processed as follows: Protein groups flagged as „reverse“, „potential contaminant“ or „only  
1352 identified by site“ were removed from the proteinGroups.txt. LFQ values were log2 transformed.  
1353 Proteins with less than 2 valid values were removed. Missing values were replaced by imputation  
1354 from a normal distribution (width 0.3, down shift 1.8). A two sample t-test was used to determine  
1355 significantly changing protein levels ( $S_0 = 0.1$ ), and a permutation-based FDR was calculated to  
1356 correct for multiple testing. The obtained data was uploaded into the Ingenuity Pathway Analysis  
1357 (IPA) software (Qiagen) utilizing a Benjamini adjusted  $p$ -value of 0.05 or lower to investigate  
1358 canonical pathways that were significantly changed. Heat map visualization of relative protein  
1359 abundance was obtained calculating a z-score of the LFQ values for each protein.

1360

1361 *<sup>13</sup>C-glucose feeding in mice and sample preparation*

1362 Mice were fasted overnight before being anesthetized and receiving a single tail vein injection of  
1363 150  $\mu$ mol of <sup>13</sup>C<sub>6</sub>-glucose (in saline) over the course of 30 seconds. After 30 min, mice were quickly  
1364 sacrificed and the peri-lesioned cortical area extracted in PBS for astrocyte enrichment via MACS  
1365 as described above. The resulting astrocytic fraction was homogenized in  
1366 acetonitrile:methanol:water (40:40:20) for metabolite extraction.

1367

1368 *LC-MS analysis of isotope-enrichments in amino acids after <sup>13</sup>C-glucose feeding*

1369 For amino acid analysis the benzoylchlorid derivatization method (Wong et al., 2016) was used. In  
1370 brief: One of the two dried metabolite pellets of each sample was re-suspended in 20  $\mu$ l of the LC-  
1371 MS-grade waters (Milli-Q 7000 equipped with an LC-Pak and a Millipak filter, Millipore). The re-  
1372 suspended sample was mixed with 10  $\mu$ l of 100 mM sodium carbonate (Sigma) followed by the  
1373 addition of 10  $\mu$ l 2% benzoylchloride (Sigma) in acetonitrile (Optima-Grade, Fisher-Scientific).  
1374 Samples were vortexed before centrifuging them for 10 min 21.300x g at 20°C. Clear supernatants  
1375 were transferred to fresh auto sampler tubes with conical glass inserts (Chromatographie

1376 Zubehoer Trott) and analyzed using an Acquity iClass UPLC (Waters) connected to a Q-Exactive  
1377 HF (Thermo). For the analysis, 2  $\mu$ l of the derivatized sample were injected onto a 100 x 1.0 mm  
1378 HSS T3 UPLC column (Waters). The flow rate was set to 100  $\mu$ L/min using a buffer system  
1379 consisted of buffer A (10 mM ammonium formate (Sigma), 0.15% formic acid (Sigma) in Milli-Q  
1380 water (Millipore)) and buffer B (acetonitrile, Optima-grade, Fisher-Scientific). The LC gradient was:  
1381 0% B at 0 min; 0-15% B 0-0.1 min; 15-17% B 0.1-0.5 min; 17-55% B 0.5-14 min, 55-70% B 14-  
1382 14.5 min; 70-100% B 14.5-18 min; 100% B 18-19 min; 100-0% B 19-19.1 min, 19.1-28 min 0% B.  
1383 The mass spectrometer was operating in positive ionization mode monitoring the mass range m/z  
1384 50-750. The heated ESI source settings of the mass spectrometer were: Spray voltage 3.5kV,  
1385 capillary temperature 250°C, sheath gas flow 60 AU and aux gas flow 20 AU at a temperature of  
1386 250°C. The S-lens was set to a value of 60 AU. Data analysis of isotope ratios was performed  
1387 using the TraceFinder software (Version 4.2, Thermo Fisher Scientific). Identity of each compound  
1388 was validated by authentic reference compounds, which were analysed independently. For the  
1389 isotope enrichment analysis the area of the extracted ion chromatogram (XIC) of each isotope [M +  
1390 H]<sup>+</sup> were determined with a mass accuracy (<5 ppm) before calculating the proportions of each  
1391 detected isotope towards the sum of all isotopes of the corresponding compound. These  
1392 proportions are given as percent values for each isotope. Results are indicated as Molar Percent  
1393 Enrichment (M.P.E.), which value is obtained by using the formula:

1394 
$$\sum_{i=1}^n \left( \frac{M_i \cdot f_i}{n} \right)$$

1395

1396 where n=number of carbon atoms in the metabolite, and  $M_i$  =relative abundance of the i-th mass  
1397 isotopomer.

1398

#### 1399 GC-MS analysis of isotope-enrichments in metabolites from TCA cycle after <sup>13</sup>C-glucose feeding

1400 Similar to the analysis of the isotope enrichment analysis in the amino acids, isotope enrichment  
1401 analysis in TCA cycle metabolites were determined using GC-MS (Q-Exactive GC-Orbitrap,  
1402 Thermo Fisher Scientific). For this purpose metabolites were derivatized using a two-step  
1403 procedure starting with an methoxyamination (methoxyamine hydrochlorid, Sigma) followed by a

1404 trimethyl-silylation using N-Methyl-N-trimethylsilyl-trifluoroacetamide (MSTFA, Macherey-Nagel).  
1405 Dried samples were re-suspended in 5  $\mu$ L of a freshly prepared (20 mg/mL) solution of  
1406 methoxyamine in pyridine (Sigma) to perform the methoxyamination. These samples were then  
1407 incubated for 90 min at 40°C on an orbital shaker (VWR) at 1500 rpm. In the second step  
1408 additional 45  $\mu$ L of MSTFA were added and the samples were incubated for additional 30 min at  
1409 40°C and 1500 rpm. At the end of the derivatisation the samples were centrifuged for 10 min at  
1410 21100x g and 40  $\mu$ L of the clear supernatant was transferred to fresh auto sampler vials with  
1411 conical glass inserts (Chromatographie Zubehoer Trott). For the GC-MS analysis 1  $\mu$ L of each  
1412 sample was injected using a PAL autosampler system (Thermo Fisher Scientific) using a  
1413 Split/Splitless (SSL) injector at 300 °C in splitless mode. The carrier gas flow (helium) was set to 2  
1414 ml/min using a 30m DB-35MS capillary column (0.250 mm diameter and 0.25  $\mu$ m film thickness,  
1415 Agilent). The GC temperature program was: 2 min at 85°C, followed by a 15°C per min ramp to  
1416 330°C. At the end of the gradient the temperature is held for additional 6 min at 330°C. The  
1417 transfer line and source temperature are both set to 280°C. The filament, which was operating at  
1418 70 V, was switched on 2 min after the sample was injected. During the whole gradient period the  
1419 MS was operated in full scan mode covering a m/z range between 70 and 800 with a scan speed  
1420 of 20 Hertz. For data analysis peak areas of extracted ion chromatograms of each isotope of  
1421 compound-specific fragments  $[M - e]^{+}$  were determined using the TraceFinder software (Version  
1422 4.2, Thermo Fisher Scientific) with a mass accuracy (<5 ppm). Subsequently proportions of each  
1423 detected isotope towards the sum of all isotopes of the corresponding compound-specific fragment  
1424 were determined. These proportions are given as percent values for each isotope. Details on the  
1425 compound-specific fragments of the analysed compounds: citric acid was analysed from a five  
1426 carbon-containing fragment (C<sub>11</sub>H<sub>21</sub>O<sub>4</sub>Si<sub>2</sub>) and a m/z of 273.09729; succinic acid was analysed  
1427 from a four carbon-containing fragment (C<sub>9</sub>H<sub>19</sub>O<sub>4</sub>Si<sub>2</sub>) and a m/z of 247.08164; fumaric acid was  
1428 analysed from a four carbon-containing fragment (C<sub>9</sub>H<sub>17</sub>O<sub>4</sub>Si<sub>2</sub>) and a m/z of 247.08164. The  
1429 retention time and therefore identity of each compound was validated by authentic reference  
1430 compounds which were analysed independently.

1431

1432 Analysis of mitochondrial morphology, 2D ER morphology and CD31 immunoreactivity. For  
1433 analysis of mitochondrial morphology in mitoYFP+ samples, serial z-stacks (0.3 to 0.5  $\mu\text{m}$  steps) of  
1434 individual astrocytes within the slice were acquired with an SP8 laser scanning confocal system  
1435 (Leica) utilizing a 100x objective (NA 1.3) and digital zoom of 1.5. Acquired z-stacks were  
1436 subjected to deconvolution (Huygens Professional software; Scientific Volume Imaging) utilizing  
1437 the acquisition parameters and the resulting surface rendering images were utilized to extract  
1438 mitochondrial morphological parameters (length, voxel volume and sphericity) via the object  
1439 analyser plugin (Huygens). The length and sphericity of all quantified mitochondria (typically in the  
1440 range of several hundreds) per astrocyte were plotted via the OriginPro software (OriginLab) and  
1441 the resulting diagrams utilized to quantify the percentage of fragmented vs tubular mitochondria  
1442 per astrocyte, utilizing as cut-off values 1 $\mu\text{m}$  for the length and 0.8 for sphericity (where 1 would  
1443 represent a sphere). At least 4-5 astrocytes (selected for their proximity to the lesion track) per  
1444 mouse were analysed and the percentage of all individual astrocytes from the same mouse were  
1445 pooled together. To estimate the perivascular density of mitochondria in astrocytic end-feet, a  
1446 circular ROI exceeding the dextran-red signal by 5  $\mu\text{m}$  (for cleared tissue) or 2  $\mu\text{m}$  (for brain  
1447 sections stained with CD31) was drawn around the labelled vessels in each analysed image. The  
1448 acquired channel containing the mitochondrial signal (mitoYFP or mRFP depending on the  
1449 experimental setup) was first thresholded and the resulting image utilized to calculate the ROI area  
1450 fraction covered by mitochondrial signal. To calculate the perivascular ER-GFP g-ratio, the thickest  
1451 sheet of ER-GFP signal in the end-feet in direct contact with the dextran-labelled vessel was  
1452 measured and normalized to the vessel radius itself. The formula ( $R_{\text{lumen}}/(R_{\text{lumen}} + R_{\text{ER-GFP}})$ ) was  
1453 utilized to obtain the g-ratio values per astrocyte. To analyse the vasculature in 2D in sections  
1454 labelled for CD31, a region of about 600x600  $\mu\text{m}$  in xy was cropped in the acquired z-stacks, its  
1455 brightness adjusted with the same parameters for all images, smoothed in 3D (sigma =1) and  
1456 signal noise removed via a despeckle filter. Following z-projection (standard deviation, STD) and  
1457 creation of a binary mask, the CD31 area fraction was measured for each image.

1458

1459 Statistics. Data are represented as means  $\pm$  SD. Graphical illustrations and significance were  
1460 obtained with GraphPad Prism 7 (GraphPad) or with OriginPro (OriginLab). The levels of  
1461 significance were set as \*  $p < 0.05$ ; \*\*  $p < 0.01$ ; \*\*\*  $p < 0.001$ .

1462

1463 Materials availability. Requests for materials, reagents and tools should be addressed to the lead  
1464 contact, Matteo Bergami ([matteo.bergami@uk-koeln.de](mailto:matteo.bergami@uk-koeln.de)).

1465

1466

1467

1468

1469

1470

1471

1472

1473

1474

1475

1476

1477

1478

1479

1480

1481

1482

1483

1484

1485

1486

## 1487 References

- 1488 Agarwal, A., Wu, P.H., Hughes, E.G., Fukaya, M., Tischfield, M.A., Langseth, A.J., Wirtz, D., and Bergles, D.E.  
1489 (2017). Transient Opening of the Mitochondrial Permeability Transition Pore Induces Microdomain Calcium Transients  
1490 in Astrocyte Processes. *Neuron* 93, 587-605 e587.
- 1491 Al-Mehdi, A.B., Pastukh, V.M., Swiger, B.M., Reed, D.J., Patel, M.R., Bardwell, G.C., Pastukh, V.V., Alexeyev, M.F.,  
1492 and Gillespie, M.N. (2012). Perinuclear mitochondrial clustering creates an oxidant-rich nuclear domain required for  
1493 hypoxia-induced transcription. *Sci Signal* 5, ra47.
- 1494 Anderson, M.A., Burda, J.E., Ren, Y., Ao, Y., O'Shea, T.M., Kawaguchi, R., Coppola, G., Khakh, B.S., Deming, T.J.,  
1495 and Sofroniew, M.V. (2016). Astrocyte scar formation aids central nervous system axon regeneration. *Nature* 532, 195-  
1496 200.
- 1497 Anton, F., Dittmar, G., Langer, T., and Escobar-Henriques, M. (2013). Two deubiquitylases act on mitofusin and  
1498 regulate mitochondrial fusion along independent pathways. *Molecular cell* 49, 487-498.
- 1499 Arruda, A.P., Pers, B.M., Parlakgul, G., Guney, E., Inouye, K., and Hotamisligil, G.S. (2014). Chronic enrichment of  
1500 hepatic endoplasmic reticulum-mitochondria contact leads to mitochondrial dysfunction in obesity. *Nat Med* 20, 1427-  
1501 1435.
- 1502 Baughman, J.M., Perocchi, F., Girgis, H.S., Plovanich, M., Belcher-Timme, C.A., Sancak, Y., Bao, X.R., Strittmatter,  
1503 L., Goldberger, O., Bogorad, R.L., *et al.* (2011). Integrative genomics identifies MCU as an essential component of the  
1504 mitochondrial calcium uniporter. *Nature* 476, 341-345.
- 1505 Belanger, M., Allaman, I., and Magistretti, P.J. (2011). Brain energy metabolism: focus on astrocyte-neuron metabolic  
1506 cooperation. *Cell Metab* 14, 724-738.
- 1507 Bindocci, E., Savtchouk, I., Liaudet, N., Becker, D., Carriero, G., and Volterra, A. (2017). Three-dimensional Ca<sup>2+</sup>  
1508 imaging advances understanding of astrocyte biology. *Science* 356.
- 1509 Birdsey, G.M., Dryden, N.H., Amsellem, V., Gebhardt, F., Sahnun, K., Haskard, D.O., Dejana, E., Mason, J.C., and  
1510 Randi, A.M. (2008). Transcription factor Erg regulates angiogenesis and endothelial apoptosis through VE-cadherin.  
1511 *Blood* 111, 3498-3506.
- 1512 Booth, D.M., Enyedi, B., Geiszt, M., Varnai, P., and Hajnoczky, G. (2016). Redox Nanodomains Are Induced by and  
1513 Control Calcium Signaling at the ER-Mitochondrial Interface. *Molecular cell* 63, 240-248.
- 1514 Boulay, A.C., Saubamea, B., Adam, N., Chasseigneaux, S., Mazare, N., Gilbert, A., Bahin, M., Bastianelli, L., Blugeon,  
1515 C., Perrin, S., *et al.* (2017). Translation in astrocyte distal processes sets molecular heterogeneity at the gliovascular  
1516 interface. *Cell discovery* 3, 17005.
- 1517 Castejon, O.J. (2015). Biopathology of astrocytes in human traumatic and complicated brain injuries. Review and  
1518 hypothesis. *Folia neuropathologica* 53, 173-192.
- 1519 Chao, C.C., Gutierrez-Vazquez, C., Rothhammer, V., Mayo, L., Wheeler, M.A., Tjon, E.C., Zandee, S.E.J., Blain, M.,  
1520 de Lima, K.A., Takenaka, M.C., *et al.* (2019). Metabolic Control of Astrocyte Pathogenic Activity via cPLA2-MAVS.  
1521 *Cell* 179, 1483-1498 e1422.
- 1522 Chen, H., Detmer, S.A., Ewald, A.J., Griffin, E.E., Fraser, S.E., and Chan, D.C. (2003). Mitofusins Mfn1 and Mfn2  
1523 coordinately regulate mitochondrial fusion and are essential for embryonic development. *J Cell Biol* 160, 189-200.
- 1524 Chen, H., McCaffery, J.M., and Chan, D.C. (2007). Mitochondrial fusion protects against neurodegeneration in the  
1525 cerebellum. *Cell* 130, 548-562.
- 1526 Chen, K.H., Guo, X., Ma, D., Guo, Y., Li, Q., Yang, D., Li, P., Qiu, X., Wen, S., Xiao, R.P., *et al.* (2004).  
1527 Dysregulation of HSG triggers vascular proliferative disorders. *Nat Cell Biol* 6, 872-883.
- 1528 Chen, Q., Kirk, K., Shurubor, Y.I., Zhao, D., Arreguin, A.J., Shahi, I., Valsecchi, F., Primiano, G., Calder, E.L., Carelli,  
1529 V., *et al.* (2018). Rewiring of Glutamine Metabolism Is a Bioenergetic Adaptation of Human Cells with Mitochondrial  
1530 DNA Mutations. *Cell Metab* 27, 1007-1025 e1005.
- 1531 Chow, L.M., Zhang, J., and Baker, S.J. (2008). Inducible Cre recombinase activity in mouse mature astrocytes and adult  
1532 neural precursor cells. *Transgenic research* 17, 919-928.
- 1533 Cipolat, S., Martins de Brito, O., Dal Zilio, B., and Scorrano, L. (2004). OPA1 requires mitofusin 1 to promote  
1534 mitochondrial fusion. *Proc Natl Acad Sci U S A* 101, 15927-15932.
- 1535 Csordas, G., Renken, C., Varnai, P., Walter, L., Weaver, D., Buttle, K.F., Balla, T., Mannella, C.A., and Hajnoczky, G.  
1536 (2006). Structural and functional features and significance of the physical linkage between ER and mitochondria. *J Cell*  
1537 *Biol* 174, 915-921.
- 1538 Csordas, G., Varnai, P., Golenar, T., Roy, S., Purkins, G., Schneider, T.G., Balla, T., and Hajnoczky, G. (2010).  
1539 Imaging interorganelle contacts and local calcium dynamics at the ER-mitochondrial interface. *Molecular cell* 39, 121-  
1540 132.
- 1541 Csordas, G., Weaver, D., and Hajnoczky, G. (2018). Endoplasmic Reticulum-Mitochondrial Contactology: Structure  
1542 and Signaling Functions. *Trends in cell biology* 28, 523-540.
- 1543 de Brito, O.M., and Scorrano, L. (2008). Mitofusin 2 tethers endoplasmic reticulum to mitochondria. *Nature* 456, 605-  
1544 610.
- 1545 De Stefani, D., Raffaello, A., Teardo, E., Szabo, I., and Rizzuto, R. (2011). A forty-kilodalton protein of the inner  
1546 membrane is the mitochondrial calcium uniporter. *Nature* 476, 336-340.

- 1547 Dietrich, M.O., Liu, Z.W., and Horvath, T.L. (2013). Mitochondrial dynamics controlled by mitofusins regulate Agrp  
1548 neuronal activity and diet-induced obesity. *Cell* 155, 188-199.
- 1549 Filadi, R., Greotti, E., Turacchio, G., Luini, A., Pozzan, T., and Pizzo, P. (2015). Mitofusin 2 ablation increases  
1550 endoplasmic reticulum-mitochondria coupling. *Proc Natl Acad Sci U S A* 112, E2174-2181.
- 1551 Finke, S., Mueller-Waldeck, R., and Conzelmann, K.K. (2003). Rabies virus matrix protein regulates the balance of  
1552 virus transcription and replication. *The Journal of general virology* 84, 1613-1621.
- 1553 Ghanem, A., Kern, A., and Conzelmann, K.K. (2012). Significantly improved rescue of rabies virus from cDNA  
1554 plasmids. *European journal of cell biology* 91, 10-16.
- 1555 Giorgi, C., Marchi, S., and Pinton, P. (2018). The machineries, regulation and cellular functions of mitochondrial  
1556 calcium. *Nat Rev Mol Cell Biol* 19, 713-730.
- 1557 Gobel, J., Motori, E., and Bergami, M. (2018). Spatiotemporal control of mitochondrial network dynamics in astroglial  
1558 cells. *Biochemical and biophysical research communications* 500, 17-25.
- 1559 Gomes, L.C., Di Benedetto, G., and Scorrano, L. (2011). During autophagy mitochondria elongate, are spared from  
1560 degradation and sustain cell viability. *Nat Cell Biol* 13, 589-598.
- 1561 Hama, H., Kurokawa, H., Kawano, H., Ando, R., Shimogori, T., Noda, H., Fukami, K., Sakaue-Sawano, A., and  
1562 Miyawaki, A. (2011). Scale: a chemical approach for fluorescence imaging and reconstruction of transparent mouse  
1563 brain. *Nat Neurosci* 14, 1481-1488.
- 1564 Hamby, M.E., Coppola, G., Ao, Y., Geschwind, D.H., Khakh, B.S., and Sofroniew, M.V. (2012). Inflammatory  
1565 mediators alter the astrocyte transcriptome and calcium signaling elicited by multiple g-protein-coupled receptors. *J*  
1566 *Neurosci* 32, 14489-14510.
- 1567 Han, S.M., Baig, H.S., and Hammarlund, M. (2016). Mitochondria Localize to Injured Axons to Support Regeneration.  
1568 *Neuron* 92, 1308-1323.
- 1569 Hayashi, T., Rizzuto, R., Hajnoczky, G., and Su, T.P. (2009). MAM: more than just a housekeeper. *Trends in cell*  
1570 *biology* 19, 81-88.
- 1571 Hertz, L., Peng, L., and Dienel, G.A. (2007). Energy metabolism in astrocytes: high rate of oxidative metabolism and  
1572 spatiotemporal dependence on glycolysis/glycogenolysis. *J Cereb Blood Flow Metab* 27, 219-249.
- 1573 Holland, E.C., and Varmus, H.E. (1998). Basic fibroblast growth factor induces cell migration and proliferation after  
1574 glia-specific gene transfer in mice. *Proc Natl Acad Sci U S A* 95, 1218-1223.
- 1575 Horng, S., Therattil, A., Moyon, S., Gordon, A., Kim, K., Argaw, A.T., Hara, Y., Mariani, J.N., Sawai, S., Flodby, P., *et*  
1576 *al.* (2017). Astrocytic tight junctions control inflammatory CNS lesion pathogenesis. *The Journal of clinical*  
1577 *investigation* 127, 3136-3151.
- 1578 Iadecola, C. (2017). The Neurovascular Unit Coming of Age: A Journey through Neurovascular Coupling in Health and  
1579 Disease. *Neuron* 96, 17-42.
- 1580 Ignatenko, O., Chilov, D., Paetau, I., de Miguel, E., Jackson, C.B., Capin, G., Paetau, A., Terzioglu, M., Euro, L., and  
1581 Suomalainen, A. (2018). Loss of mtDNA activates astrocytes and leads to spongiotic encephalopathy. *Nature*  
1582 *communications* 9, 70.
- 1583 Iliff, J.J., Wang, M., Liao, Y., Plogg, B.A., Peng, W., Gundersen, G.A., Benveniste, H., Vates, G.E., Deane, R.,  
1584 Goldman, S.A., *et al.* (2012). A paravascular pathway facilitates CSF flow through the brain parenchyma and the  
1585 clearance of interstitial solutes, including amyloid beta. *Science translational medicine* 4, 147ra111.
- 1586 Ishihara, N., Nomura, M., Jofuku, A., Kato, H., Suzuki, S.O., Masuda, K., Otera, H., Nakanishi, Y., Nonaka, I., Goto,  
1587 Y., *et al.* (2009). Mitochondrial fission factor Drp1 is essential for embryonic development and synapse formation in  
1588 mice. *Nat Cell Biol* 11, 958-966.
- 1589 Jackson, J.G., and Robinson, M.B. (2015). Reciprocal Regulation of Mitochondrial Dynamics and Calcium Signaling in  
1590 Astrocyte Processes. *J Neurosci* 35, 15199-15213.
- 1591 Jackson, J.G., and Robinson, M.B. (2018). Regulation of mitochondrial dynamics in astrocytes: Mechanisms,  
1592 consequences, and unknowns. *Glia* 66, 1213-1234.
- 1593 Khakh, B.S., and Sofroniew, M.V. (2015). Diversity of astrocyte functions and phenotypes in neural circuits. *Nat*  
1594 *Neurosci* 18, 942-952.
- 1595 Kulkarni, S.S., Joffraud, M., Boutant, M., Ratajczak, J., Gao, A.W., Maclachlan, C., Hernandez-Alvarez, M.I.,  
1596 Raymond, F., Metairon, S., Descombes, P., *et al.* (2016). Mfn1 Deficiency in the Liver Protects Against Diet-Induced  
1597 Insulin Resistance and Enhances the Hypoglycemic Effect of Metformin. *Diabetes* 65, 3552-3560.
- 1598 Labbe, K., Murley, A., and Nunnari, J. (2014). Determinants and functions of mitochondrial behavior. *Annual review of*  
1599 *cell and developmental biology* 30, 357-391.
- 1600 Lee, S., Sterky, F.H., Mourier, A., Terzioglu, M., Cullheim, S., Olson, L., and Larsson, N.G. (2012). Mitofusin 2 is  
1601 necessary for striatal axonal projections of midbrain dopamine neurons. *Human molecular genetics* 21, 4827-4835.
- 1602 Li, H., Wang, X., Zhang, N., Gottipati, M.K., Parpura, V., and Ding, S. (2014). Imaging of mitochondrial Ca<sup>2+</sup>  
1603 dynamics in astrocytes using cell-specific mitochondria-targeted GCaMP5G/6s: mitochondrial Ca<sup>2+</sup> uptake and  
1604 cytosolic Ca<sup>2+</sup> availability via the endoplasmic reticulum store. *Cell calcium* 56, 457-466.
- 1605 Liddelow, S.A., and Barres, B.A. (2017). Reactive Astrocytes: Production, Function, and Therapeutic Potential.  
1606 *Immunity* 46, 957-967.

- 1607 Liddelow, S.A., Guttenplan, K.A., Clarke, L.E., Bennett, F.C., Bohlen, C.J., Schirmer, L., Bennett, M.L., Munch, A.E.,  
1608 Chung, W.S., Peterson, T.C., *et al.* (2017). Neurotoxic reactive astrocytes are induced by activated microglia. *Nature*  
1609 *541*, 481-487.
- 1610 Lopez-Fabuel, I., Le Douce, J., Logan, A., James, A.M., Bonvento, G., Murphy, M.P., Almeida, A., and Bolanos, J.P.  
1611 (2016). Complex I assembly into supercomplexes determines differential mitochondrial ROS production in neurons and  
1612 astrocytes. *Proc Natl Acad Sci U S A* *113*, 13063-13068.
- 1613 Lovatt, D., Sonnewald, U., Waagepetersen, H.S., Schousboe, A., He, W., Lin, J.H., Han, X., Takano, T., Wang, S., Sim,  
1614 F.J., *et al.* (2007). The transcriptome and metabolic gene signature of protoplasmic astrocytes in the adult murine  
1615 cortex. *J Neurosci* *27*, 12255-12266.
- 1616 Luchsinger, L.L., de Almeida, M.J., Corrigan, D.J., Mumau, M., and Snoeck, H.W. (2016). Mitofusin 2 maintains  
1617 haematopoietic stem cells with extensive lymphoid potential. *Nature* *529*, 528-531.
- 1618 Madisen, L., Zwingman, T.A., Sunkin, S.M., Oh, S.W., Zariwala, H.A., Gu, H., Ng, L.L., Palmiter, R.D., Hawrylycz,  
1619 M.J., Jones, A.R., *et al.* (2010). A robust and high-throughput Cre reporting and characterization system for the whole  
1620 mouse brain. *Nat Neurosci* *13*, 133-140.
- 1621 Mar, F.M., Simoes, A.R., Leite, S., Morgado, M.M., Santos, T.E., Rodrigo, I.S., Teixeira, C.A., Misgeld, T., and Sousa,  
1622 M.M. (2014). CNS axons globally increase axonal transport after peripheral conditioning. *J Neurosci* *34*, 5965-5970.
- 1623 Mathiisen, T.M., Lehre, K.P., Danbolt, N.C., and Ottersen, O.P. (2010). The perivascular astroglial sheath provides a  
1624 complete covering of the brain microvessels: an electron microscopic 3D reconstruction. *Glia* *58*, 1094-1103.
- 1625 Misgeld, T., Kerschensteiner, M., Bareyre, F.M., Burgess, R.W., and Lichtman, J.W. (2007). Imaging axonal transport  
1626 of mitochondria in vivo. *Nat Methods* *4*, 559-561.
- 1627 Mori, T., Tanaka, K., Buffo, A., Wurst, W., Kuhn, R., and Gotz, M. (2006). Inducible gene deletion in astroglia and  
1628 radial glia—a valuable tool for functional and lineage analysis. *Glia* *54*, 21-34.
- 1629 Moss, J., Gebara, E., Bushong, E.A., Sanchez-Pascual, I., O'Laio, R., El M'Ghari, I., Kocher-Braissant, J., Ellisman,  
1630 M.H., and Toni, N. (2016). Fine processes of Nestin-GFP-positive radial glia-like stem cells in the adult dentate gyrus  
1631 ensheath local synapses and vasculature. *Proc Natl Acad Sci U S A* *113*, E2536-2545.
- 1632 Motori, E., Puyal, J., Toni, N., Ghanem, A., Angeloni, C., Malaguti, M., Cantelli-Forti, G., Berninger, B., Conzelmann,  
1633 K.K., Gotz, M., *et al.* (2013). Inflammation-induced alteration of astrocyte mitochondrial dynamics requires autophagy  
1634 for mitochondrial network maintenance. *Cell Metab* *18*, 844-859.
- 1635 Naon, D., Zaninello, M., Giacomello, M., Varanita, T., Grespi, F., Lakshminarayanan, S., Serafini, A., Semenzato, M.,  
1636 Herkenne, S., Hernandez-Alvarez, M.I., *et al.* (2016). Critical reappraisal confirms that Mitofusin 2 is an endoplasmic  
1637 reticulum-mitochondria tether. *Proc Natl Acad Sci U S A* *113*, 11249-11254.
- 1638 O'Donnell, J.C., Jackson, J.G., and Robinson, M.B. (2016). Transient Oxygen/Glucose Deprivation Causes a Delayed  
1639 Loss of Mitochondria and Increases Spontaneous Calcium Signaling in Astrocytic Processes. *J Neurosci* *36*, 7109-7127.
- 1640 Owens, K., Park, J.H., Gourley, S., Jones, H., and Kristian, T. (2015). Mitochondrial dynamics: cell-type and  
1641 hippocampal region specific changes following global cerebral ischemia. *Journal of bioenergetics and biomembranes*  
1642 *47*, 13-31.
- 1643 Parnis, J., Montana, V., Delgado-Martinez, I., Matyash, V., Parpura, V., Kettenmann, H., Sekler, I., and Nolte, C.  
1644 (2013). Mitochondrial exchanger NCLX plays a major role in the intracellular Ca<sup>2+</sup> signaling, gliotransmission, and  
1645 proliferation of astrocytes. *J Neurosci* *33*, 7206-7219.
- 1646 Parpura, V., Grubisic, V., and Verkhratsky, A. (2011). Ca<sup>2+</sup> sources for the exocytotic release of glutamate from  
1647 astrocytes. *Biochim Biophys Acta* *1813*, 984-991.
- 1648 Polyzos, A.A., Lee, D.Y., Datta, R., Hauser, M., Budworth, H., Holt, A., Mihalik, S., Goldschmidt, P., Frankel, K.,  
1649 Trego, K., *et al.* (2019). Metabolic Reprogramming in Astrocytes Distinguishes Region-Specific Neuronal  
1650 Susceptibility in Huntington Mice. *Cell Metab*.
- 1651 Prakash, R., and Carmichael, S.T. (2015). Blood-brain barrier breakdown and neovascularization processes after stroke  
1652 and traumatic brain injury. *Current opinion in neurology* *28*, 556-564.
- 1653 Rambold, A.S., Kostecky, B., Elia, N., and Lippincott-Schwartz, J. (2011). Tubular network formation protects  
1654 mitochondria from autophagosomal degradation during nutrient starvation. *Proc Natl Acad Sci U S A* *108*, 10190-  
1655 10195.
- 1656 Rangaraju, V., Lauterbach, M., and Schuman, E.M. (2019). Spatially Stable Mitochondrial Compartments Fuel Local  
1657 Translation during Plasticity. *Cell* *176*, 73-84 e15.
- 1658 Reyes, R.C., and Parpura, V. (2008). Mitochondria modulate Ca<sup>2+</sup>-dependent glutamate release from rat cortical  
1659 astrocytes. *J Neurosci* *28*, 9682-9691.
- 1660 Rizzuto, R., De Stefani, D., Raffaello, A., and Mammucari, C. (2012). Mitochondria as sensors and regulators of  
1661 calcium signalling. *Nat Rev Mol Cell Biol* *13*, 566-578.
- 1662 Salehi, A., Zhang, J.H., and Obenaus, A. (2017). Response of the cerebral vasculature following traumatic brain injury.  
1663 *J Cereb Blood Flow Metab* *37*, 2320-2339.
- 1664 Schneeberger, M., Dietrich, M.O., Sebastian, D., Imbernon, M., Castano, C., Garcia, A., Esteban, Y., Gonzalez-  
1665 Franquesa, A., Rodriguez, I.C., Bortolozzi, A., *et al.* (2013). Mitofusin 2 in POMC neurons connects ER stress with  
1666 leptin resistance and energy imbalance. *Cell* *155*, 172-187.



1667 Scorrano, L., De Matteis, M.A., Emr, S., Giordano, F., Hajnoczky, G., Kornmann, B., Lackner, L.L., Levine, T.P.,  
1668 Pellegrini, L., Reinisch, K., *et al.* (2019). Coming together to define membrane contact sites. *Nature communications*  
1669 *10*, 1287.  
1670 Shigetomi, E., Bushong, E.A., Hausteiner, M.D., Tong, X., Jackson-Weaver, O., Kracun, S., Xu, J., Sofroniew, M.V.,  
1671 Ellisman, M.H., and Khakh, B.S. (2013). Imaging calcium microdomains within entire astrocyte territories and endfeet  
1672 with GCaMPs expressed using adeno-associated viruses. *The Journal of general physiology* *141*, 633-647.  
1673 Shigetomi, E., Patel, S., and Khakh, B.S. (2016). Probing the Complexities of Astrocyte Calcium Signaling. *Trends in*  
1674 *cell biology* *26*, 300-312.  
1675 Sofroniew, M.V. (2015). Astrocyte barriers to neurotoxic inflammation. *Nat Rev Neurosci* *16*, 249-263.  
1676 Stephen, T.L., Higgs, N.F., Sheehan, D.F., Al Awabdh, S., Lopez-Domenech, G., Arancibia-Carcamo, I.L., and Kittler,  
1677 J.T. (2015). Miro1 Regulates Activity-Driven Positioning of Mitochondria within Astrocytic Processes Apposed to  
1678 Synapses to Regulate Intracellular Calcium Signaling. *J Neurosci* *35*, 15996-16011.  
1679 Sterky, F.H., Lee, S., Wibom, R., Olson, L., and Larsson, N.G. (2011). Impaired mitochondrial transport and Parkin-  
1680 independent degeneration of respiratory chain-deficient dopamine neurons in vivo. *Proc Natl Acad Sci U S A* *108*,  
1681 12937-12942.  
1682 Supplie, L.M., Dusing, T., Campbell, G., Diaz, F., Moraes, C.T., Gotz, M., Hamprecht, B., Boretius, S., Mahad, D., and  
1683 Nave, K.A. (2017). Respiration-Deficient Astrocytes Survive As Glycolytic Cells In Vivo. *J Neurosci* *37*, 4231-4242.  
1684 Sweeney, M.D., Ayyadurai, S., and Zlokovic, B.V. (2016). Pericytes of the neurovascular unit: key functions and  
1685 signaling pathways. *Nat Neurosci* *19*, 771-783.  
1686 Tran, C.H.T., Peringod, G., and Gordon, G.R. (2018). Astrocytes Integrate Behavioral State and Vascular Signals  
1687 during Functional Hyperemia. *Neuron* *100*, 1133-1148 e1133.  
1688 Villapol, S., Byrnes, K.R., and Symes, A.J. (2014). Temporal dynamics of cerebral blood flow, cortical damage,  
1689 apoptosis, astrocyte-vasculature interaction and astrogliosis in the pericontusional region after traumatic brain injury.  
1690 *Frontiers in neurology* *5*, 82.  
1691 Volterra, A., Liaudet, N., and Savtchouk, I. (2014). Astrocyte Ca(2)(+) signalling: an unexpected complexity. *Nat Rev*  
1692 *Neurosci* *15*, 327-335.  
1693 Voskuhl, R.R., Peterson, R.S., Song, B., Ao, Y., Morales, L.B., Tiwari-Woodruff, S., and Sofroniew, M.V. (2009).  
1694 Reactive astrocytes form scar-like perivascular barriers to leukocytes during adaptive immune inflammation of the  
1695 CNS. *J Neurosci* *29*, 11511-11522.  
1696 Wang, X., Lou, N., Xu, Q., Tian, G.F., Peng, W.G., Han, X., Kang, J., Takano, T., and Nedergaard, M. (2006).  
1697 Astrocytic Ca<sup>2+</sup> signaling evoked by sensory stimulation in vivo. *Nat Neurosci* *9*, 816-823.  
1698 Wickersham, I.R., Lyon, D.C., Barnard, R.J., Mori, T., Finke, S., Conzelmann, K.K., Young, J.A., and Callaway, E.M.  
1699 (2007). Monosynaptic restriction of transsynaptic tracing from single, genetically targeted neurons. *Neuron* *53*, 639-  
1700 647.  
1701 Wong, B.W., Marsch, E., Treps, L., Baes, M., and Carmeliet, P. (2017). Endothelial cell metabolism in health and  
1702 disease: impact of hypoxia. *EMBO J* *36*, 2187-2203.  
1703 Zamanian, J.L., Xu, L., Foo, L.C., Nouri, N., Zhou, L., Giffard, R.G., and Barres, B.A. (2012). Genomic analysis of  
1704 reactive astrogliosis. *J Neurosci* *32*, 6391-6410.  
1705 Zariwala, H.A., Borghuis, B.G., Hoogland, T.M., Madisen, L., Tian, L., De Zeeuw, C.I., Zeng, H., Looger, L.L.,  
1706 Svoboda, K., and Chen, T.W. (2012). A Cre-dependent GCaMP3 reporter mouse for neuronal imaging in vivo. *J*  
1707 *Neurosci* *32*, 3131-3141.  
1708 Zudaire, E., Gambardella, L., Kurcz, C., and Vermeren, S. (2011). A computational tool for quantitative analysis of  
1709 vascular networks. *PLoS one* *6*, e27385.

1711

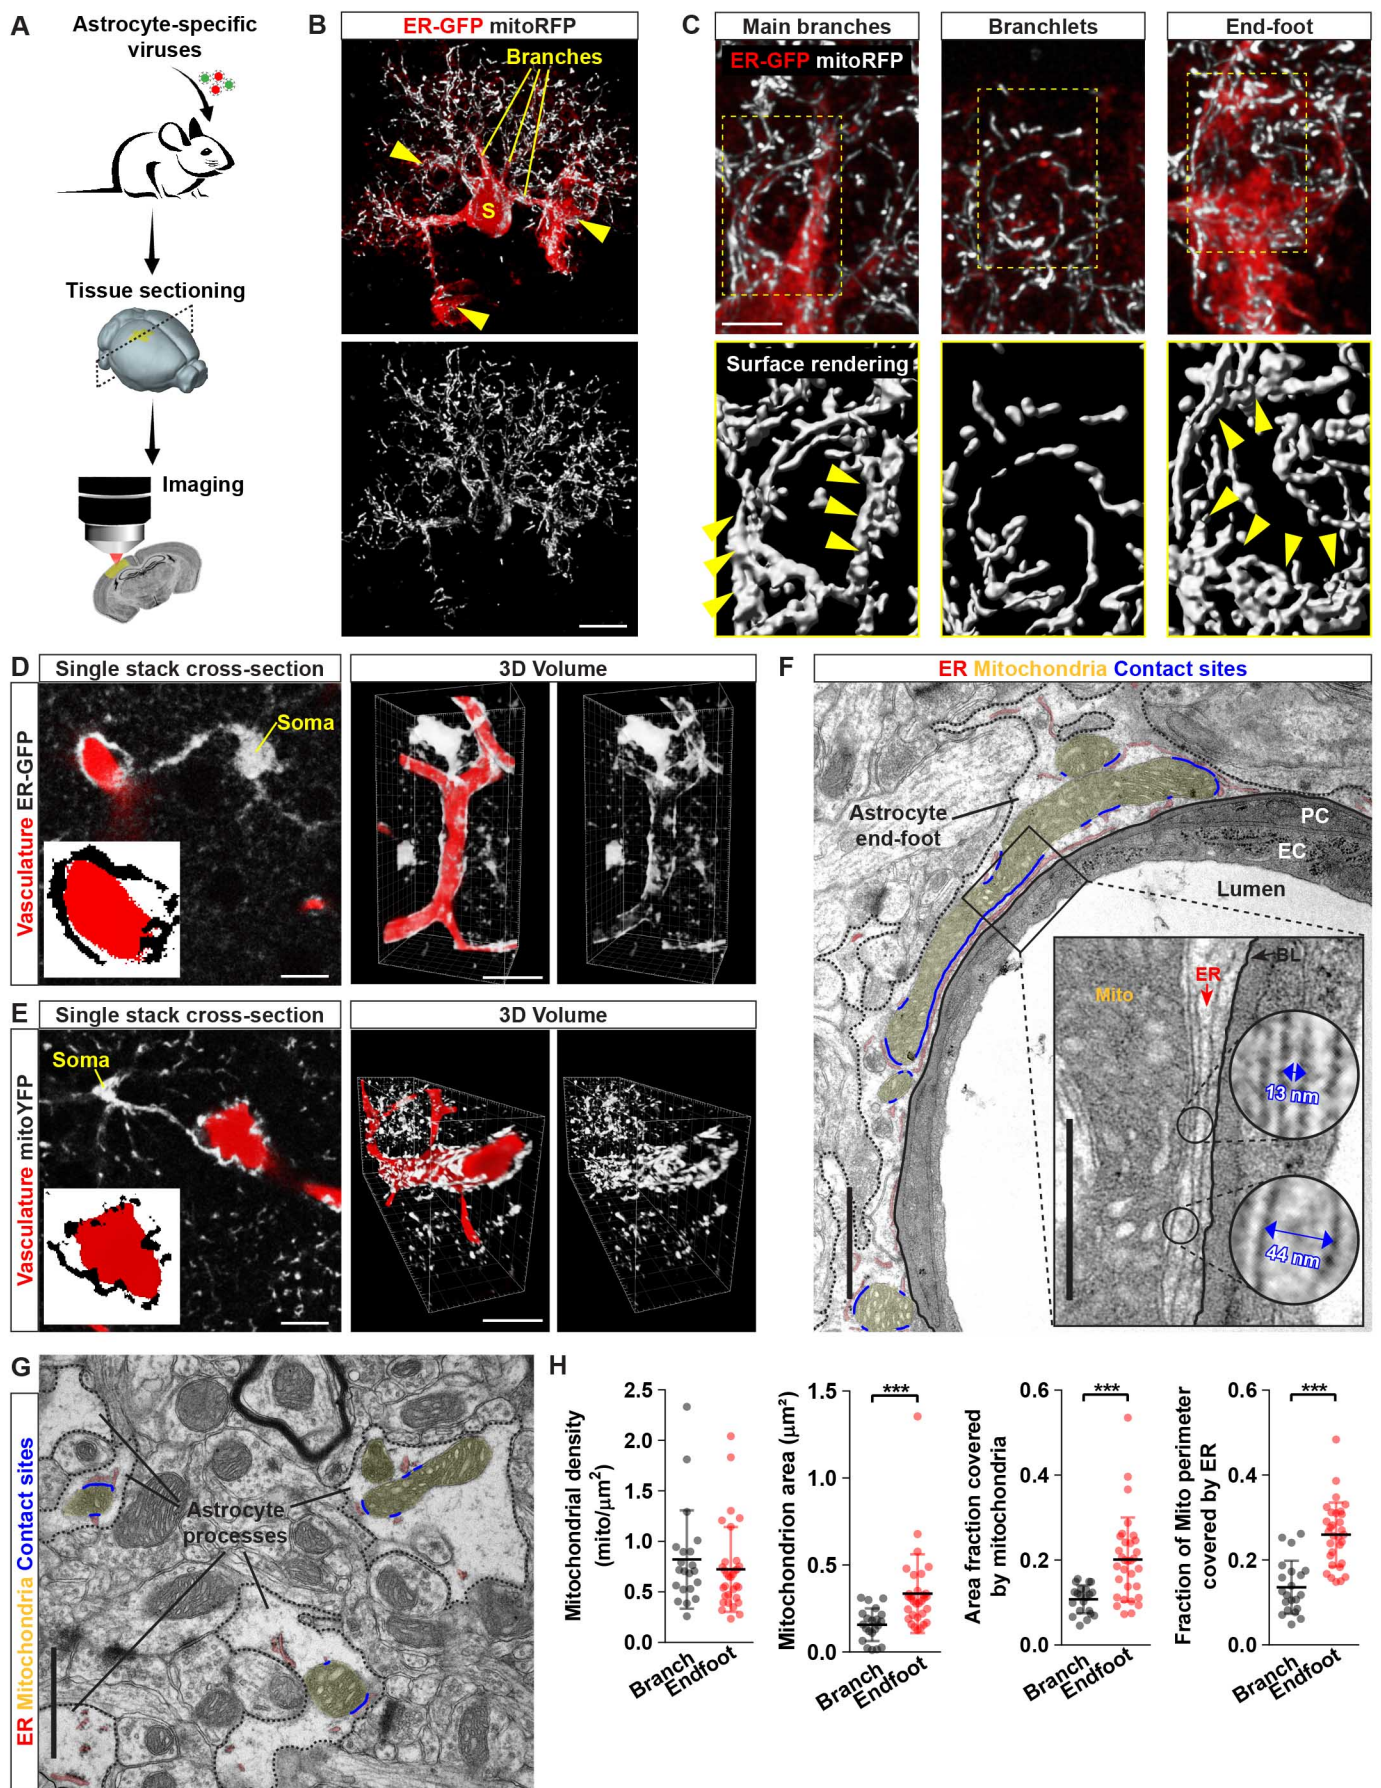

Figure 1

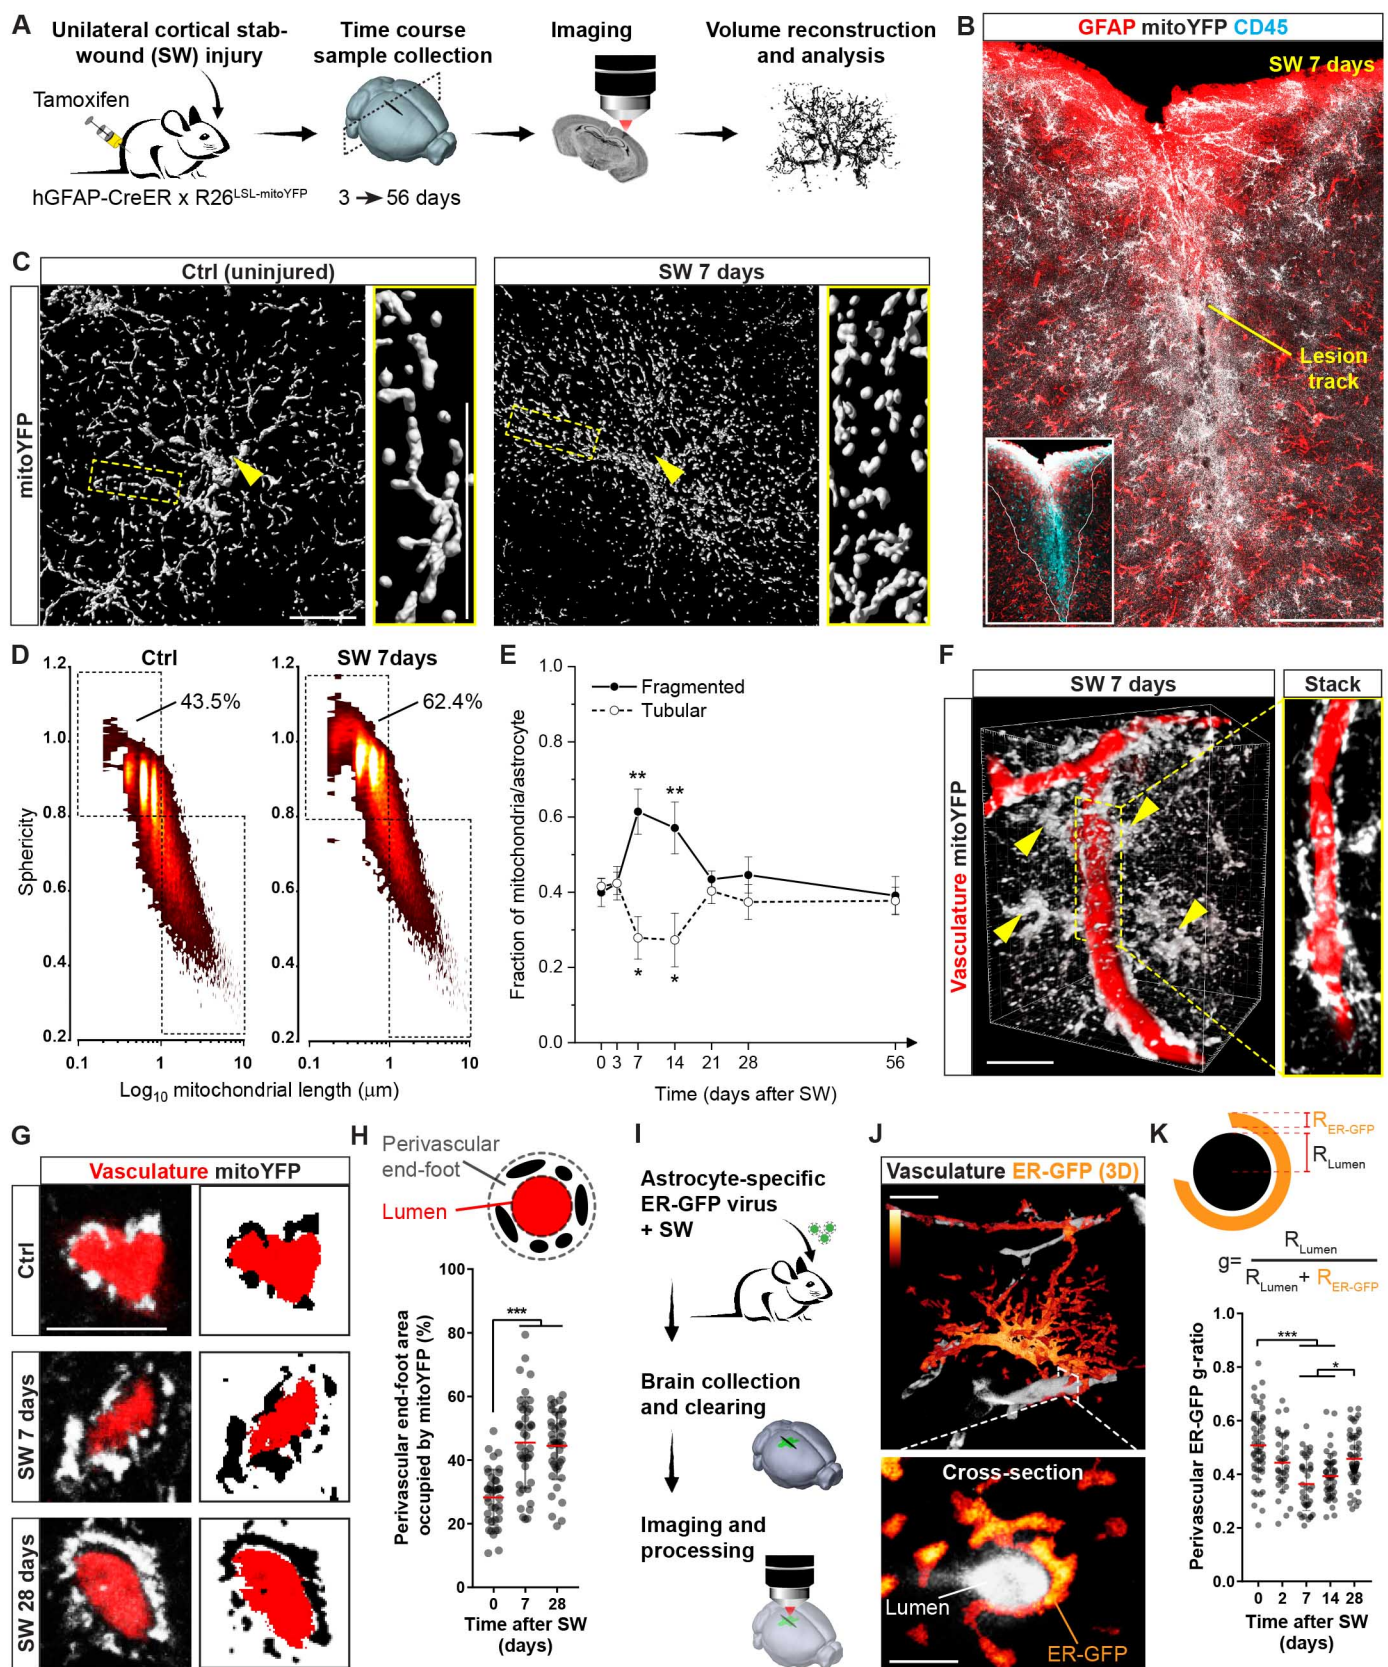

Figure 2

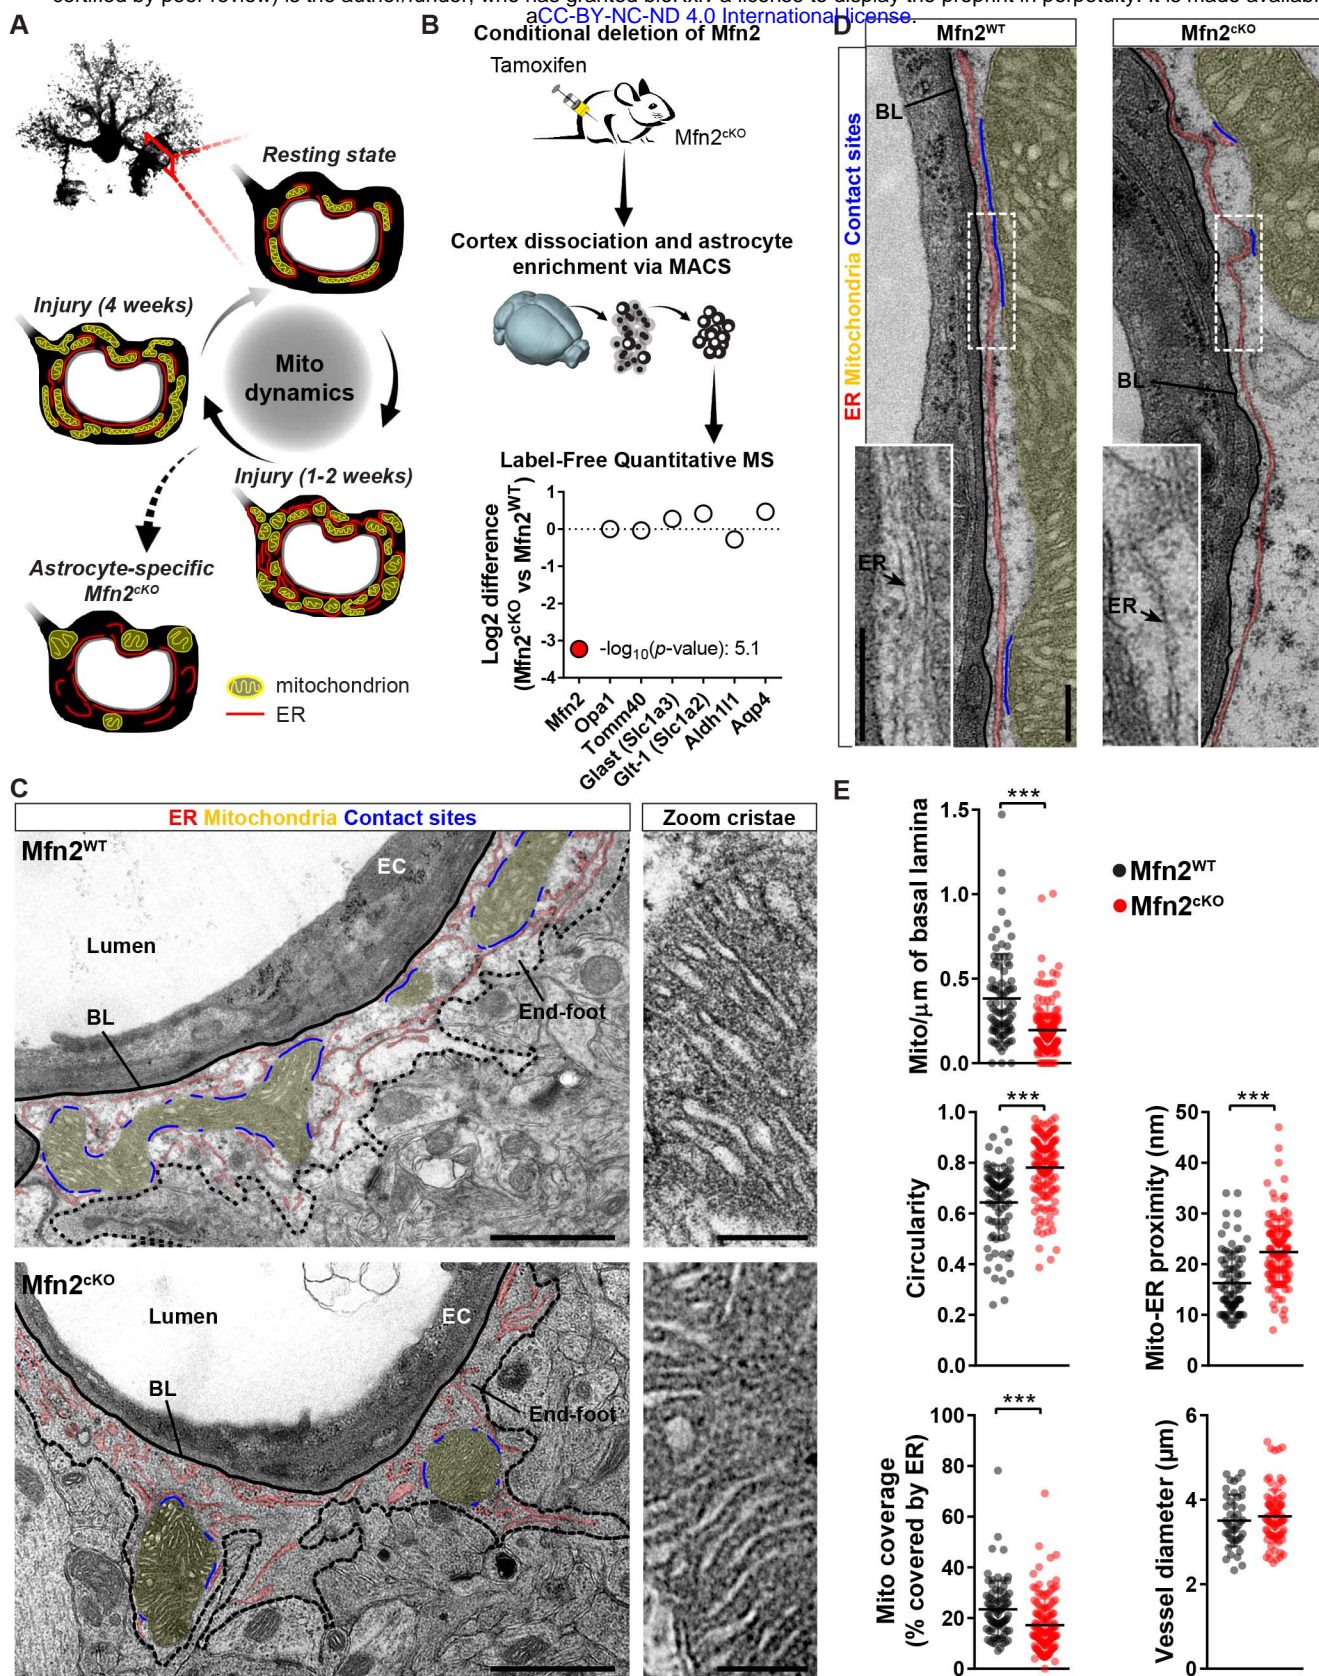

Figure 3

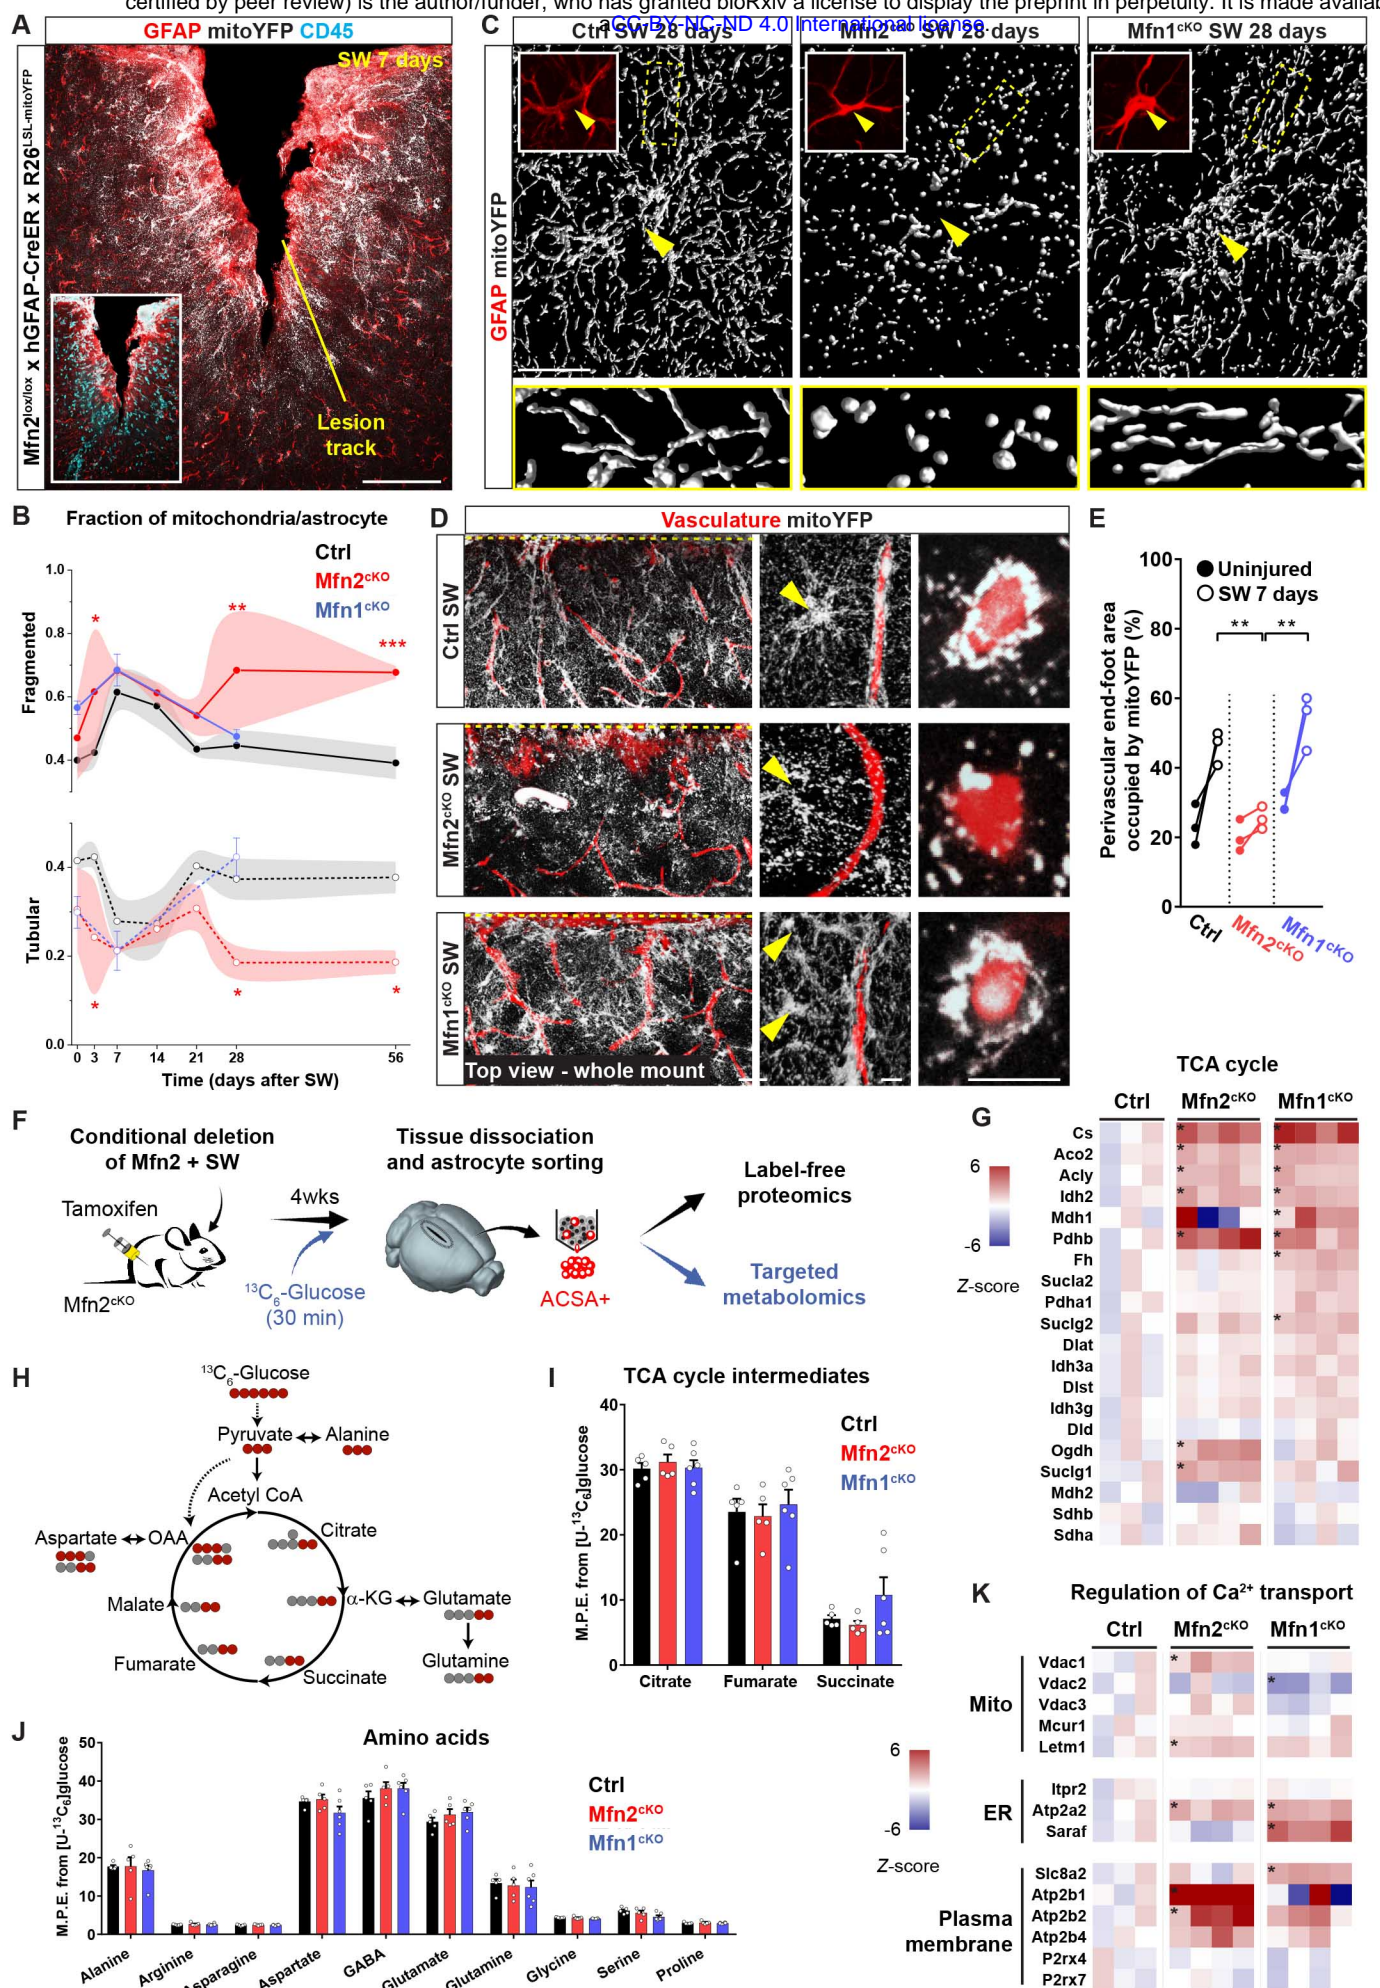

Figure 4

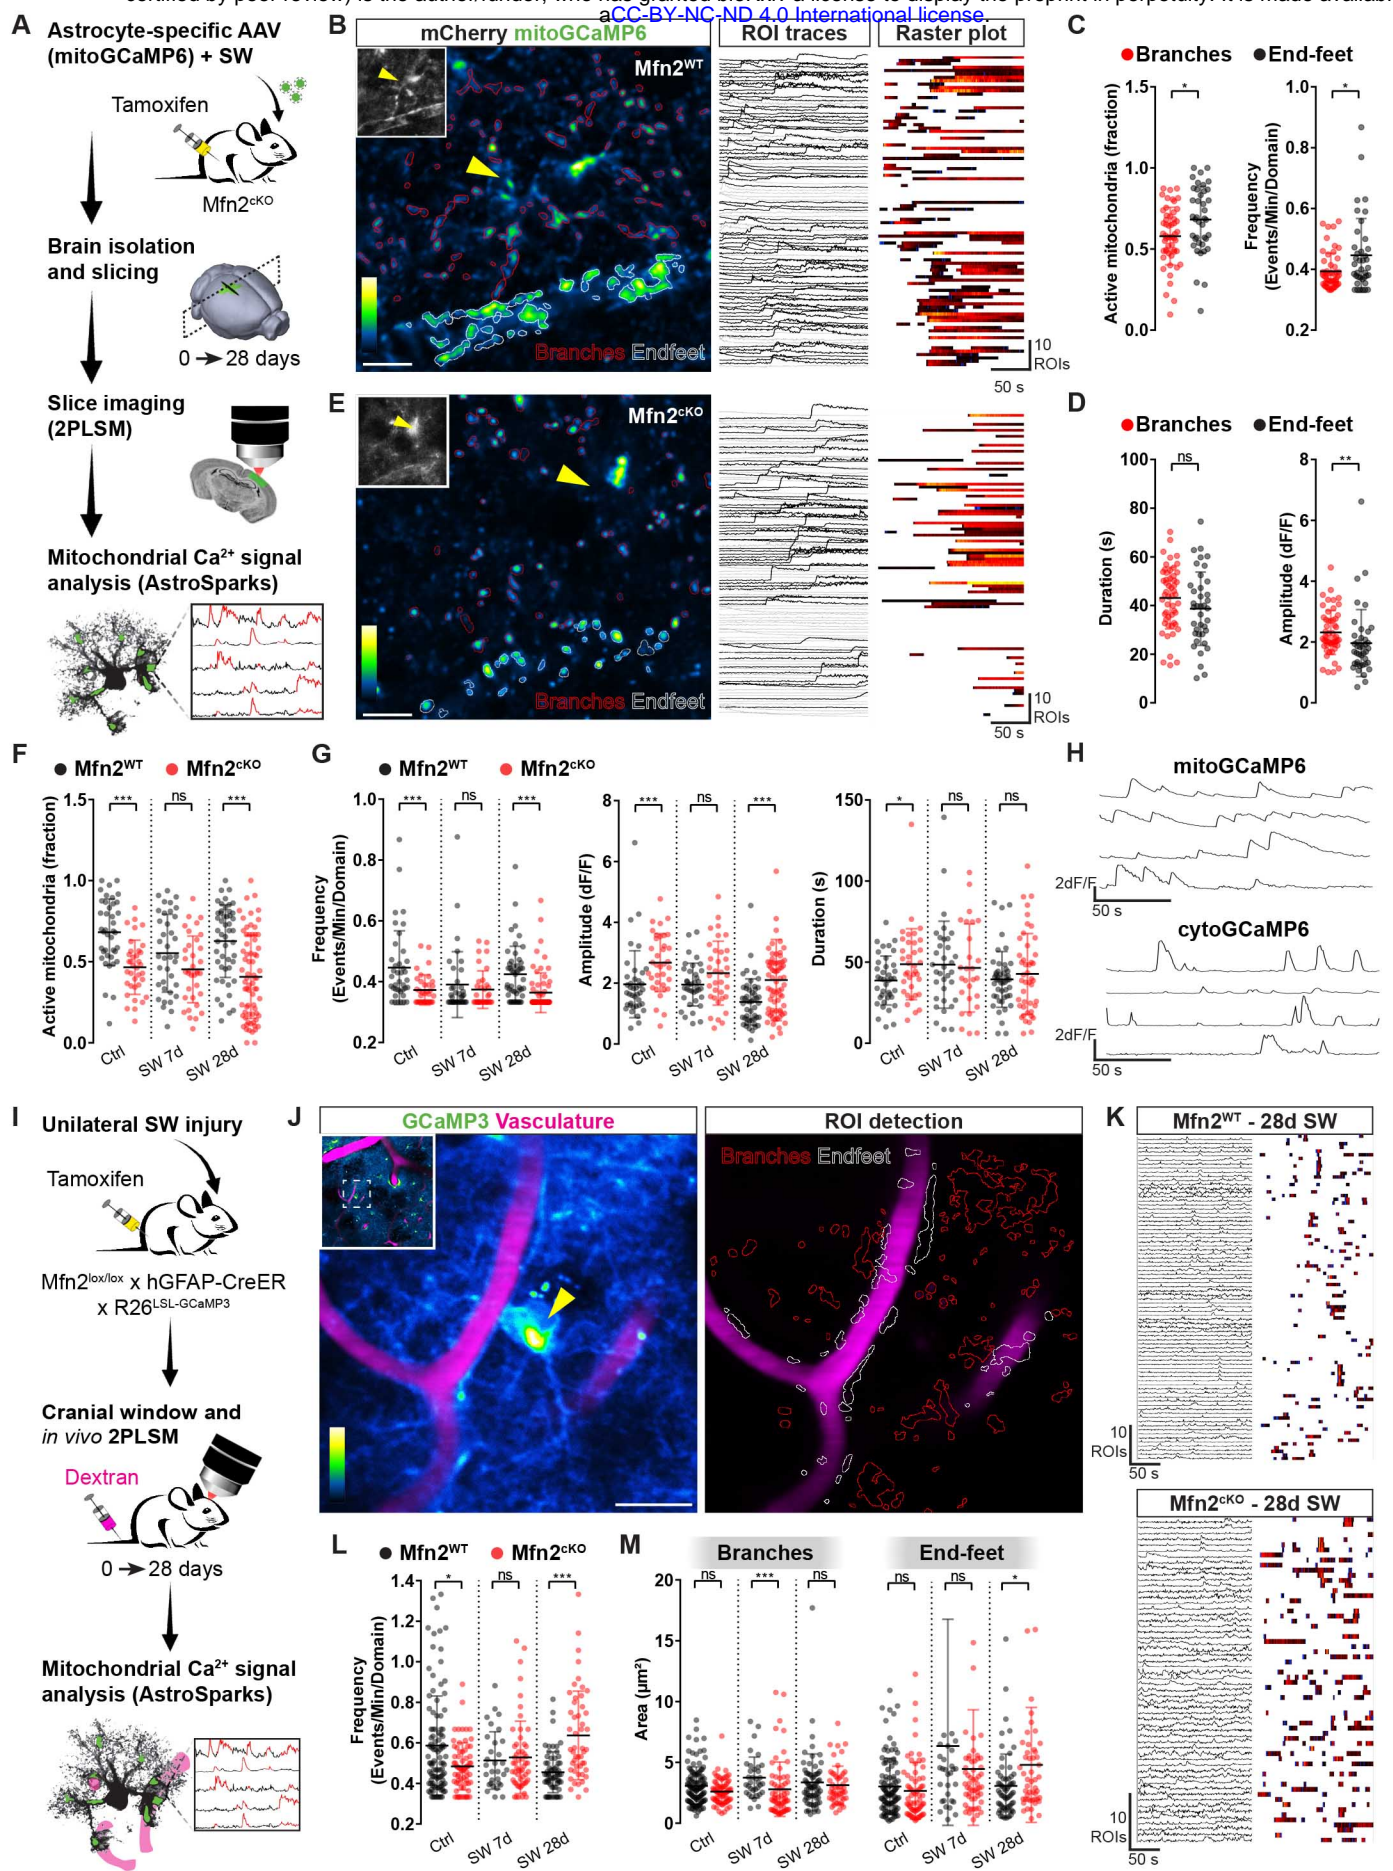

Figure 5

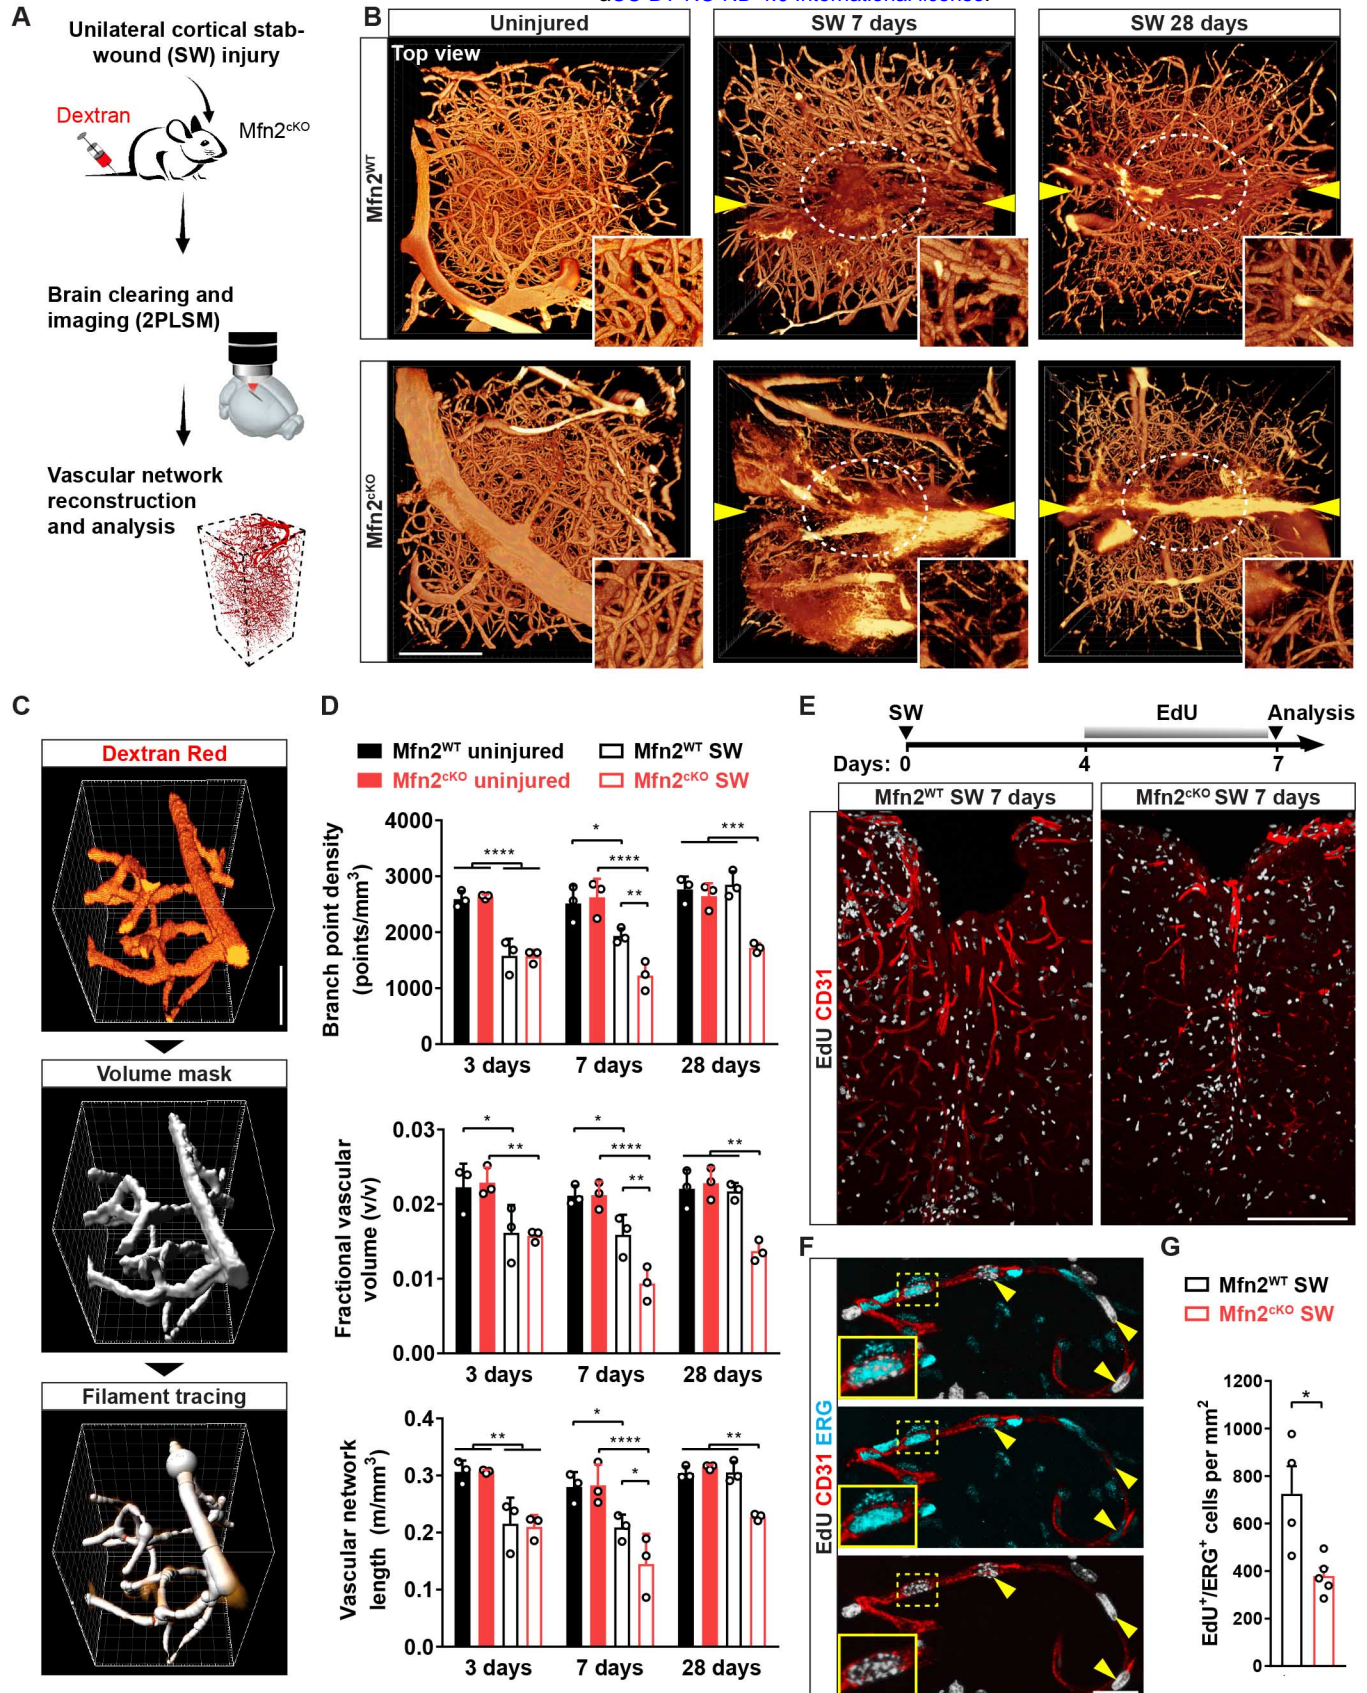

Figure 6

**A** AAV5 GfaABC<sub>1</sub>D OMM-ER linker  
*OMM(mAKAP1)-mRFP-ER(yUBC6)*

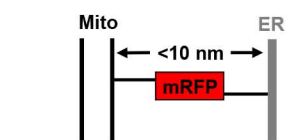

Tissue sectioning and imaging

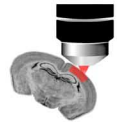

Brain isolation and slicing

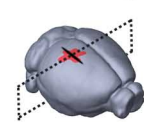

Astrocyte-specific AAV  
 (OMM-ER linker)

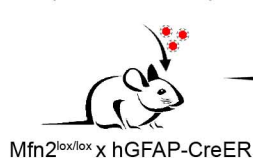

*Mfn2<sup>lox/lox</sup> x hGFAP-CreER*

Forced anchorage of mitochondria to ER

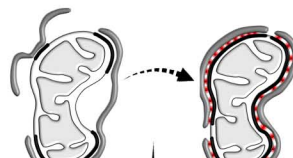

2 weeks

Conditional deletion of *Mfn2*

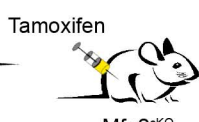

*Mfn2<sup>cKO</sup>*

SW injury

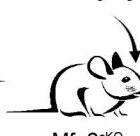

*Mfn2<sup>cKO</sup>*

**D**

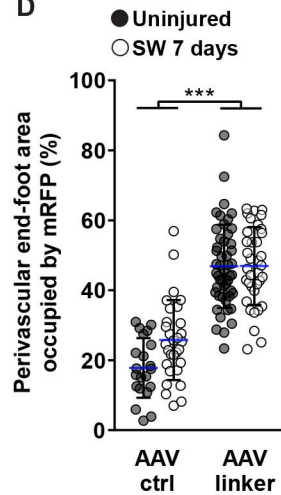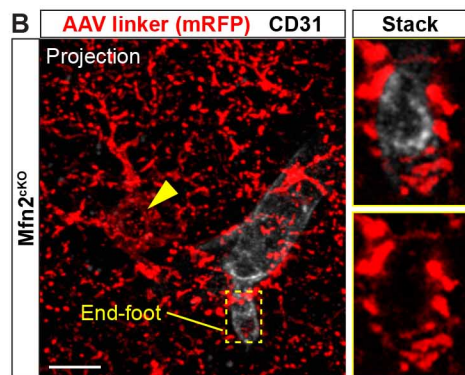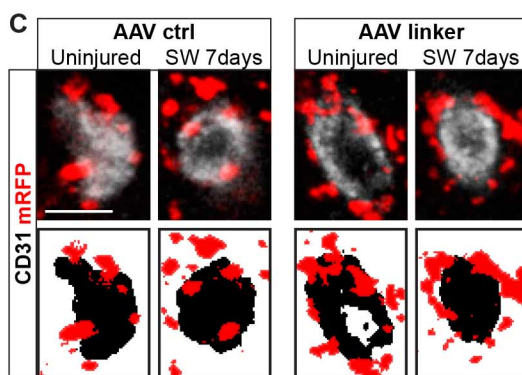

**E**

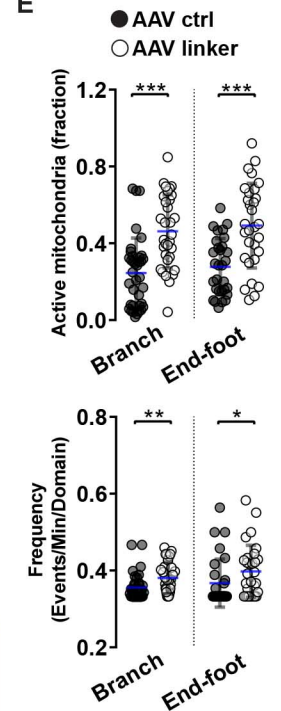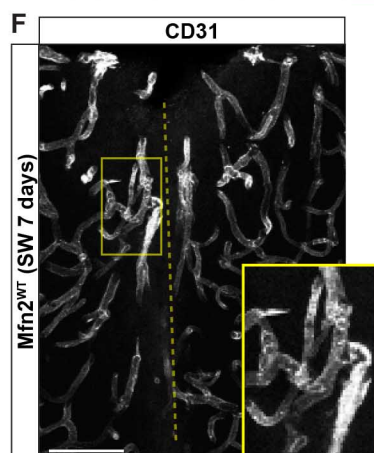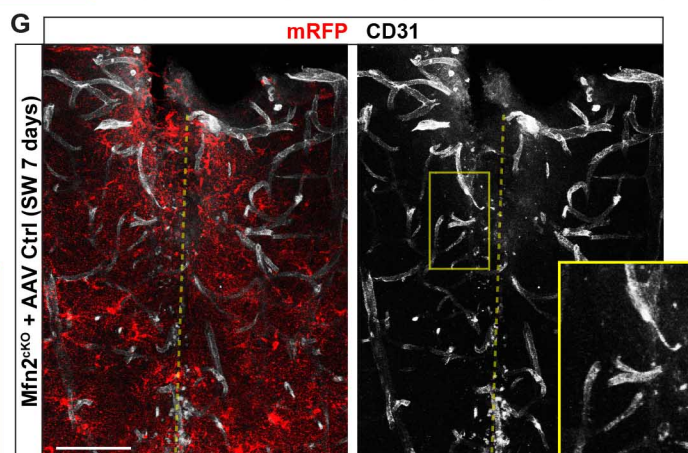

**H**

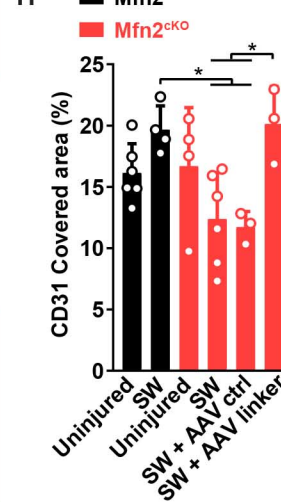

Figure 7
